# Supplementary material
Source: PubMed Central journal article supplement (PMC8392071)
Supplement: mmc1.pdf [file mmc1.pdf]

**Biophysical Journal, Volume 120**

**Supplemental information**

**Dynamics of the SARS-CoV-2 nucleoprotein N-terminal domain triggers  
RNA duplex destabilization**

**Ícaro P. Caruso, Karoline Sanches, Andrea T. Da Poian, Anderson S. Pinheiro, and Fabio  
C.L. Almeida**

# **Dynamics of the SARS-CoV-2 nucleoprotein N-terminal domain triggers RNA duplex destabilization**

Ícaro P. Caruso<sup>1,2,\*</sup>, Karoline Sanches<sup>1,2</sup>, Andrea T. Da Poian<sup>2</sup>, Anderson S. Pinheiro<sup>3</sup>, Fabio C. L. Almeida<sup>2,\*</sup>

<sup>1</sup>Multiusers Center for Biomolecular Innovation (CMIB) and Department of Physics, Institute of Biosciences, Letters and Exact Sciences (IBILCE), São Paulo State University (UNESP), 15054-000, São José do Rio Preto, SP, Brazil;

<sup>2</sup>Institute of Medical Biochemistry Leopoldo de Meis (IBqM) and National Center for Structural Biology and Bioimaging (CENABIO), Federal University of Rio de Janeiro (UFRJ), 21941-590, Rio de Janeiro, RJ, Brazil;

<sup>3</sup>Department of Biochemistry, Institute of Chemistry, Federal University of Rio de Janeiro (UFRJ), 21941-590, Rio de Janeiro, RJ, Brazil.

\*Corresponding authors e-mail address: [falmeida@bioqmed.ufrj.br](mailto:falmeida@bioqmed.ufrj.br)

[icaro.caruso@unesp.br](mailto:icaro.caruso@unesp.br)

Tel.: +55-21-31042326

Tel.: +55-17-32212828

## SUPPLEMENTARY MATERIAL

### Modeling the dsRNA melting activity

We used the software Kinetiscope (<http://hinsberg.net/kinetiscope/>), which is based on a stochastic algorithm developed by Bunker (1) and Gillespie (2). We used the elementary rate constants for individual chemical steps to produce an absolute time base (Figure 6A). The starting condition mimics exactly the experimental condition, varying the concentration of N-NTD over 50 nM dsRNA (dsTRS). The predictions were validated by direct comparison to the experimental data (3).

To simulate the melting curve, we had to constrain the kinetic space, which is large because each model is composed by 6 reactions and 12 individual rate constants, assuming the following boundaries: (B1) the kinetic model must be complete, complying all possible reactions for a given mechanism; (B2) the presence of N-NTD must lead to catalysis, with the melting of dsRNA being faster than the annealing reaction; (B3) the equilibrium of the annealing is shifted toward the dsRNA; and (B4) the equilibrium for the melting activity must be reached in less than 133 seconds, as described by Grosseohme et al. (3).

The criterion for choosing the rate constants for the annealing reaction (R1, Figure 6) was that it must be significantly slower than the melting activity (catalysis). As to our knowledge there is no experimental kinetic rate constant available for the annealing of dsTRS, we fixed a  $k_{off} = 8 \times 10^{-4} \cdot s^{-1}$  for the simulations, which is the experimental value of the dissociation rate constant observed for the almost inactive Y127A N-NTD+SR mutant (3). This mutant has a melting activity of hours, 30 fold slower than the wild-type (3), while our simulation showed melting activities of tens of seconds (Figure 6B). To yield an equilibrium shifted toward the dsRNA, we used  $k_{on} = 4 \times 10^{-1} M^{-1} \cdot s^{-1}$ , which is true below

the melting temperature of the dsRNA. Any values of  $k_{off} < 1 \text{ s}^{-1}$ , with an association constant  $K_a$ , gives the same molar fraction of dsRNA.

We constrained the binding reactions R2 and R3 of N-NTD to the sense (TRS) and antisense (cTRS) single-stranded RNA (ssRNA) (Figure 6A) based on the published experimental values for these association constants (3, 4). Since these values were very similar, to simplify the simulation, we used the same  $K_a$  for both reactions ( $K_a = 4 \times 10^7 \text{ M}^{-1}$ ). Note that  $k_{on} < 10^6 \text{ M}^{-1} \cdot \text{s}^{-1}$  makes the reaction too slow to reach equilibrium, violating the boundary B4 (Figures S14A and S16B).

For dsRNA (dsTRS) binding, there was no experimental data to constrain the simulation. However, simulations unambiguously showed that  $K_a$  for reaction R4 must be of the same order of that for ssRNAs, leading to the allowed ranges depicted in Figure 6A. We also determined  $k_{on}$  based on the simulations, taking boundaries B2 and B4 into consideration, which were also considered for reactions from R1 to R3 (Figure S16B, S17A and S18B). All the constraints applied to reactions from R1 to R4 are valid for both kinetic models (models 1 and 2). Conversely, reactions R5 and R6 are specific for each kinetic model, being essential to comply with boundary B1.

For model 1, there is no experimental data available to constrain reactions R5 and R6, but the simulations showed that they are tightly related to reactions R2 and R3, being both  $K_a$  and  $k_{off}$  of the same order of magnitude for reactions R2 and R3 (Figure S16C). Note that there is an intricate relationship between the formation of ssRNA-bound states (C2 and C3) and the decrease of free or bound dsRNA (dsTRS and C4). To illustrate this relationship, Figure 6B shows the kinetics at three concentrations of N-NTD. The simulated melting curves for model 1 resembled the near exponential decay observed experimentally (Figure 6C, left). Interestingly, when  $k_{off}$  of reactions R5 and R6 were bigger than  $k_{off}$  for



reactions R2 and R3, we observed a plateau in the exponential decay of the dsRNA melting curve (Figure 6C). Remarkably, melting curves that either decayed to zero or reached a plateau was observed experimentally, as mentioned before (3). It is worth mentioning that the kinetic model 1 is fully compatible with the experimental data by Grosseohme et al. (2009) (3), as well as with the triggering event suggested by the MD simulations, in which one N-NTD can initiate dsRNA melting, destabilizing the WC base-pairing.

We also evaluated the kinetic model 2, in which a sandwich of 2 N-NTD and 1 dsRNA is necessary for the melting reaction. This stoichiometry for N-NTD melting activity should be considered, since the full-length N protein is a biologically functional dimer and the recognition of the TRS duplex by the two N-NTD subunits for the melting activity is possible. In this model, a sandwich of two N-NTDs and one dsRNA is formed, and the final products are each N-NTD bound to TRS and cTRS ssRNA.

To build a kinetic model that would exclusively produce ssRNA from the sandwiched dsRNA, we had to replace reactions R5 and R6 of kinetic model 1. In this new model, reaction R5 forms the sandwiched dsRNA (C5, Figure 6A) and reaction R6 is the dissociation of C5 into the ssRNA-bound N-NTDs (C2 and C3, Figure 6A). To simulate N-NTD melting activity considering model 2, we used the same boundaries described earlier (B1, B2, B3 and B4), with reactions from R1 to R4 having almost the same constraints described for the model 1.

Reaction R5 and R6 of the model 2 has no parallel to any other reaction. We scanned all the kinetic space that led to the catalysis of melting activity and observed two contrasting situations. The first is when reaction R6 equilibrium is between  $10^{-6}$  and  $10^7 \text{ M}^{-1}$ , always having the dissociated forms C2 and C3 available and making the melting curve very stiff (model 2a). The second is the opposite situation, where equilibrium is skewed

toward the sandwich state (C5) with  $K_a > 10^7 \text{ M}^{-1}$  (model 2b). Figure 6C illustrates the melting curves obtained for the two situations.

Model 2a is characterized for the high efficiency in the dissociation of the dsRNA,  $k_{on}$  and  $k_{off}$  can assume any value ( $n$  and  $m$ , Figure 6A) as long as  $K_a$  is between  $10^{-6}$  to  $10^7 \text{ M}^{-1}$ . Particularly for model 2a, the kinetic of dsRNA melting is also independent of  $k_{on}$  for reactions R2 and R3, at fixed concentrations of N-NTD. For R5, the equilibrium should be shifted toward C5, to keep up with boundaries B2 and B4 ( $K_a > 1$ , Figure S17B). All simulated conditions led to the curve in red (Figure 6C), in which, the minimal amount of N-NTD (10 nM) led to complete dissociation of the dsRNA (molar fraction of zero). Figure S17 illustrates all the simulated boundaries. Note that for the model 2a there is never an accumulation of C5 (Figure S17C).

Model 2b corresponds to when the equilibrium of reaction R6 is shifted toward C5 ( $K_a > 10^7 \text{ M}^{-1}$ ). For R5, we determined that  $k_{on}$  has to be  $> 10^7 \text{ s}^{-1}$  to keep up with boundaries B2 and B4. For the melting activity to take place, the equilibrium of reaction R5 was skewed toward C5 ( $K_a > 10^7 \text{ M}^{-1}$ , Figure S18C). Figure S18 illustrates the reaction boundaries. In this situation, we were able to observe a melting curve (Figure 6C, blue) with a near exponential decay at a low concentration of N-NTD and a near exponential rise at higher concentrations of N-NTD. This behavior is explained by the accumulation of C5 and N-NTD concentration-dependent mutual compensation of C5 and dsRNA. Note how  $K_a$  modulates the accumulation of C5, transitioning between models 2a and 2b (Figure S18D). The increase in the concentration of N-NTD led to a decrease in dsRNA forming C2, C3 and free ssRNA. Further increase in N-NTD led to a decrease in dsRNA and a compensating increase in C5. None of the situations simulated for model 2 are parallel to the experimental observation.

|              |                        |
|--------------|------------------------|
| <b>TRS-L</b> | <b>UUCUC-UAAACGAAC</b> |
| TRS-B S      | ACAAC-UAAACGAAC        |
| TRS-B ORF3a  | UACACAUAAACGAAC        |
| TRS-B E      | UUGUA-AGCACAAGC        |
| TRS-B M      | UGGUC-UAAACGAAC        |
| TRS-B ORF6   | UACAG-UAAGUGACA        |
| TRS-B ORF7a  | UUGAU-UAAACGAAC        |
| TRS-B ORF7b  | CACUC-AAAAGAAAG        |
| TRS-B ORF8   | ACGCC-UAAACGAAC        |
| TRS-B N      | UCAUC-UAAACGAAC        |
| TRS-B ORF9b  | CAAAC-UAAAAUGUC        |
| TRS-B ORF14  | UACAC-CAAAGAUC         |
| TRS-B ORF10  | AGGCC-UAAACUCAU        |

**Figure S1.** Pairwise alignment of the TRS-B sequences of each SARS-CoV-2 ORF (NCBI reference: NC\_045512.3) with that of TRS-L performed by ClustalW2 (5). The bold sequence denotes the sequence used in this work.

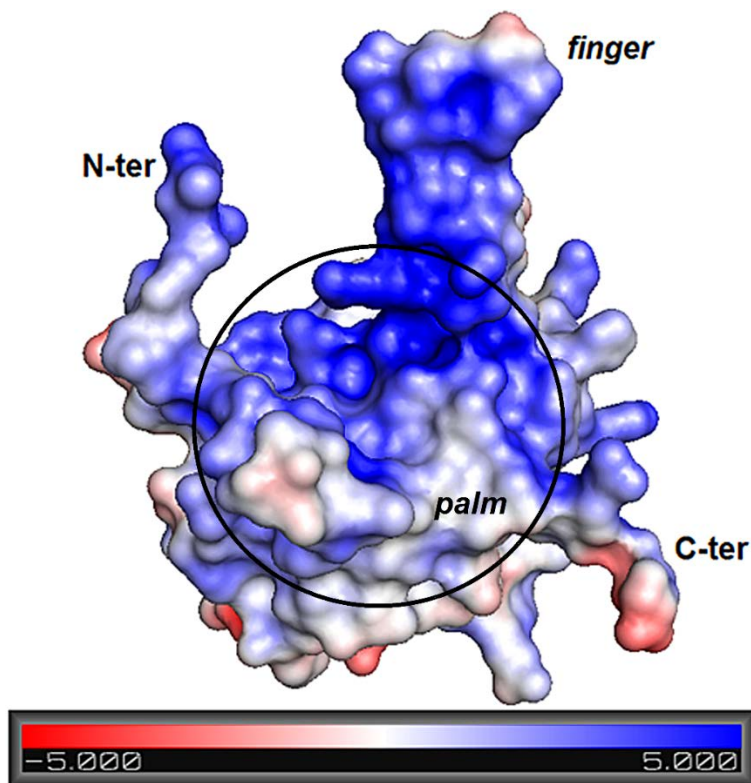

**Figure S2.** Electrostatic potential surface of SARS-CoV-2 N-NTD calculated from APBS software (6) using charge values and protonation states determined by PDB2PQR server (7) along with PROPKA program (pH 7.0, 50 mM NaCl, 25 °C) (8). The bar denotes the electrostatic potential range from  $-5$  (red) to  $+5$   $\text{kTe}^{-1}$  (blue). The electrostatic potential surface of N-NTD was displayed using PyMOL (9).

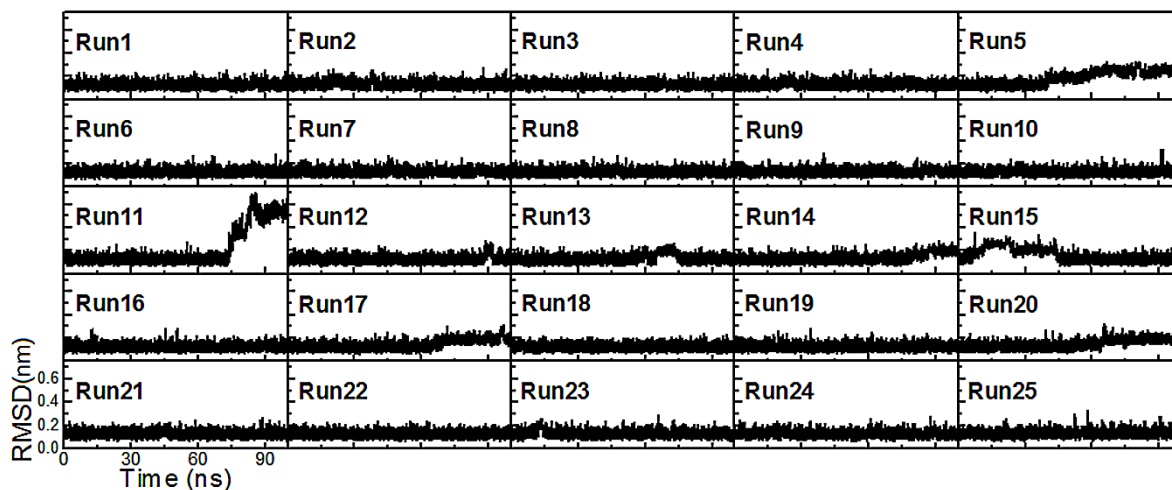

**Figure S3.** RMSD values of the backbone atoms of free dsTRS for the 25 replicas of 100 ns MD simulations.

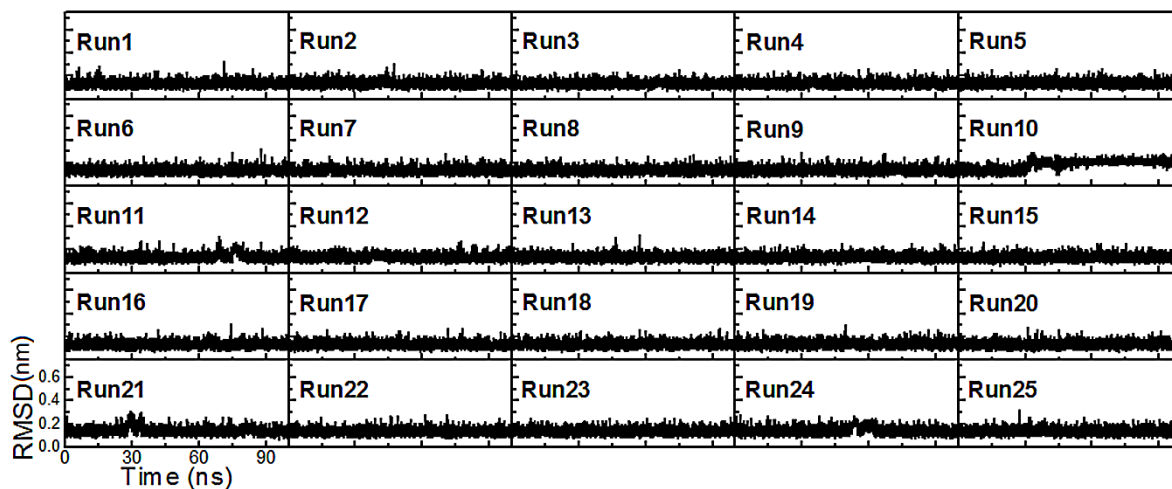

**Figure S4.** RMSD values of the backbone atoms of free dsNS for the 25 replicas of 100 ns MD simulations.

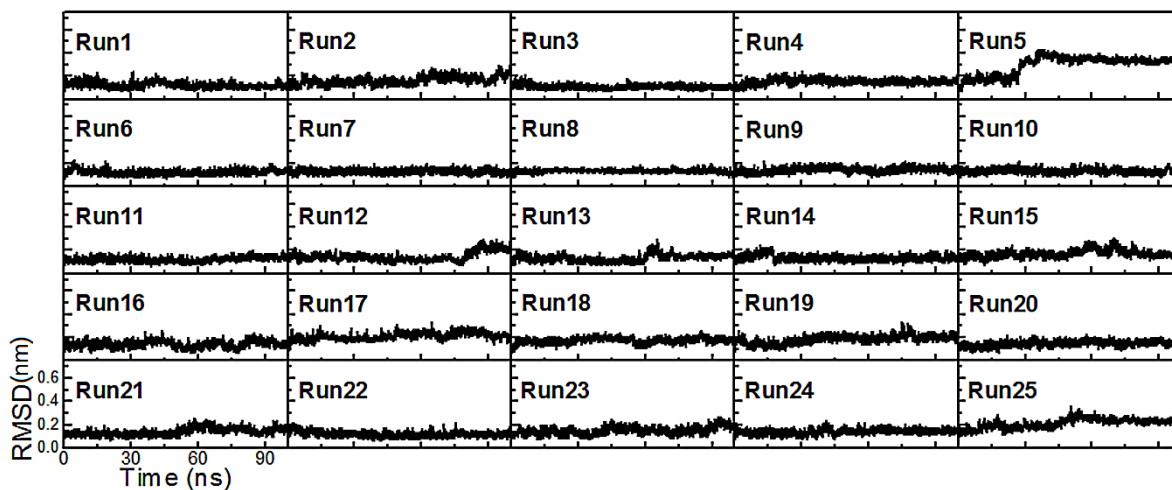

**Figure S5.** RMSD values of the backbone atoms of N-NTD-bound dsTRS for the 25 replicas of 100 ns MD simulations.

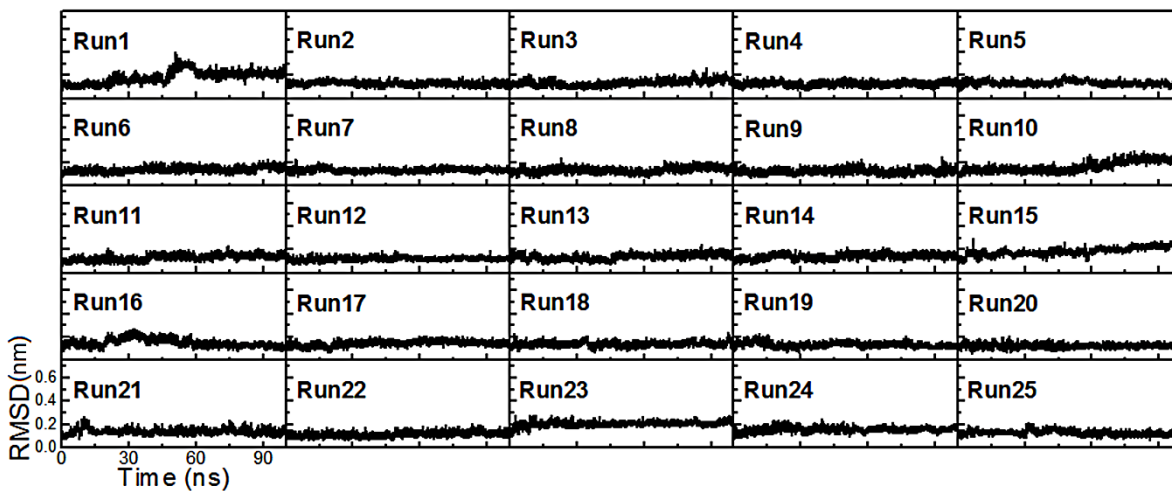

**Figure S6.** RMSD values of the backbone atoms of N-NTD-bound dsNS for the 25 replicas of 100 ns MD simulations.

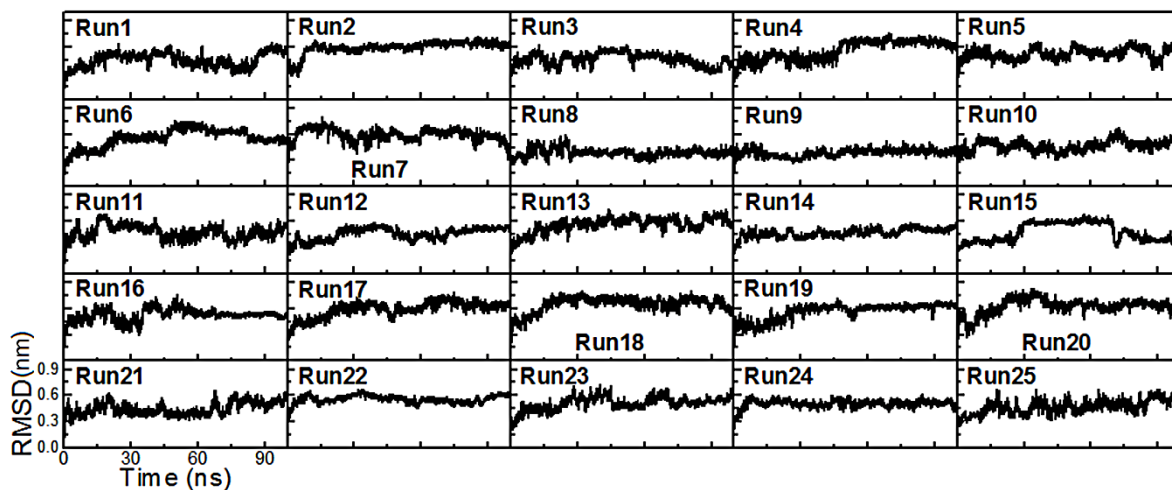

**Figure S7.** RMSD values of the backbone atoms of free N-NTD for the 25 replicas of 100 ns MD simulations.

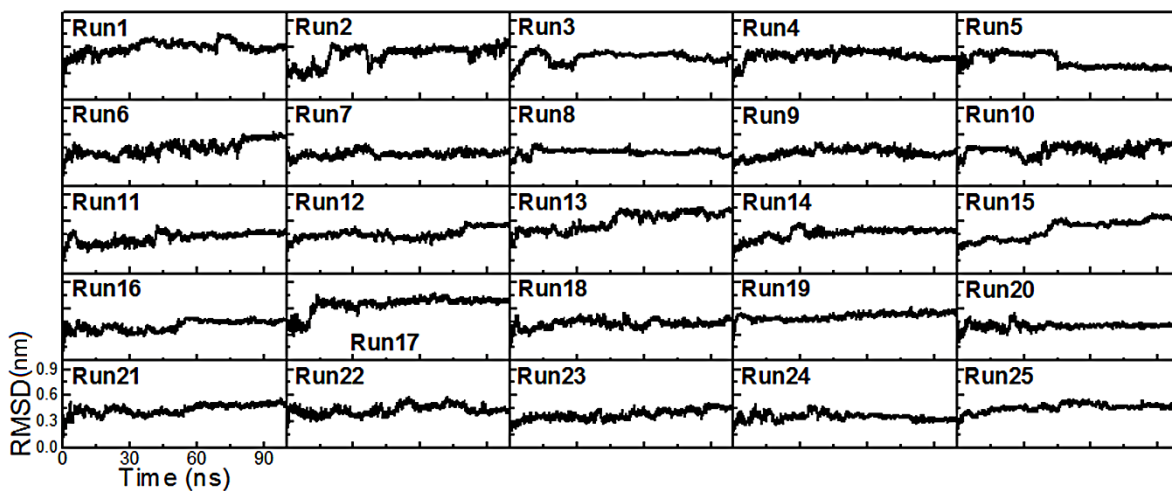

**Figure S8.** RMSD values of the backbone atoms of dsTRS-bound N-NTD for the 25 replicas of 100 ns MD simulations.

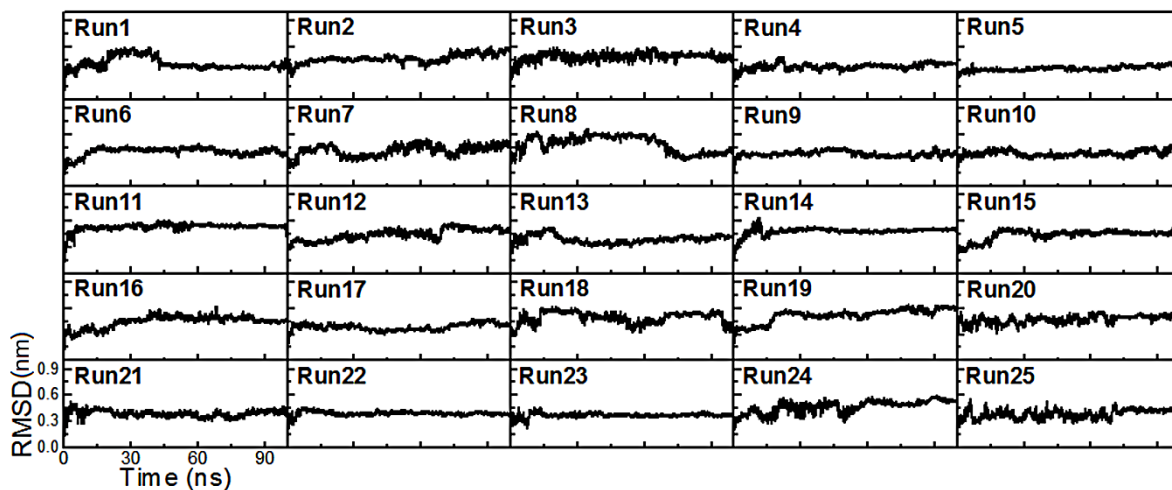

**Figure S9.** RMSD values of the backbone atoms of dsNS-bound N-NTD for the 25 replicas of 100 ns MD simulations.

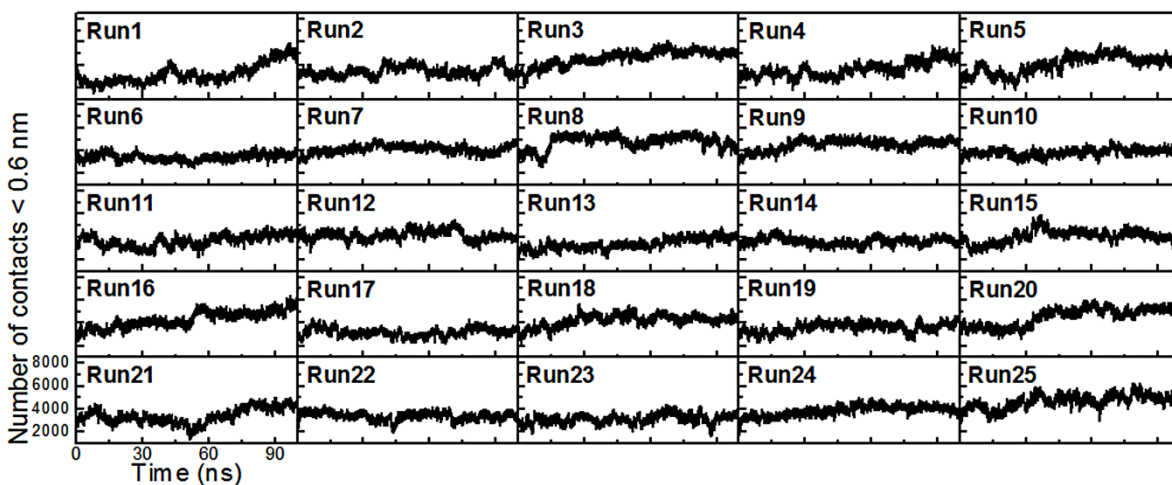

**Figure S10.** Number of contacts  $< 0.6$  nm between the N-NTD and dsTRS atoms for the 25 replicas of 100 ns MD simulations.

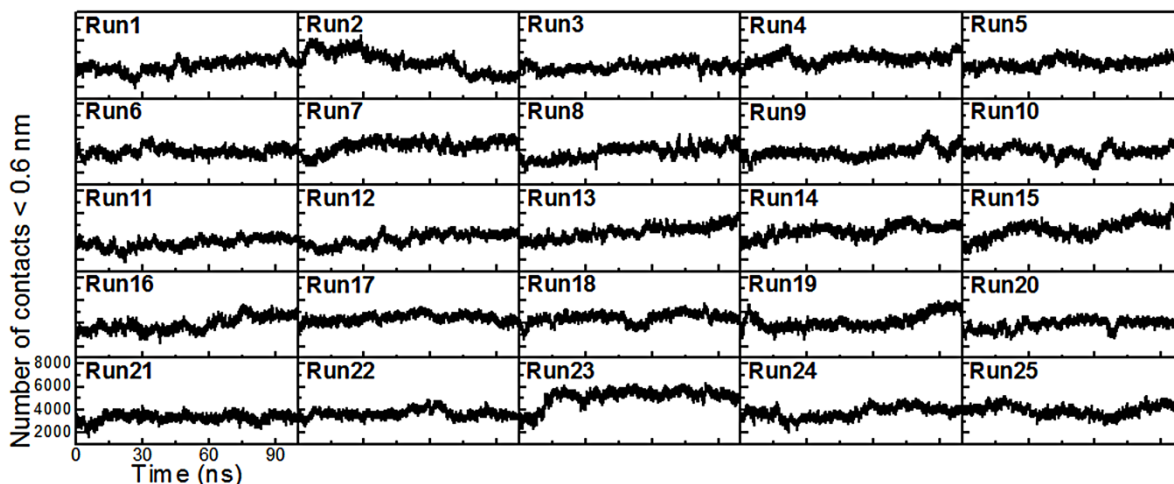

**Figure S11.** Number of contacts  $< 0.6$  nm between the N-NTD and dsNS atoms for the 25 replicas of 100 ns MD simulations.

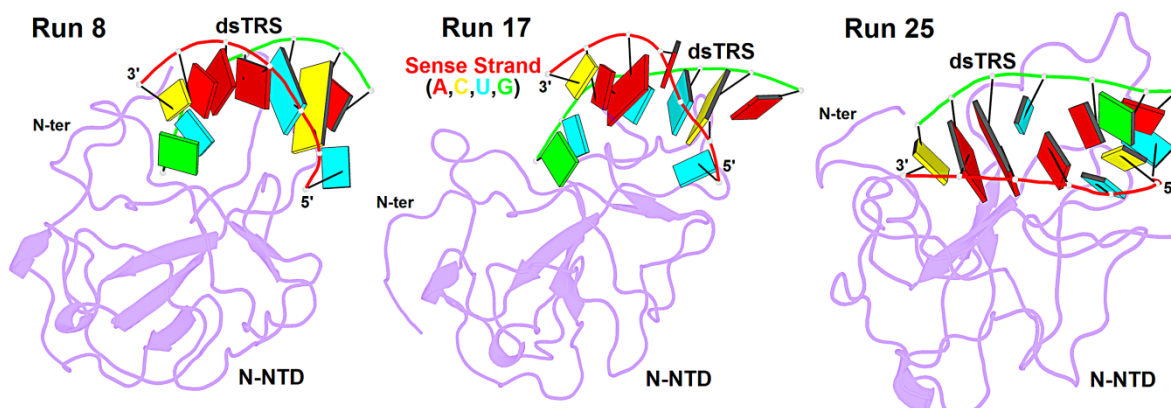

**Figure S12.** Structural model of the N-NTD:dsTRS complex representative of the MD simulation for runs 8, 17, and 25. The protein is shown as purple cartoon and dsTRS is denoted as ribbon model with nitrogenous bases and base-pairing as colored squares and rectangles, respectively. The color of the squares corresponds to the type of nitrogenous base, being A: red, C: yellow, U: cyan, and G: green. The color of the rectangles refers to the color of the nitrogenous base of the sense RNA strand.



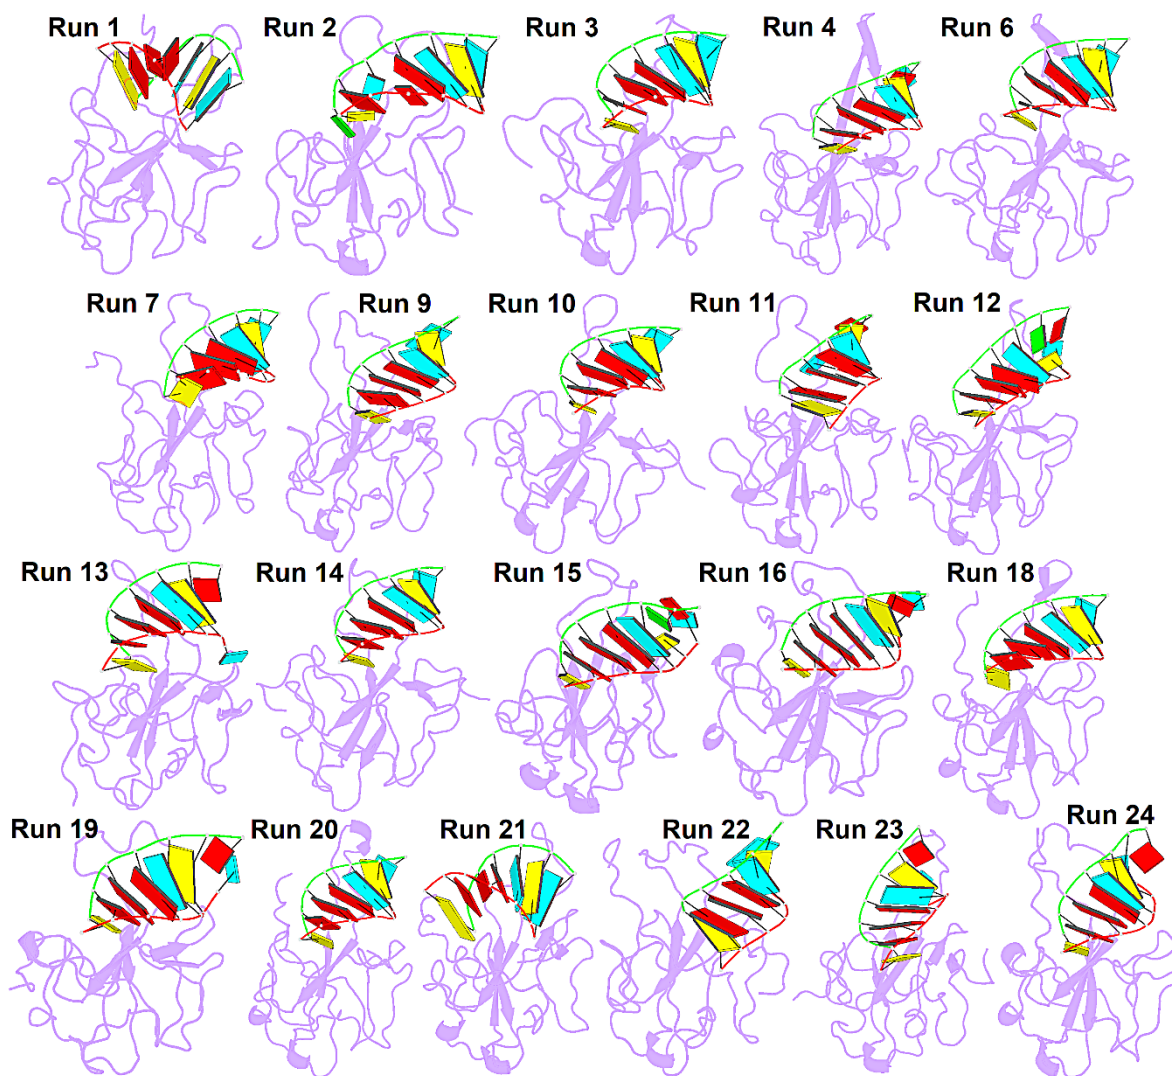

**Figure S13.** Structural model of the N-NTD:dsTRS complex of the MD simulations (last frames) for the runs that had no significant break of protein-nitrogenous base hydrogen bonds. The protein is shown as purple cartoon and dsTRS is denoted as ribbon model with nitrogenous bases and base-pairing as colored squares and rectangles, respectively. The color of the squares corresponds to the type of nitrogenous base, being A: red, C: yellow, U: cyan, and G: green. The color of the rectangles refers to the color of the nitrogenous base of the sense RNA strand. The protein structure representation is equally oriented in all runs, placing the N- and C-termini to the left and right, respectively, and the finger at the top.

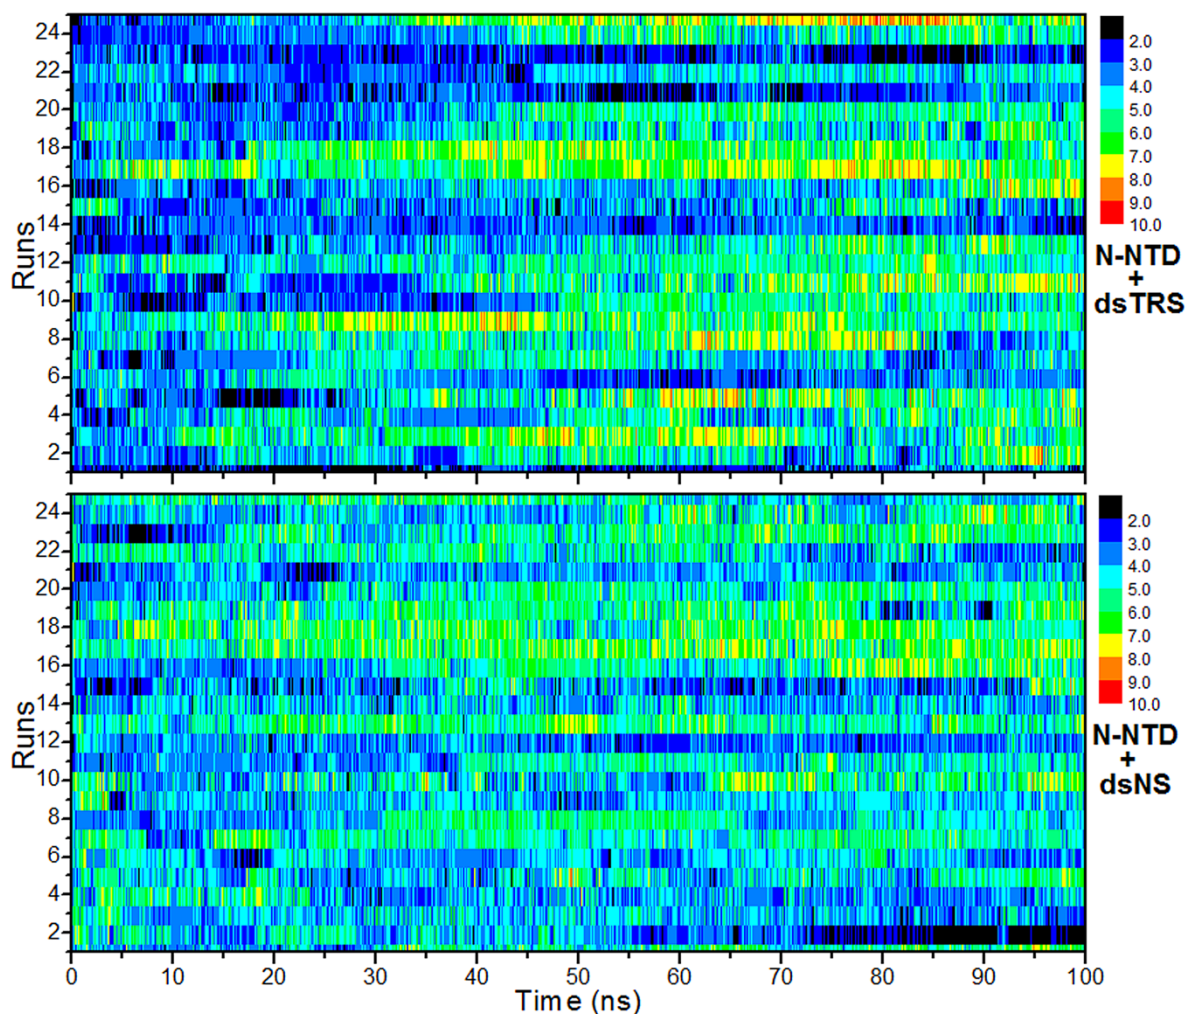

**Figure S14.** Number of intermolecular hydrogen bonds formed between the nitrogenous bases of the dsRNAs (dsTRS in top and dsNS in bottom) and N-NTD over the 100 ns simulations for the 25 MD replicas. The color bar denotes the correspondence between the color code and the number of intermolecular hydrogen bonds.

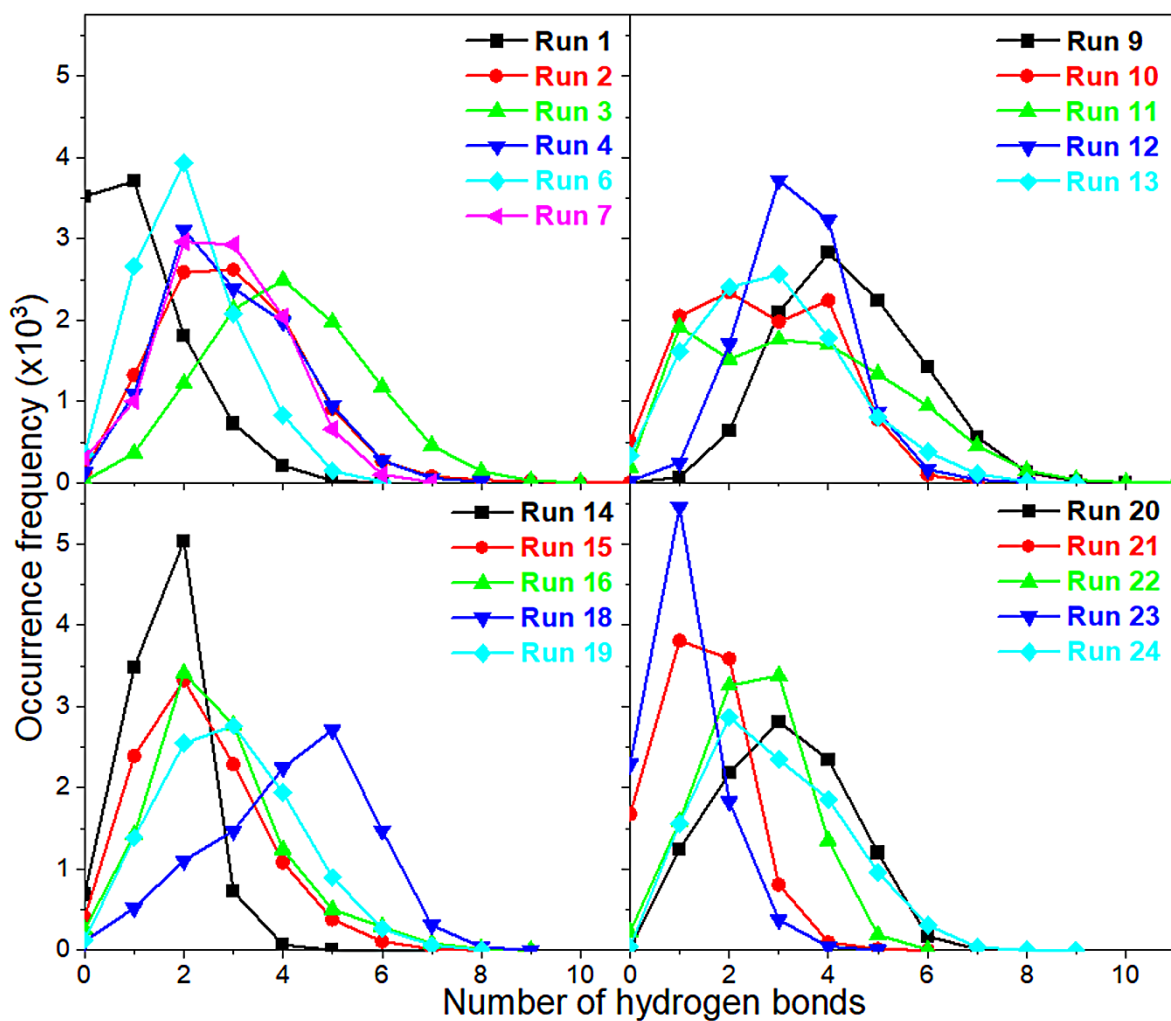

**Figure S15.** Distribution of the occurrence frequency of the number of hydrogen bonds between the nitrogenous bases of dsTRS and N-NTD along the 100 ns MD simulations.

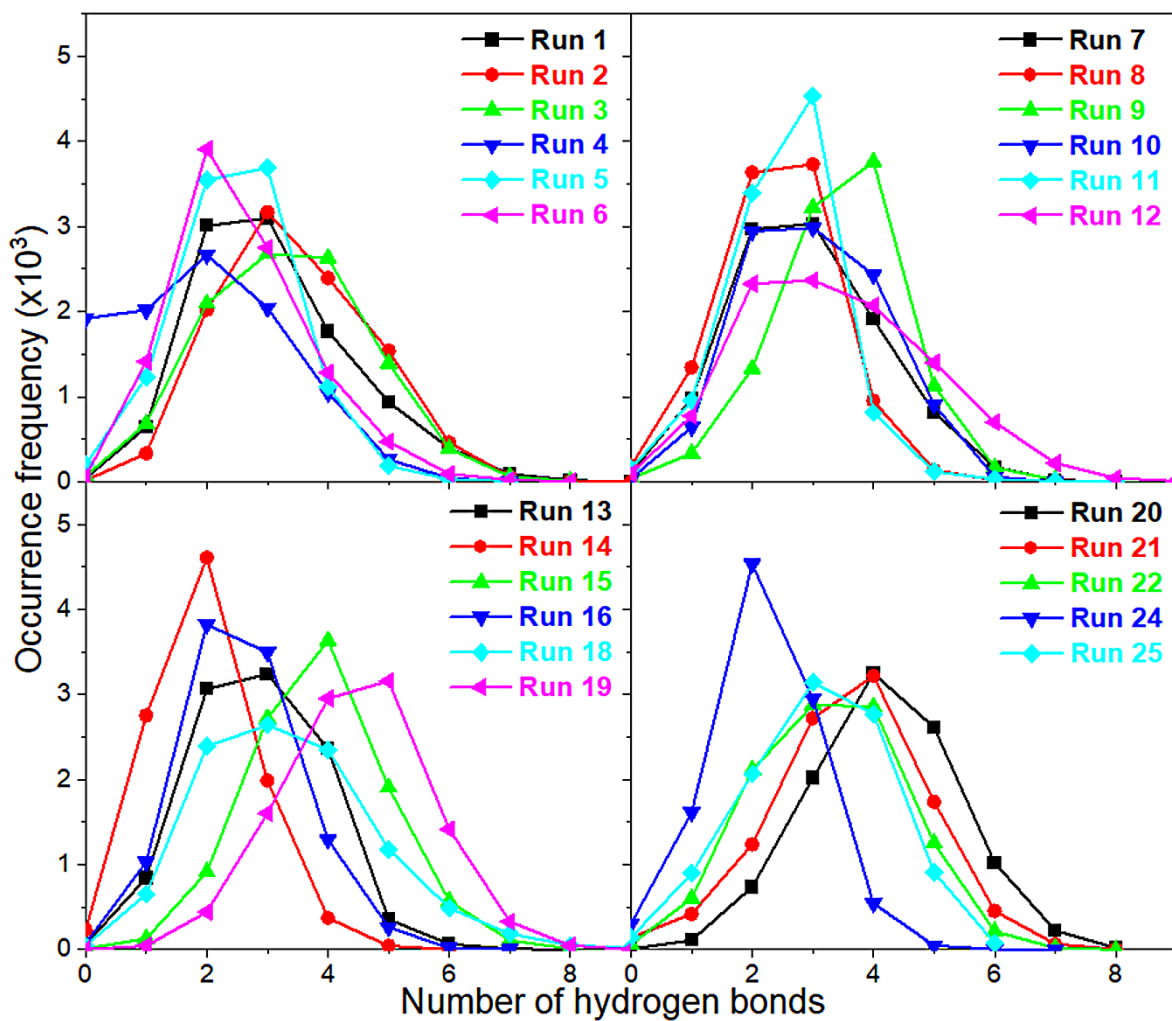

**Figure S16.** Distribution of the occurrence frequency of the number of hydrogen bonds between the nitrogenous bases of dsNS and N-NTD along the 100 ns MD simulations.

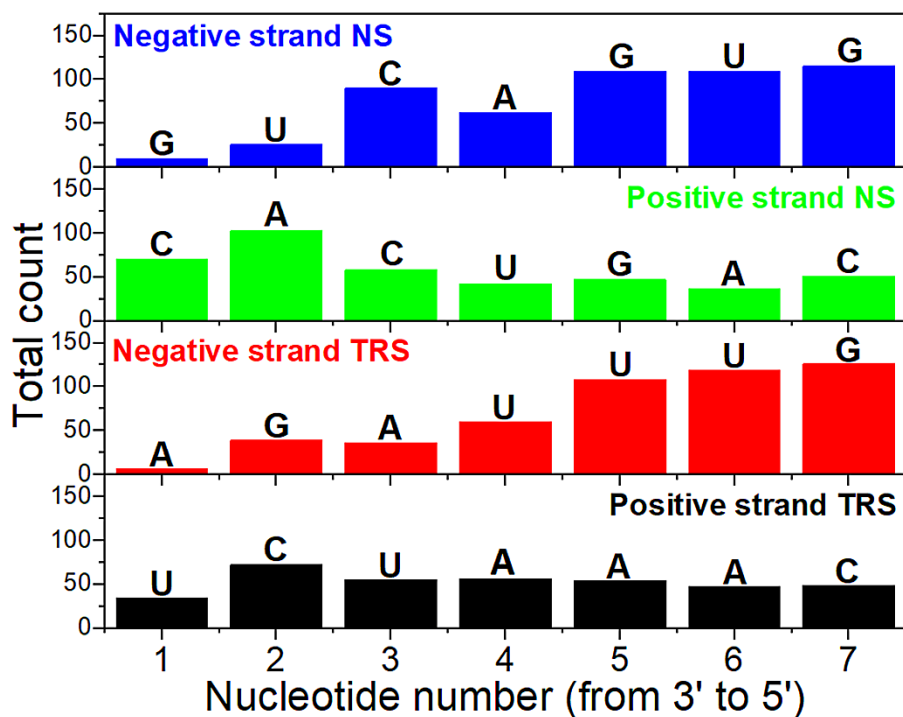

**Figure S17.** Total count of protein-RNA hydrogen bonds with persistency higher than 10% as a function of the residue number for 25 replicas along the 100 ns MD simulations.

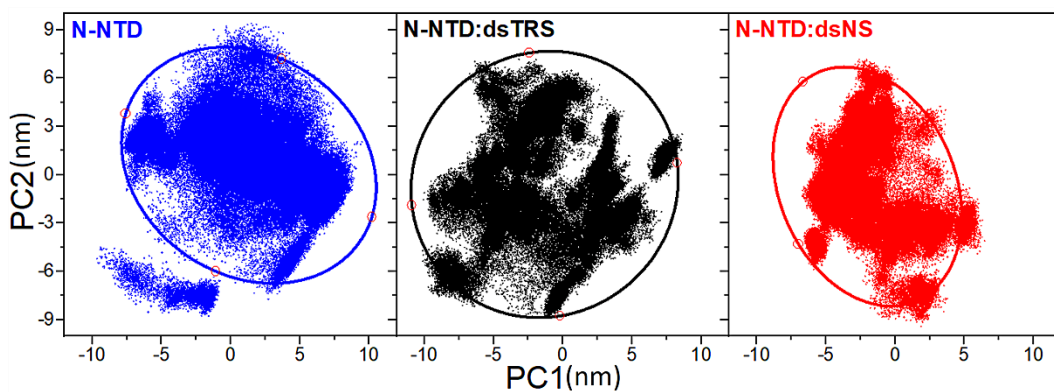

**Figure S18.** PCA scatter plots PC1 and PC2 for free N-NTD (blue dots – *left*) and for N-NTD complexed with either TRS (black dots – *middle*) or NS (red dots – *right*) dsRNAs, using the trajectories of all 25 replicas of free N-NTD concatenated with its bound states. The extent of the conformational space for each scatter plot was measured by fitting an elliptical shell (solid lines) that contains 95% of the density.

## Model 1

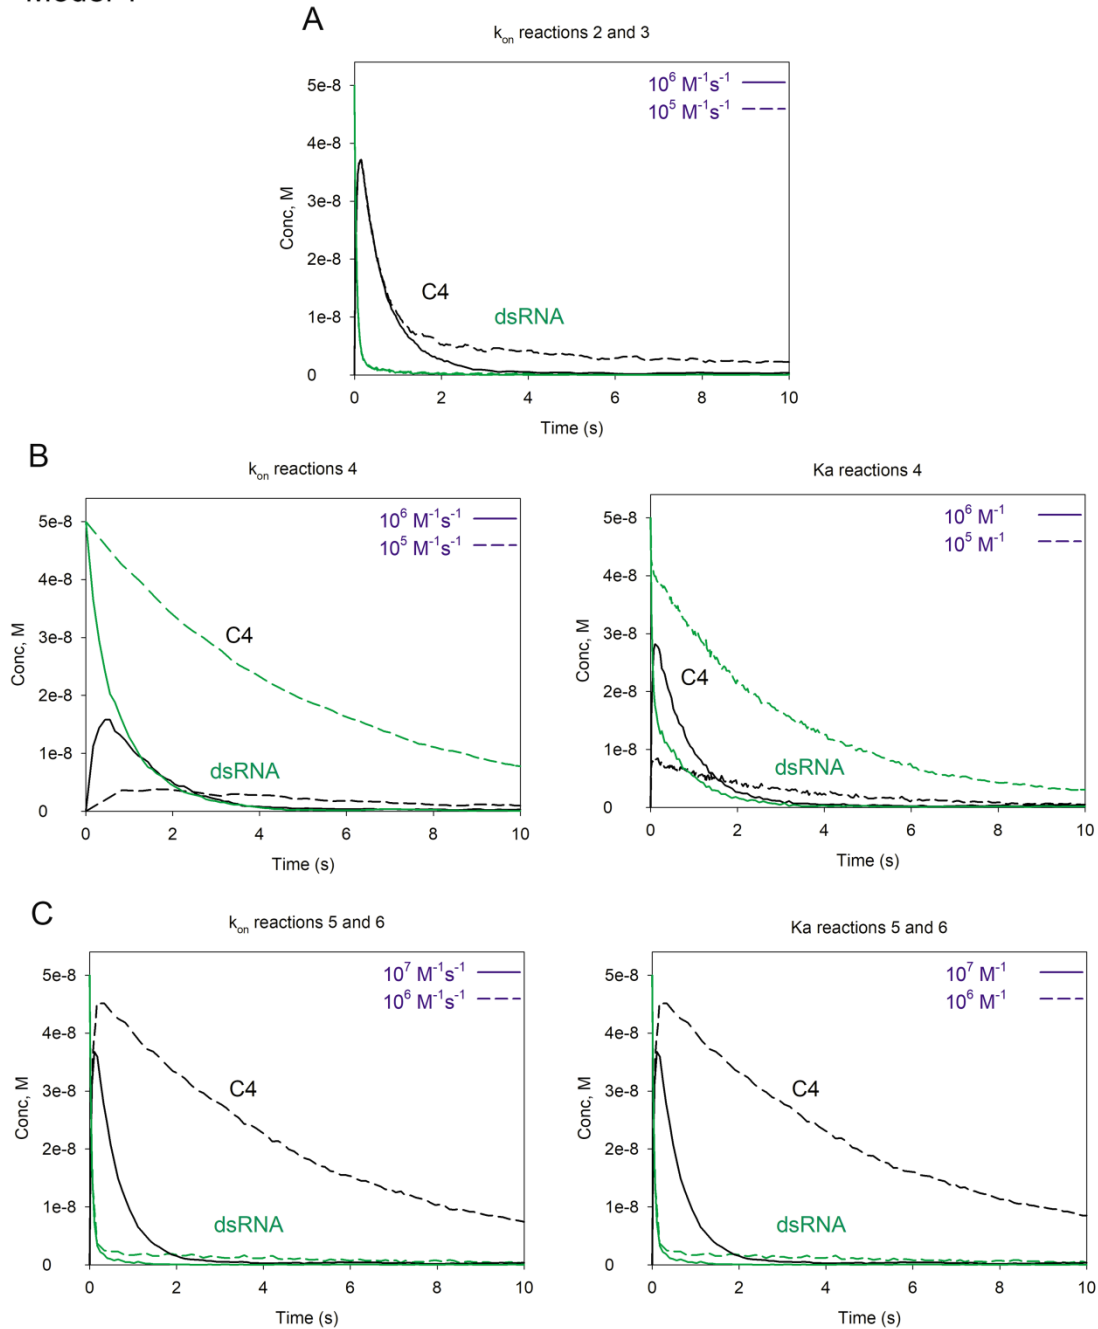

**Figure S19.** Simulations of the reactions progression for the validation of the ranges described in Figure 6A for model 1. A) Effect of the variation of  $k_{on}$  in reaction R2 and R3. Note that  $k_{on} < 10^6 \text{ M}^{-1}\text{s}^{-1}$  makes the reaction too slow to reach equilibrium, violating boundary B4. B) Effect of the variation of  $k_{on}$  (left) and  $K_a$  (right) in reaction R4. Note that  $k_{on} < 10^6 \text{ M}^{-1}\text{s}^{-1}$  or  $K_a < 10^6 \text{ M}^{-1}$  make the reaction too slow to reach equilibrium, violating boundary B4. C) Effect of the variation of  $k_{on}$  (left) and  $K_a$  (right) in reactions R5 and R6. Note that  $k_{on} < 10^6 \text{ M}^{-1}\text{s}^{-1}$  or  $K_a < 10^6 \text{ M}^{-1}$  make the reaction too slow to reach equilibrium, violating boundary B4. For model 1 simulations, we used the following reaction rates:

(R1)  $k_{on} = 4 \times 10^{-1} \text{ M}^{-1} \text{ s}^{-1}$  and  $k_{off} = 8 \times 10^{-4} \text{ s}^{-1}$ ; (R2, R3)  $k_{on} = 4 \times 10^7 \text{ M}^{-1} \text{ s}^{-1}$  and  $k_{off} = 1 \text{ s}^{-1}$ ;  
 (R4)  $k_{on} = 1 \times 10^7 \text{ M}^{-1} \text{ s}^{-1}$  and  $k_{off} = 1 \text{ s}^{-1}$ ; (R5, R6)  $k_{on} = 4 \times 10^7 \text{ M}^{-1} \text{ s}^{-1}$  and  $k_{off} = 1 \text{ s}^{-1}$  (red).

### Model 2a

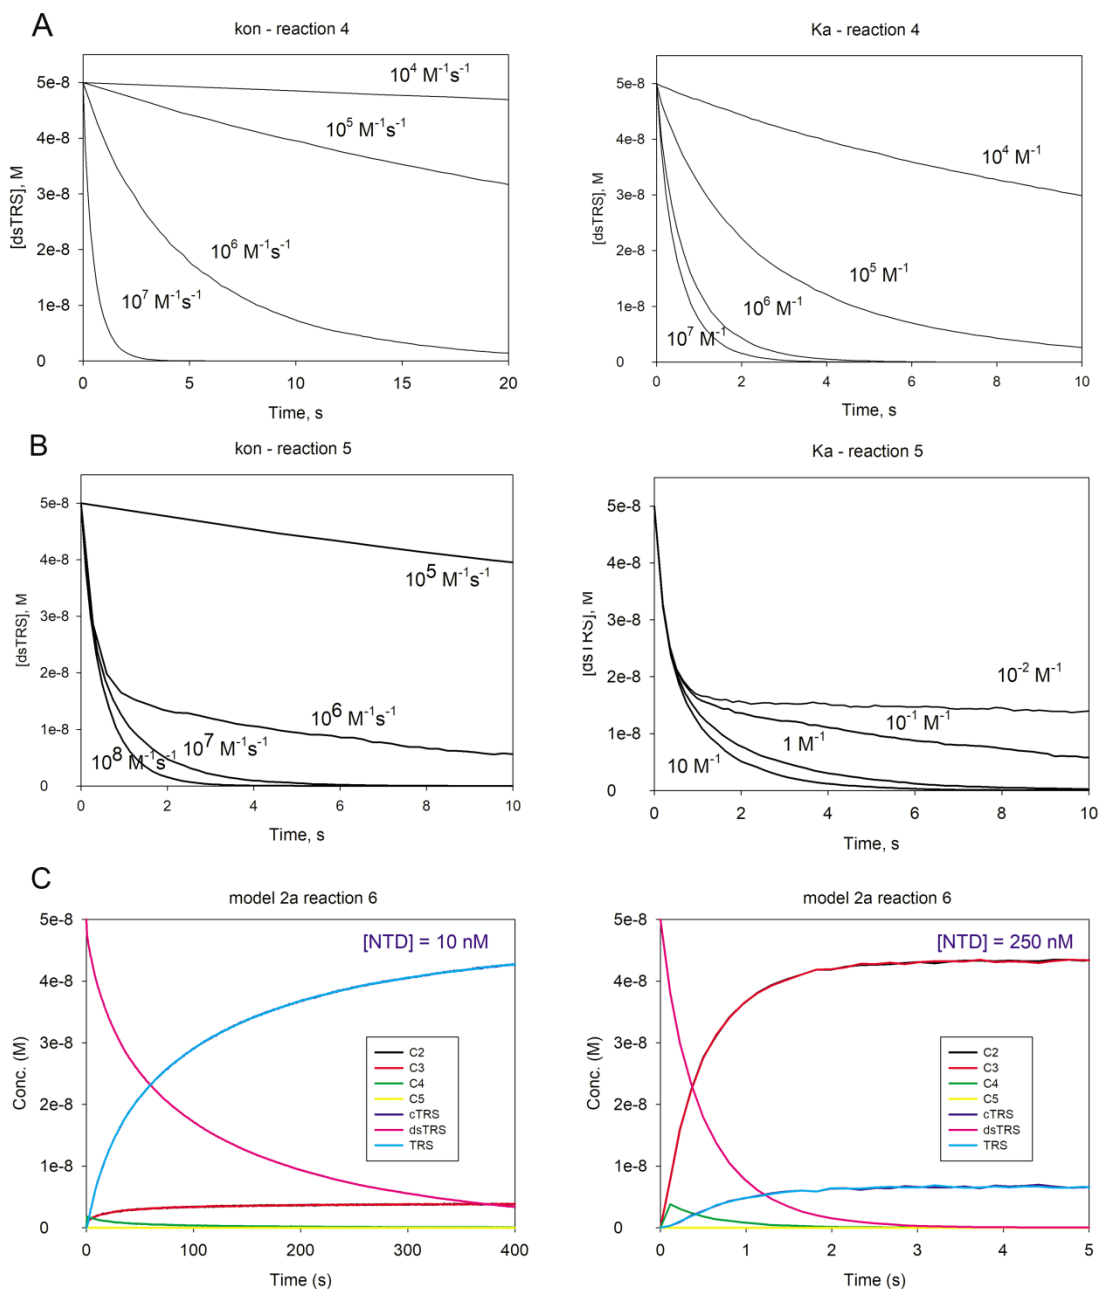

**Figure S20.** Simulations of the reactions progression for the validation of the ranges described in Figure 6A for model 2a. A) Effect of the variation of  $k_{on}$  (left) and  $K_a$  (right) in reaction R4. Note that  $k_{on} < 10^6 \text{ M}^{-1} \text{ s}^{-1}$  or  $K_a < 10^5 \text{ M}^{-1}$  make the reaction too slow to reach equilibrium, violating boundary B4. B) Effect of the variation of  $k_{on}$  (left) and  $K_a$  (right) in reaction R5. Note that  $k_{on} < 10^7 \text{ M}^{-1} \text{ s}^{-1}$  or  $K_a < 1 \text{ M}^{-1}$  make the reaction too slow to reach

equilibrium, violating boundary B4. C) Time course of the reaction R6 for each of the components. For model 2a, for  $10^7 > K_a > 10^{-6} \text{ M}^{-1}$ , there is never accumulation of C5, resulting in a kinetic of dsRNA melting independent of  $k_{on}$  and  $k_{off}$  at fixed concentrations of N-NTD. The kinetics changes considerably with the [N-NTD] as showed in the figure. For values of  $K_a > 10^7 \text{ M}^{-1}$  we observed the transition to model 2b with accumulation of C5. Note that for reactions R2 and R3,  $K_a$  was determined experimentally ( $4 \times 10^7 \text{ M}^{-1}$ ). Particularly for model 2a, the kinetic of dsRNA melting is independent of  $k_{on}$  and  $k_{off}$  of reactions R2 and R3, at fixed concentrations of N-NTD. For model 2a simulations, we used the following reaction rates: (R1)  $k_{on} = 4 \times 10^{-1} \text{ M}^{-1} \text{ s}^{-1}$  and  $k_{off} = 8 \times 10^{-4} \text{ s}^{-1}$ ; (R2, R3)  $k_{on} = 4 \times 10^7 \text{ M}^{-1} \text{ s}^{-1}$  and  $k_{off} = 1 \text{ s}^{-1}$ ; (R4)  $k_{on} = 1 \times 10^7 \text{ M}^{-1} \text{ s}^{-1}$  and  $k_{off} = 1 \text{ s}^{-1}$ ; (R5)  $k_{on} = 1 \times 10^8 \text{ M}^{-1} \text{ s}^{-1}$  and  $k_{off} = 1 \text{ s}^{-1}$  and (R6)  $k_{on} = 1 \times 10^8 \text{ M}^{-1} \text{ s}^{-1}$  and  $k_{off} = 1 \times 10^{-1} \text{ s}^{-1}$ .



## Model 2b

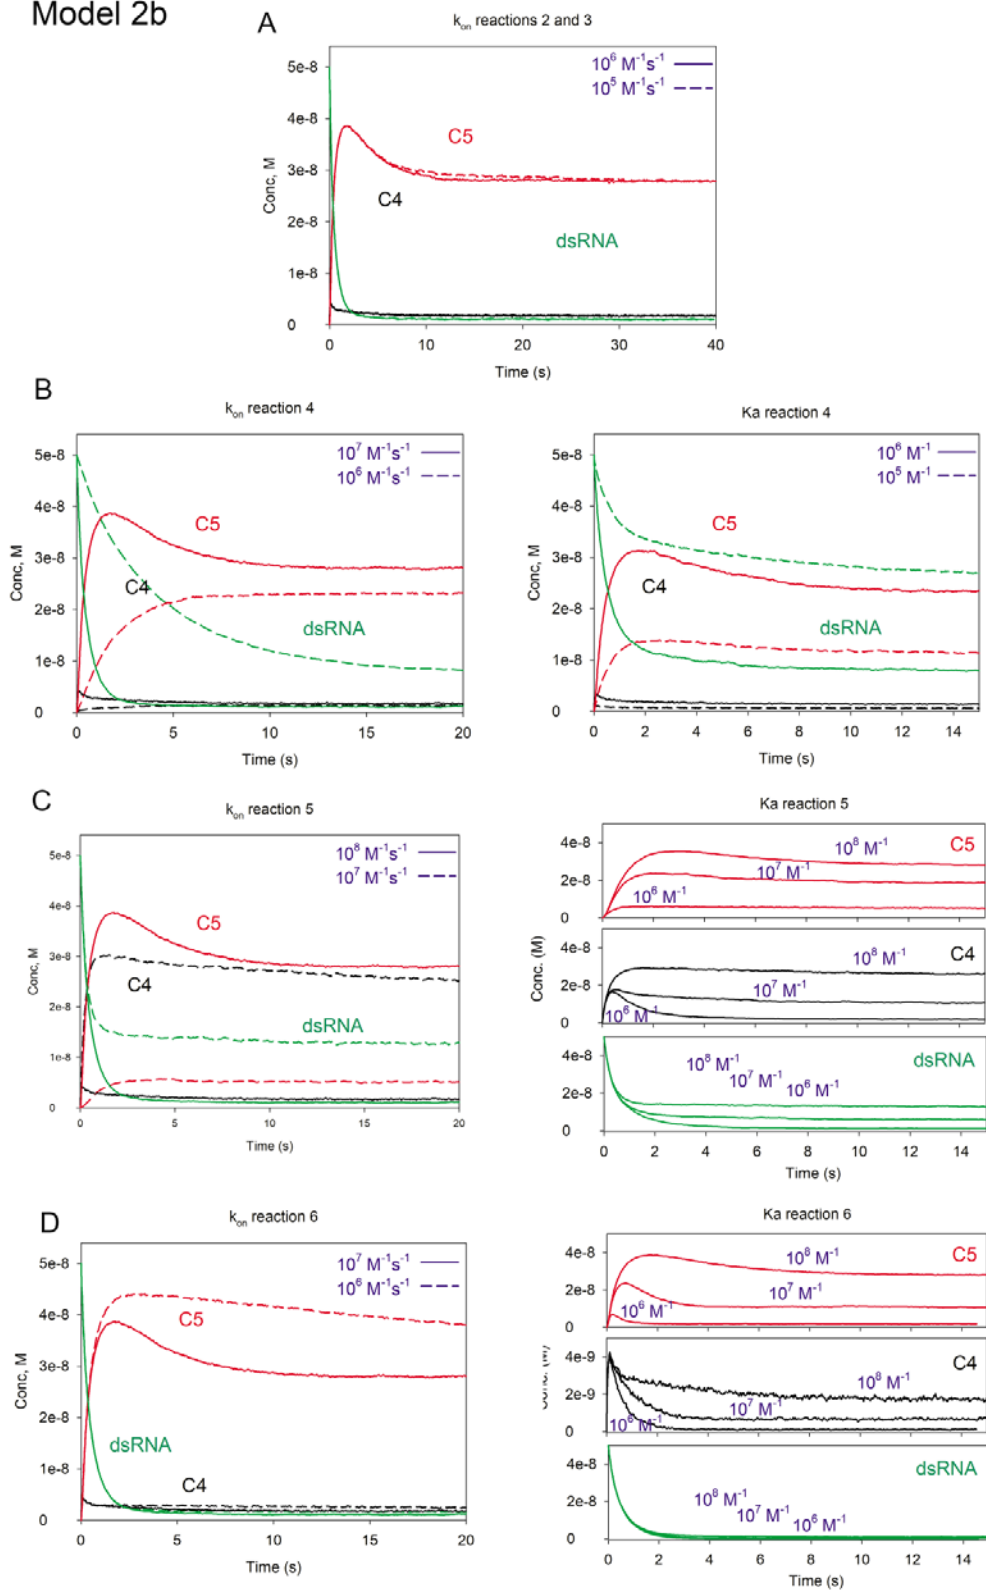

**Figure S21.** Simulations of the reactions progression for the validation of the ranges described in Figure 6A for model 2b. A) Effect of the variation of  $k_{on}$  in reactions R2 and

R3. Note that  $k_{on} < 10^6 \text{ M}^{-1}\text{s}^{-1}$  makes the reaction too slow to reach equilibrium, violating boundary B4. B) Effect of the variation of  $k_{on}$  (left) and  $K_a$  (right) in reaction R4. Note that  $k_{on} < 10^7 \text{ M}^{-1}\text{s}^{-1}$  or  $K_a < 10^6 \text{ M}^{-1}$  make the reaction too slow to reach equilibrium, violating boundary B4. C) Effect of the variation of  $k_{on}$  (left) and  $K_a$  (right) in reaction R5. Note that  $k_{on} < 10^7 \text{ M}^{-1}\text{s}^{-1}$  or  $K_a < 10^7 \text{ M}^{-1}$  make the reaction too slow to reach equilibrium, violating boundary B4. D) Effect of the variation of  $k_{on}$  (left) and  $K_a$  (right) in reaction R6. Note that  $k_{on} < 10^6 \text{ M}^{-1}\text{s}^{-1}$  or  $K_a < 10^7 \text{ M}^{-1}$  make the reaction too slow to reach equilibrium, violating boundary B4. For model 2b simulations, we used the following reaction rates: (R1)  $k_{on} = 4 \times 10^{-1} \text{ M}^{-1}\text{s}^{-1}$  and  $k_{off} = 8 \times 10^{-4} \text{ s}^{-1}$ ; (R2, R3)  $k_{on} = 4 \times 10^7 \text{ M}^{-1}\text{s}^{-1}$  and  $k_{off} = 1 \text{ s}^{-1}$ ; (R4)  $k_{on} = 1 \times 10^7 \text{ M}^{-1}\text{s}^{-1}$  and  $k_{off} = 1 \text{ s}^{-1}$ ; (R5)  $k_{on} = 1 \times 10^8 \text{ M}^{-1}\text{s}^{-1}$  and  $k_{off} = 1 \text{ s}^{-1}$  and (R6)  $k_{on} = 1 \times 10^8 \text{ M}^{-1}\text{s}^{-1}$  and  $k_{off} = 1 \times 10^{-1} \text{ s}^{-1}$ .

**Table S1.** Protein-RNA hydrogen bonds with percentage of persistence higher than 10% for run 1 of the N-NTD:dsTRS complex.

| Donor              |      | Acceptor           |      | %Persistence |
|--------------------|------|--------------------|------|--------------|
| Amino acid residue | Atom | Nucleotide residue | Atom |              |
| TYR69              | OH   | U9                 | O1P  | 89.971       |
| ARG67              | NH1  | U10                | O2P  | 86.851       |
| ARG67              | NH1  | U9                 | O1P  | 86.201       |
| ARG55              | NE   | U11                | O1P  | 76.722       |
| ARG67              | NH2  | U10                | O2P  | 71.003       |
| ARG55              | NH2  | U11                | O1P  | 69.833       |
| ARG52              | NH2  | U10                | O1P  | 59.824       |
| GLY59              | N    | A12                | O1P  | 55.144       |
| ARG52              | NH1  | U10                | O1P  | 51.005       |
| ARG137             | NH2  | A5                 | O2P  | 48.495       |
| SER11              | N    | G8                 | O5'  | 41.626       |
| GLY57              | N    | U11                | O2P  | 39.596       |
| ARG137             | NH2  | A4                 | O2P  | 38.366       |
| ARG109             | NH2  | G8                 | N7   | 26.437       |
| ASP58              | N    | U11                | O3'  | 26.107       |
| G8                 | O5'  | PHE13              | O    | 25.667       |
| LYS60              | NZ   | G13                | O2P  | 23.258       |
| ARG55              | NH2  | U10                | O3'  | 23.198       |
| ARG137             | NH2  | A6                 | O2P  | 22.958       |
| ARG137             | NH1  | A6                 | O2P  | 18.528       |
| ARG137             | NH1  | A5                 | O2P  | 18.168       |
| SER136             | N    | C2                 | O2P  | 17.718       |
| ASP58              | N    | A12                | O1P  | 17.248       |
| U1                 | O5'  | ALA133             | O    | 17.078       |
| GLY57              | N    | U11                | O1P  | 17.008       |
| ASP58              | N    | A12                | O2P  | 16.048       |
| ARG137             | NH2  | U3                 | O2P  | 12.999       |
| ARG52              | NH1  | U9                 | O3'  | 12.499       |
| U1                 | O5'  | PHE131             | O    | 11.629       |
| LEU5               | N    | U9                 | O2'  | 11.319       |
| G8                 | N2   | PRO6               | O    | 11.269       |

|        |     |     |     |        |
|--------|-----|-----|-----|--------|
| LYS60  | NZ  | A12 | O2P | 10.889 |
| ARG137 | NH2 | C2  | O1P | 10.809 |
| ARG137 | NH1 | A4  | O2P | 10.649 |

**Table S2.** Protein-RNA hydrogen bonds with percentage of persistence higher than 10% for run 2 of the N-NTD:dsTRS complex.

| Donor              |      | Acceptor           |      | %Persistence |
|--------------------|------|--------------------|------|--------------|
| Amino acid residue | Atom | Nucleotide residue | Atom |              |
| ARG137             | NH2  | A4                 | O2P  | 86.341       |
| TYR69              | OH   | U9                 | O2P  | 66.413       |
| TYR132             | OH   | U3                 | O2P  | 65.723       |
| TYR71              | OH   | G8                 | O5'  | 58.024       |
| ARG137             | NH2  | U3                 | O1P  | 57.834       |
| ARG52              | NH2  | U10                | O1P  | 51.605       |
| ARG52              | NE   | U10                | O2P  | 49.785       |
| ARG67              | NH2  | U10                | O4   | 46.965       |
| GLY20              | N    | C2                 | O1P  | 46.155       |
| LYS62              | NZ   | G13                | O6   | 45.335       |
| SER65              | OG   | C2                 | O2P  | 43.236       |
| ARG67              | NH1  | U10                | O4   | 38.716       |
| SER11              | N    | G8                 | O5'  | 37.536       |
| ARG137             | NH1  | U3                 | O1P  | 35.976       |
| ARG52              | NH1  | U9                 | O1P  | 35.806       |
| A5                 | N6   | GLU134             | OE2  | 33.877       |
| ARG137             | NE   | A4                 | O2P  | 32.117       |
| SER11              | N    | G8                 | O4'  | 29.037       |
| ARG52              | NH2  | U10                | O2P  | 25.507       |
| ARG137             | NH2  | U3                 | O5'  | 23.388       |
| LYS60              | NZ   | G13                | O2P  | 23.138       |
| A5                 | N6   | GLU134             | OE1  | 22.968       |
| ARG52              | NH2  | U9                 | O2P  | 19.138       |
| GLY57              | N    | U11                | O2P  | 17.598       |
| ARG52              | NH1  | U9                 | O2P  | 16.108       |
| ARG137             | NE   | A4                 | O1P  | 15.588       |
| ARG137             | NH2  | U3                 | O2P  | 15.048       |
| ARG137             | NH1  | U3                 | O2P  | 14.099       |
| ALA15              | N    | G8                 | O6   | 14.009       |
| GLY57              | N    | U11                | O1P  | 13.279       |
| LYS62              | NZ   | G13                | N7   | 13.209       |
| SER65              | OG   | U1                 | O5'  | 11.659       |
| ARG52              | NH2  | U9                 | O1P  | 10.929       |
| SER11              | N    | G8                 | N7   | 10.819       |
| ARG52              | NH2  | U9                 | O5'  | 10.499       |
| A6                 | N6   | GLU134             | OE2  | 10.199       |

**Table S3.** Protein-RNA hydrogen bonds with percentage of persistence higher than 10% for run 3 of the N-NTD:dsTRS complex.

| Donor              |      | Acceptor           |      | %Persistence |
|--------------------|------|--------------------|------|--------------|
| Amino acid residue | Atom | Nucleotide residue | Atom |              |
| ARG137             | NH2  | A4                 | O2P  | 91.731       |
| G8                 | N2   | PRO111             | O    | 88.321       |
| ARG67              | NH2  | C2                 | O2P  | 84.022       |
| U1                 | O5'  | SER65              | O    | 76.312       |
| ARG52              | NH1  | U10                | O2P  | 75.722       |
| ARG52              | NH1  | U9                 | O1P  | 69.693       |
| ARG137             | NH2  | U3                 | O1P  | 63.674       |
| SER11              | N    | G8                 | O4'  | 62.444       |
| ARG109             | NH1  | G8                 | N3   | 60.694       |
| ARG52              | NH2  | U10                | O2P  | 60.364       |
| ARG137             | NH1  | U3                 | O1P  | 57.674       |
| ARG67              | NE   | C2                 | O2P  | 56.654       |
| ARG109             | NH2  | G8                 | N2   | 51.885       |
| TYR132             | OH   | U3                 | O2P  | 49.315       |
| GLY57              | N    | G13                | N7   | 48.295       |
| ARG55              | NH2  | U9                 | O2P  | 39.746       |
| GLY57              | N    | G13                | O6   | 35.236       |
| ARG55              | NH2  | U10                | O2P  | 30.607       |
| ARG55              | NH1  | U10                | O2P  | 28.607       |
| ASN114             | N    | C7                 | O2'  | 25.517       |
| ARG137             | NE   | A4                 | O2P  | 25.027       |
| ARG55              | NH1  | U9                 | O2P  | 24.278       |
| ALA116             | N    | G8                 | O6   | 23.448       |
| C7                 | O2'  | ALA112             | O    | 22.748       |
| LYS62              | NZ   | U1                 | O4   | 19.228       |
| ARG137             | NH2  | U3                 | O5'  | 18.558       |
| C2                 | N4   | ARG55              | O    | 18.248       |
| ARG67              | NH2  | C2                 | O5'  | 16.658       |
| ASN8               | ND2  | U9                 | O1P  | 14.839       |
| TYR71              | OH   | G8                 | O5'  | 14.509       |
| A12                | N6   | ARG55              | O    | 14.279       |
| ARG137             | NH2  | U3                 | O2P  | 12.839       |
| SER11              | N    | G8                 | O5'  | 12.339       |
| SER140             | OG   | A5                 | O1P  | 11.689       |
| ARG52              | NH2  | U9                 | O1P  | 10.969       |
| ARG52              | NH1  | U9                 | O2P  | 10.769       |

**Table S4.** Protein-RNA hydrogen bonds with percentage of persistence higher than 10% for run 4 of the N-NTD:dsTRS complex.

| Donor              |      | Acceptor           |      | %Persistence |
|--------------------|------|--------------------|------|--------------|
| Amino acid residue | Atom | Nucleotide residue | Atom |              |
| TYR69              | OH   | U9                 | O2P  | 73.193       |
| GLY20              | N    | C2                 | O1P  | 54.375       |

|        |     |        |     |        |
|--------|-----|--------|-----|--------|
| SER11  | N   | G8     | O5' | 52.735 |
| ARG137 | NH2 | A5     | O2P | 51.935 |
| A6     | N6  | GLU134 | OE1 | 51.705 |
| ARG52  | NH2 | U11    | O2P | 41.666 |
| ARG137 | NH2 | A4     | O2P | 38.346 |
| TYR71  | OH  | G8     | O5' | 36.966 |
| ARG137 | NE  | A5     | O2P | 36.126 |
| HIS19  | NE2 | U3     | O2P | 32.097 |
| ARG67  | NH2 | U9     | O2P | 32.037 |
| SER11  | N   | G8     | O4' | 31.597 |
| SER65  | OG  | C2     | O2P | 30.627 |
| A6     | N6  | GLU134 | OE2 | 30.107 |
| LYS62  | NZ  | A14    | N7  | 29.667 |
| U1     | O5' | ASP63  | O   | 27.647 |
| A14    | N6  | ASP63  | O   | 27.547 |
| C7     | N4  | GLU134 | OE2 | 26.977 |
| GLY20  | N   | C2     | O2P | 25.517 |
| HIS19  | NE2 | U3     | O1P | 25.117 |
| C7     | N4  | GLU134 | OE1 | 23.288 |
| SER140 | N   | A6     | O1P | 21.028 |
| GLY139 | N   | A5     | O1P | 21.008 |
| ARG52  | NE  | U10    | O2P | 19.868 |
| ARG67  | NE  | U9     | O2P | 19.368 |
| G8     | N2  | MET3   | O   | 18.938 |
| ARG52  | NH1 | U11    | O2P | 18.268 |
| SER140 | OG  | A6     | O1P | 18.168 |
| ARG137 | NH1 | A4     | O2P | 16.888 |
| ARG52  | NH2 | U10    | O2P | 16.198 |
| GLY57  | N   | G13    | O2P | 15.368 |
| U9     | O2' | ALA2   | O   | 13.789 |
| ARG52  | NH1 | U10    | O2P | 13.439 |
| ARG137 | NH2 | A4     | O1P | 13.109 |
| ARG67  | NH2 | U9     | O1P | 12.069 |
| GLY139 | N   | A6     | O1P | 11.709 |
| ARG52  | NH2 | U10    | O1P | 10.989 |
| SER140 | OG  | A5     | O1P | 10.679 |
| SER140 | N   | A5     | O1P | 10.539 |

**Table S5.** Protein-RNA hydrogen bonds with percentage of persistence higher than 10% for run 5 of the N-NTD:dsTRS complex.

| Donor              |      | Acceptor           |      | %Persistence |
|--------------------|------|--------------------|------|--------------|
| Amino acid residue | Atom | Nucleotide residue | Atom |              |
| A12                | N6   | ARG53              | O    | 49.125       |
| ARG55              | NH2  | A12                | O2P  | 45.235       |
| ARG53              | NH1  | U10                | O2P  | 43.846       |
| GLY138             | N    | C2                 | O2P  | 33.467       |
| ASN8               | ND2  | G8                 | O2'  | 32.547       |
| C2                 | N4   | GLU134             | OE2  | 26.847       |

|        |     |        |     |        |
|--------|-----|--------|-----|--------|
| ARG55  | NH1 | U11    | O2P | 26.437 |
| ARG53  | NH2 | U11    | O2P | 26.187 |
| GLY1   | N   | C7     | O2  | 25.087 |
| ARG53  | NH2 | U9     | O2P | 23.678 |
| TYR69  | OH  | U9     | O4  | 21.638 |
| ARG55  | NH2 | U11    | O5' | 21.528 |
| ARG55  | NH2 | A12    | O1P | 19.128 |
| C2     | N4  | GLU134 | OE1 | 19.128 |
| ARG137 | NH2 | U3     | O2P | 18.888 |
| ARG137 | NH1 | U3     | O2P | 18.668 |
| ARG53  | NH1 | U9     | O5' | 18.318 |
| GLY135 | N   | U3     | O4  | 17.818 |
| ASN8   | N   | G8     | N2  | 17.578 |
| U3     | N3  | GLU134 | OE1 | 17.448 |
| U1     | O5' | ALA133 | O   | 16.808 |
| ARG55  | NH2 | U11    | O2P | 16.268 |
| G8     | N2  | ASN7   | OD1 | 15.448 |
| ARG53  | NH1 | U9     | O2P | 15.418 |
| A4     | N6  | GLU134 | OE1 | 14.829 |
| U1     | O5' | SER136 | O   | 13.989 |
| ARG137 | NE  | C2     | O2P | 13.969 |
| ARG137 | NH1 | C2     | O2P | 13.769 |
| SER11  | N   | G8     | O4' | 13.479 |
| ARG55  | NH2 | U11    | O1P | 13.169 |
| SER140 | OG  | C2     | O1P | 12.949 |
| ARG53  | NH2 | U10    | O2P | 12.749 |
| TYR69  | OH  | U9     | O2P | 12.669 |
| U3     | N3  | GLU134 | OE2 | 12.539 |
| ARG53  | NH2 | U9     | O1P | 11.959 |
| GLY1   | N   | U9     | O2' | 11.909 |
| ARG55  | NH1 | A12    | O2P | 11.419 |
| ASN7   | ND2 | G8     | O2' | 10.639 |
| ARG137 | NH2 | C2     | O2P | 10.619 |
| ARG67  | NH2 | A4     | N1  | 10.469 |
| LEU5   | N   | C7     | O2  | 10.379 |

**Table S6.** Protein-RNA hydrogen bonds with percentage of persistence higher than 10% for run 6 of the N-NTD:dsTRS complex.

| Donor              |      | Acceptor           |      | %Persistence |
|--------------------|------|--------------------|------|--------------|
| Amino acid residue | Atom | Nucleotide residue | Atom |              |
| G8                 | N2   | PRO111             | O    | 86.671       |
| ARG67              | NH2  | C2                 | O2P  | 69.403       |
| ARG52              | NH1  | U9                 | O2P  | 67.093       |
| ASN8               | ND2  | U9                 | O1P  | 61.044       |
| SER11              | N    | G8                 | O4'  | 58.784       |
| ARG137             | NH2  | U3                 | O2P  | 56.054       |
| ARG137             | NH1  | U3                 | O1P  | 54.095       |
| ARG52              | NH2  | U9                 | O2P  | 53.275       |

|        |     |        |     |        |
|--------|-----|--------|-----|--------|
| G8     | O2' | ASN8   | OD1 | 53.085 |
| SER65  | N   | U1     | O5' | 48.425 |
| ARG67  | NH1 | C2     | O2P | 48.105 |
| LYS62  | NZ  | G13    | O6  | 44.366 |
| ARG137 | NH2 | A4     | O2P | 25.317 |
| C7     | O2' | ALA112 | O   | 24.528 |
| ARG109 | NH2 | G8     | N3  | 23.758 |
| ARG137 | NH2 | U3     | O1P | 20.458 |
| TYR69  | OH  | G8     | O5' | 17.708 |
| GLY57  | N   | A12    | O2P | 16.808 |
| ALA116 | N   | G8     | O6  | 14.799 |
| ARG137 | NH1 | C2     | O1P | 14.039 |
| TYR132 | OH  | C2     | O1P | 13.669 |
| LYS60  | NZ  | A12    | O2P | 13.179 |
| ARG137 | NE  | A4     | O1P | 12.799 |
| U1     | O5' | ASP63  | O   | 11.019 |
| LYS60  | NZ  | U11    | O1P | 10.039 |

**Table S7.** Protein-RNA hydrogen bonds with percentage of persistence higher than 10% for run 7 of the N-NTD:dsTRS complex.

| Donor              |      | Acceptor           |      | %Persistence |
|--------------------|------|--------------------|------|--------------|
| Amino acid residue | Atom | Nucleotide residue | Atom |              |
| ARG137             | NH2  | A4                 | O2P  | 97.16        |
| ARG67              | NH2  | C2                 | O2P  | 89.071       |
| ARG67              | NH1  | C2                 | O2P  | 80.562       |
| SER11              | N    | G8                 | O4'  | 79.992       |
| LYS62              | NZ   | G13                | O6   | 76.422       |
| ARG52              | NH2  | U10                | O1P  | 75.512       |
| SER65              | N    | U1                 | O5'  | 75.422       |
| ARG52              | NH1  | U9                 | O1P  | 61.304       |
| ASN8               | ND2  | U9                 | O1P  | 58.334       |
| ARG52              | NE   | U10                | O2P  | 53.455       |
| ARG137             | NE   | A4                 | O1P  | 49.365       |
| ARG137             | NH2  | U3                 | O2P  | 49.315       |
| LYS60              | NZ   | A12                | O2P  | 44.816       |
| G8                 | O2'  | ASN8               | OD1  | 42.886       |
| ARG137             | NE   | A4                 | O2P  | 41.996       |
| SER140             | N    | A6                 | O2P  | 39.916       |
| SER140             | OG   | A6                 | O1P  | 37.576       |
| A5                 | N6   | GLU134             | OE1  | 37.456       |
| A5                 | N6   | GLU134             | OE2  | 35.466       |
| ARG109             | NH1  | G8                 | N3   | 33.557       |
| ARG137             | NH2  | U3                 | O1P  | 32.707       |
| ARG137             | NH1  | U3                 | O1P  | 31.147       |
| GLY139             | N    | A5                 | O1P  | 23.978       |
| ASN113             | ND2  | U9                 | O2'  | 23.348       |
| ASP58              | N    | U11                | O1P  | 20.628       |
| ARG109             | NH2  | G8                 | N3   | 18.708       |

|        |     |        |     |        |
|--------|-----|--------|-----|--------|
| ALA116 | N   | C7     | N4  | 17.628 |
| ARG52  | NE  | U10    | O1P | 17.258 |
| G8     | N2  | ASN113 | OD1 | 16.218 |
| ASN113 | ND2 | C7     | O2  | 15.648 |
| LYS60  | NZ  | U11    | O1P | 15.118 |
| ASN8   | ND2 | G8     | O3' | 11.479 |
| LYS60  | NZ  | A12    | O1P | 10.109 |

**Table S8.** Protein-RNA hydrogen bonds with percentage of persistence higher than 10% for run 8 of the N-NTD:dsTRS complex.

| Donor              |      | Acceptor           |      | %Persistence |
|--------------------|------|--------------------|------|--------------|
| Amino acid residue | Atom | Nucleotide residue | Atom |              |
| ARG137             | NH2  | A4                 | O2P  | 82.132       |
| G8                 | N2   | PRO111             | O    | 80.852       |
| ARG137             | NH1  | U3                 | O2P  | 76.952       |
| ARG52              | NH2  | U10                | O2P  | 64.894       |
| ARG52              | NH1  | U10                | O2P  | 62.964       |
| GLY57              | N    | A12                | O2P  | 61.324       |
| A14                | N6   | LYS62              | O    | 56.154       |
| GLY135             | N    | C2                 | O1P  | 54.405       |
| ARG137             | NH2  | U3                 | O2P  | 53.525       |
| MET3               | N    | U9                 | O2'  | 51.275       |
| SER65              | N    | U1                 | O4'  | 50.005       |
| GLY135             | N    | C2                 | O2P  | 43.826       |
| TYR71              | OH   | G8                 | O5'  | 41.916       |
| ARG52              | NH1  | U9                 | O1P  | 41.696       |
| LYS62              | NZ   | G13                | N7   | 38.956       |
| LYS62              | NZ   | G13                | O6   | 37.396       |
| C7                 | O3'  | ALA112             | O    | 35.906       |
| ARG109             | NH2  | G8                 | N3   | 35.036       |
| SER11              | N    | G8                 | O5'  | 27.037       |
| SER11              | N    | G8                 | O4'  | 24.868       |
| HIS19              | NE2  | U1                 | O2'  | 23.508       |
| ARG137             | NH2  | U3                 | O5'  | 22.778       |
| HIS19              | NE2  | C2                 | O1P  | 20.788       |
| ARG109             | NH2  | G8                 | N2   | 20.388       |
| ARG52              | NH2  | U9                 | O1P  | 20.178       |
| ARG109             | NH1  | G8                 | N2   | 16.878       |
| U9                 | O2'  | MET3               | O    | 16.308       |
| ARG52              | NH2  | U10                | O1P  | 16.038       |
| ARG67              | NH1  | U9                 | O4   | 15.498       |
| C7                 | O2'  | ALA112             | O    | 15.158       |
| C7                 | O2'  | ASN114             | O    | 15.128       |
| ARG109             | NH1  | G8                 | N3   | 14.399       |
| ASN8               | ND2  | G8                 | O2'  | 13.289       |
| ASN8               | ND2  | G8                 | O3'  | 11.999       |
| LYS60              | NZ   | G13                | O2P  | 11.669       |
| SER65              | N    | U1                 | O2   | 11.479       |



|       |     |    |     |        |
|-------|-----|----|-----|--------|
| ARG52 | NH1 | U9 | O2P | 11.309 |
| ARG52 | NE  | U9 | O2P | 10.269 |

**Table S9.** Protein-RNA hydrogen bonds with percentage of persistence higher than 10% for run 9 of the N-NTD:dsTRS complex.

| Donor              |      | Acceptor           |      | %Persistence |
|--------------------|------|--------------------|------|--------------|
| Amino acid residue | Atom | Nucleotide residue | Atom |              |
| G8                 | N2   | PRO111             | O    | 99.08        |
| ASN8               | ND2  | U9                 | O1P  | 86.611       |
| ARG109             | NH1  | G8                 | N3   | 85.681       |
| SER11              | N    | G8                 | O4'  | 79.372       |
| ARG67              | NH2  | C2                 | O2P  | 77.212       |
| ARG52              | NH2  | U11                | O2P  | 76.132       |
| ARG52              | NE   | U10                | O2P  | 71.663       |
| C7                 | O2'  | ALA112             | O    | 61.164       |
| ARG109             | NH2  | G8                 | N2   | 59.704       |
| G8                 | O2'  | ASN8               | OD1  | 58.664       |
| ARG137             | NH1  | A5                 | O2P  | 54.065       |
| LYS62              | NZ   | G13                | O6   | 48.295       |
| ARG52              | NH2  | U10                | O2P  | 45.505       |
| ARG55              | NH2  | U11                | O1P  | 42.186       |
| ARG137             | NH2  | A4                 | O1P  | 42.006       |
| ARG55              | NH1  | U11                | O2P  | 35.626       |
| ARG52              | NH2  | U10                | O5'  | 35.026       |
| ARG137             | NH1  | A4                 | O5'  | 33.207       |
| A6                 | N6   | SER136             | OG   | 32.387       |
| TYR132             | OH   | U3                 | O2P  | 31.307       |
| ARG137             | NH2  | A4                 | O2P  | 28.827       |
| ARG137             | NH1  | A4                 | O1P  | 25.097       |
| ARG55              | NH1  | U10                | O1P  | 24.578       |
| ARG53              | N    | U9                 | O1P  | 23.738       |
| C7                 | N4   | GLY138             | O    | 22.288       |
| SER136             | OG   | A6                 | N7   | 22.028       |
| ARG67              | NH1  | C2                 | O2P  | 20.618       |
| ARG53              | NH2  | U10                | O1P  | 19.758       |
| LYS60              | NZ   | A12                | O2P  | 18.438       |
| ARG55              | NH2  | U11                | O2P  | 17.558       |
| ARG137             | N    | A5                 | O1P  | 16.428       |
| SER136             | OG   | A6                 | O2P  | 16.028       |
| LYS62              | NZ   | U1                 | O4   | 14.489       |
| ARG53              | NE   | U10                | O1P  | 14.299       |
| ARG52              | NH1  | U10                | O2P  | 14.199       |
| ARG137             | NH1  | A4                 | O2P  | 14.149       |
| ARG55              | NH2  | A12                | O2P  | 13.959       |
| ARG55              | NH1  | U11                | O1P  | 12.549       |
| ARG52              | NH1  | U11                | O2P  | 11.389       |

**Table S10.** Protein-RNA hydrogen bonds with percentage of persistence higher than 10% for run 10 of the N-NTD:dsTRS complex.

| Donor              |      | Acceptor           |      | %Persistence |
|--------------------|------|--------------------|------|--------------|
| Amino acid residue | Atom | Nucleotide residue | Atom |              |
| ASN8               | ND2  | U9                 | O1P  | 95.73        |
| SER11              | N    | G8                 | O4'  | 85.051       |
| G8                 | O2'  | ASN8               | OD1  | 81.052       |
| ARG52              | NH1  | U9                 | O2P  | 68.343       |
| ARG52              | NH1  | U10                | O2P  | 67.613       |
| ARG52              | NH2  | U10                | O2P  | 61.284       |
| G8                 | N2   | ALA112             | O    | 50.995       |
| LYS62              | NZ   | G13                | O6   | 43.876       |
| ASN113             | ND2  | U9                 | O2   | 39.476       |
| GLY139             | N    | A4                 | O1P  | 34.637       |
| ARG67              | NH2  | C2                 | O2P  | 34.177       |
| SER65              | OG   | C2                 | O2P  | 33.887       |
| SER140             | N    | A5                 | O1P  | 32.147       |
| THR14              | OG1  | G8                 | O6   | 31.217       |
| G8                 | N2   | PRO111             | O    | 28.877       |
| SER140             | OG   | A5                 | O1P  | 27.357       |
| ARG53              | NE   | U9                 | O1P  | 27.327       |
| ARG53              | NH2  | U9                 | O1P  | 22.408       |
| ASN113             | ND2  | U10                | O4'  | 22.008       |
| ARG52              | NH1  | U9                 | O1P  | 21.678       |
| ARG137             | NH2  | A4                 | O2P  | 19.688       |
| ASN114             | N    | G8                 | N2   | 17.608       |
| ARG67              | NH1  | C2                 | O2P  | 17.388       |
| ARG53              | NH2  | G8                 | O3'  | 17.348       |
| ARG55              | NH1  | U11                | O2P  | 16.328       |
| ARG55              | NH2  | A12                | O2P  | 14.249       |
| C7                 | O2'  | ALA112             | O    | 13.959       |
| ASN114             | N    | C7                 | O2   | 13.819       |
| SER140             | OG   | A4                 | O3'  | 13.199       |
| U1                 | O5'  | ASP63              | O    | 12.209       |
| ARG137             | NH1  | A4                 | O2P  | 11.969       |
| SER65              | OG   | U1                 | O5'  | 11.059       |
| C7                 | O3'  | ASN113             | O    | 10.749       |
| GLY139             | N    | A5                 | O1P  | 10.439       |

**Table S11.** Protein-RNA hydrogen bonds with percentage of persistence higher than 10% for run 11 of the N-NTD:dsTRS complex.

| Donor              |      | Acceptor           |      | %Persistence |
|--------------------|------|--------------------|------|--------------|
| Amino acid residue | Atom | Nucleotide residue | Atom |              |
| ARG137             | NH1  | A5                 | O2P  | 74.893       |
| C7                 | O2'  | ALA116             | O    | 44.726       |
| ARG137             | NH2  | A4                 | O2P  | 43.476       |
| ARG67              | NH2  | C2                 | O2P  | 42.776       |

|        |     |        |     |        |
|--------|-----|--------|-----|--------|
| ARG137 | NH2 | A4     | O1P | 42.736 |
| ARG109 | NH2 | G8     | N3  | 41.366 |
| SER65  | OG  | C2     | O2P | 38.096 |
| A6     | N6  | GLU134 | OE2 | 38.036 |
| TYR69  | OH  | G8     | N7  | 32.767 |
| ARG137 | NH1 | A4     | O5' | 31.467 |
| C2     | N4  | ASP63  | O   | 31.467 |
| LYS62  | NZ  | G13    | O6  | 30.467 |
| ARG137 | NH1 | A4     | O1P | 29.627 |
| A6     | N6  | GLU134 | OE1 | 28.987 |
| ARG52  | NH1 | U9     | O1P | 28.437 |
| ALA116 | N   | C7     | O2  | 23.388 |
| ARG137 | NH1 | A4     | O2P | 23.288 |
| ARG52  | NH2 | U10    | O1P | 23.018 |
| SER11  | N   | G8     | O4' | 21.028 |
| ARG52  | NH2 | U10    | O2P | 19.338 |
| ARG53  | N   | U9     | O2P | 17.758 |
| ARG52  | NE  | U10    | O2P | 16.358 |
| ARG67  | NH1 | C2     | O2P | 16.128 |
| LYS62  | NZ  | G13    | N7  | 14.779 |
| G8     | O5' | THR51  | O   | 14.299 |
| ASN8   | ND2 | U9     | O1P | 14.059 |
| A5     | N6  | GLU134 | OE2 | 13.409 |
| GLY139 | N   | C7     | O2P | 12.949 |
| LYS60  | NZ  | A12    | O2P | 12.929 |
| A5     | N6  | GLU134 | OE1 | 12.629 |
| ARG52  | NE  | U9     | O2P | 12.349 |
| ARG53  | NH1 | U9     | O1P | 11.029 |
| ARG137 | NH2 | A5     | O2P | 11.019 |
| LYS60  | NZ  | U11    | O1P | 10.119 |

**Table S12.** Protein-RNA hydrogen bonds with percentage of persistence higher than 10% for run 12 of the N-NTD:dsTRS complex.

| Donor              |      | Acceptor           |      | %Persistence |
|--------------------|------|--------------------|------|--------------|
| Amino acid residue | Atom | Nucleotide residue | Atom |              |
| SER11              | N    | G8                 | O4'  | 91.081       |
| ALA15              | N    | G8                 | O6   | 88.661       |
| ASN8               | ND2  | U9                 | O1P  | 64.134       |
| ARG52              | NH1  | U9                 | O2P  | 62.854       |
| ARG52              | NH2  | U10                | O2P  | 58.784       |
| SER65              | OG   | C2                 | O2P  | 52.505       |
| LYS62              | NZ   | G13                | O6   | 47.575       |
| SER136             | OG   | C7                 | O2P  | 45.715       |
| C7                 | N4   | GLU134             | O    | 43.316       |
| ARG52              | NH1  | U10                | O2P  | 42.966       |
| C7                 | O2'  | ALA116             | O    | 42.726       |
| G8                 | O2'  | ASN8               | OD1  | 28.927       |
| A5                 | N6   | GLU134             | OE1  | 24.328       |

|        |     |        |     |        |
|--------|-----|--------|-----|--------|
| U1     | O5' | ASP63  | O   | 17.968 |
| ARG137 | NH2 | A5     | O2P | 15.468 |
| TYR69  | OH  | U9     | O4  | 15.458 |
| ARG52  | NH2 | U9     | O2P | 14.889 |
| A5     | N6  | GLU134 | OE2 | 13.379 |
| A5     | N6  | GLU134 | O   | 12.609 |
| ARG137 | NH1 | A5     | O2P | 12.079 |
| ARG109 | NH2 | G8     | O2' | 11.109 |
| ARG137 | NH2 | A4     | O2P | 10.899 |
| ARG137 | NH2 | A6     | O1P | 10.629 |
| GLY1   | N   | U10    | O1P | 10.449 |
| ARG52  | NH2 | U10    | O5' | 10.449 |
| U1     | O5' | LYS62  | O   | 10.239 |

**Table S13.** Protein-RNA hydrogen bonds with percentage of persistence higher than 10% for run 13 of the N-NTD:dsTRS complex.

| Donor              |      | Acceptor           |      | %Persistence |
|--------------------|------|--------------------|------|--------------|
| Amino acid residue | Atom | Nucleotide residue | Atom |              |
| ARG52              | NH2  | U10                | O2P  | 65.473       |
| ARG52              | NH1  | U10                | O2P  | 56.324       |
| ARG48              | NH2  | U9                 | O1P  | 49.485       |
| THR9               | OG1  | G8                 | N2   | 46.625       |
| LYS62              | NZ   | U11                | O4   | 45.025       |
| SER65              | OG   | C2                 | O2P  | 42.236       |
| ARG52              | NH1  | U9                 | O1P  | 41.726       |
| LYS62              | NZ   | U10                | O4   | 35.426       |
| THR9               | OG1  | G8                 | N3   | 35.096       |
| LYS60              | NZ   | A12                | O2P  | 34.437       |
| ASN110             | ND2  | C7                 | O3'  | 30.657       |
| C2                 | N4   | LYS62              | O    | 30.057       |
| G8                 | N2   | ASN8               | O    | 29.557       |
| ARG67              | NH2  | C2                 | O2P  | 27.337       |
| TYR71              | OH   | G8                 | O5'  | 25.507       |
| LYS60              | NZ   | G13                | O2P  | 24.828       |
| U1                 | O5'  | ASP63              | OD1  | 23.708       |
| THR9               | OG1  | G8                 | O2'  | 21.988       |
| ARG137             | NH2  | A4                 | O2P  | 20.918       |
| ARG52              | NH2  | U10                | O1P  | 18.808       |
| ARG67              | NH2  | C2                 | O1P  | 16.548       |
| C7                 | O2'  | ASN110             | OD1  | 15.298       |
| SER140             | OG   | A4                 | O2P  | 14.269       |
| ARG52              | NH1  | U9                 | O2P  | 14.109       |
| ARG48              | NH1  | U9                 | O1P  | 12.929       |
| C7                 | O2'  | ASN8               | OD1  | 12.719       |
| ARG52              | NE   | U10                | O2P  | 12.429       |
| ARG52              | NH2  | U9                 | O2P  | 12.109       |
| ARG52              | NE   | U9                 | O2P  | 11.909       |
| ARG137             | NH2  | U3                 | O2P  | 11.179       |

|        |     |    |     |        |
|--------|-----|----|-----|--------|
| ARG137 | NH1 | U3 | O2P | 10.049 |
|--------|-----|----|-----|--------|

**Table S14.** Protein-RNA hydrogen bonds with percentage of persistence higher than 10% for run 14 of the N-NTD:dsTRS complex.

| Donor              |      | Acceptor           |      | %Persistence |
|--------------------|------|--------------------|------|--------------|
| Amino acid residue | Atom | Nucleotide residue | Atom |              |
| ASN8               | ND2  | U9                 | O1P  | 88.451       |
| SER11              | N    | G8                 | O4'  | 79.162       |
| ARG67              | NH2  | C2                 | O2P  | 77.662       |
| G8                 | N2   | PRO111             | O    | 75.962       |
| G8                 | O2'  | ASN8               | OD1  | 73.253       |
| ARG137             | NH2  | A4                 | O2P  | 60.934       |
| ARG52              | NH1  | U9                 | O1P  | 52.525       |
| ARG52              | NH2  | U10                | O1P  | 45.295       |
| LYS60              | NZ   | A12                | O2P  | 44.456       |
| ARG52              | NE   | U10                | O2P  | 43.366       |
| ARG137             | NH2  | U3                 | O1P  | 33.547       |
| ARG137             | NH2  | A5                 | O2P  | 33.437       |
| LYS62              | NZ   | G13                | O6   | 30.797       |
| ARG137             | NH1  | U3                 | O1P  | 25.287       |
| ARG67              | NH1  | C2                 | O2P  | 24.208       |
| ARG137             | NH1  | A4                 | O1P  | 23.128       |
| ARG137             | NH1  | A4                 | O2P  | 17.528       |
| LYS60              | NZ   | U11                | O1P  | 16.218       |
| ARG137             | NH2  | A4                 | O1P  | 15.778       |
| C7                 | O2'  | ALA112             | O    | 14.879       |
| LYS62              | NZ   | U11                | O4   | 14.739       |
| LYS62              | NZ   | U10                | O4   | 14.309       |
| ARG52              | NH2  | U11                | O2P  | 12.049       |
| ARG137             | NE   | A5                 | O2P  | 11.019       |
| ARG53              | N    | U9                 | O1P  | 10.179       |
| ARG137             | NE   | A4                 | O1P  | 10.179       |

**Table S15.** Protein-RNA hydrogen bonds with percentage of persistence higher than 10% for run 15 of the N-NTD:dsTRS complex.

| Donor              |      | Acceptor           |      | %Persistence |
|--------------------|------|--------------------|------|--------------|
| Amino acid residue | Atom | Nucleotide residue | Atom |              |
| ARG52              | NH2  | U10                | O1P  | 90.731       |
| SER11              | N    | G8                 | O4'  | 87.771       |
| ARG52              | NE   | U10                | O2P  | 81.122       |
| ASN8               | ND2  | G8                 | O5'  | 70.823       |
| SER65              | OG   | C2                 | O2P  | 63.744       |
| ARG52              | NH1  | U9                 | O1P  | 56.774       |
| ASP58              | N    | U11                | O1P  | 51.925       |
| ARG137             | NH2  | A6                 | O1P  | 47.055       |

|        |     |        |     |        |
|--------|-----|--------|-----|--------|
| LYS62  | NZ  | U11    | O2P | 46.425 |
| A6     | N6  | GLU134 | OE1 | 46.375 |
| ASN7   | N   | U9     | O1P | 45.345 |
| ALA15  | N   | G8     | O6  | 44.186 |
| A6     | N6  | GLU134 | OE2 | 40.856 |
| LYS60  | NZ  | A12    | O2P | 36.106 |
| GLY4   | N   | U9     | O2' | 35.266 |
| ARG137 | NH2 | C7     | O2P | 31.617 |
| A5     | N6  | GLU134 | OE2 | 31.057 |
| ARG137 | NE  | A6     | O2P | 30.077 |
| A5     | N6  | GLU134 | OE1 | 29.237 |
| ASN8   | N   | U9     | O1P | 23.178 |
| GLY138 | N   | A5     | O2P | 22.298 |
| ARG137 | NE  | A6     | O1P | 21.658 |
| GLY57  | N   | U10    | O3' | 21.088 |
| U1     | O5' | ASP63  | O   | 17.488 |
| GLY57  | N   | U10    | O1P | 15.608 |
| ARG137 | NH1 | C7     | O2P | 15.258 |
| GLY57  | N   | U11    | O1P | 15.168 |
| GLY20  | N   | U3     | O1P | 14.579 |
| ARG137 | NH2 | A6     | O2P | 13.939 |
| ARG109 | NH2 | G8     | N3  | 12.389 |
| ASN8   | ND2 | U9     | O1P | 11.059 |
| GLY138 | N   | A5     | O1P | 11.039 |

**Table S16.** Protein-RNA hydrogen bonds with percentage of persistence higher than 10% for run 16 of the N-NTD:dsTRS complex.

| Donor              |      | Acceptor           |      | %Persistence |
|--------------------|------|--------------------|------|--------------|
| Amino acid residue | Atom | Nucleotide residue | Atom |              |
| ARG52              | NH2  | U10                | O1P  | 90.731       |
| SER11              | N    | G8                 | O4'  | 87.771       |
| ARG52              | NE   | U10                | O2P  | 81.122       |
| ASN8               | ND2  | G8                 | O5'  | 70.823       |
| SER65              | OG   | C2                 | O2P  | 63.744       |
| ARG52              | NH1  | U9                 | O1P  | 56.774       |
| ASP58              | N    | U11                | O1P  | 51.925       |
| ARG137             | NH2  | A6                 | O1P  | 47.055       |
| LYS62              | NZ   | U11                | O2P  | 46.425       |
| A6                 | N6   | GLU134             | OE1  | 46.375       |
| ASN7               | N    | U9                 | O1P  | 45.345       |
| ALA15              | N    | G8                 | O6   | 44.186       |
| A6                 | N6   | GLU134             | OE2  | 40.856       |
| LYS60              | NZ   | A12                | O2P  | 36.106       |
| GLY4               | N    | U9                 | O2'  | 35.266       |
| ARG137             | NH2  | C7                 | O2P  | 31.617       |
| A5                 | N6   | GLU134             | OE2  | 31.057       |
| ARG137             | NE   | A6                 | O2P  | 30.077       |
| A5                 | N6   | GLU134             | OE1  | 29.237       |

|        |     |       |     |        |
|--------|-----|-------|-----|--------|
| ASN8   | N   | U9    | O1P | 23.178 |
| GLY138 | N   | A5    | O2P | 22.298 |
| ARG137 | NE  | A6    | O1P | 21.658 |
| GLY57  | N   | U10   | O3' | 21.088 |
| U1     | O5' | ASP63 | O   | 17.488 |
| GLY57  | N   | U10   | O1P | 15.608 |
| ARG137 | NH1 | C7    | O2P | 15.258 |
| GLY57  | N   | U11   | O1P | 15.168 |
| GLY20  | N   | U3    | O1P | 14.579 |
| ARG137 | NH2 | A6    | O2P | 13.939 |
| ARG109 | NH2 | G8    | N3  | 12.389 |
| ASN8   | ND2 | U9    | O1P | 11.059 |
| GLY138 | N   | A5    | O1P | 11.039 |

**Table S17.** Protein-RNA hydrogen bonds with percentage of persistence higher than 10% for run 17 of the N-NTD:dsTRS complex.

| Donor              |      | Acceptor           |      | %Persistence |
|--------------------|------|--------------------|------|--------------|
| Amino acid residue | Atom | Nucleotide residue | Atom |              |
| TYR69              | OH   | U9                 | O2P  | 85.441       |
| ALA15              | N    | G8                 | O6   | 82.052       |
| ARG52              | NH1  | U11                | O2P  | 71.533       |
| ARG137             | NE   | U3                 | O2P  | 67.643       |
| ARG67              | NH1  | U9                 | O4   | 62.614       |
| ARG52              | NH2  | U11                | O2P  | 60.224       |
| A6                 | N6   | SER140             | OC1  | 42.976       |
| ARG52              | NH1  | U10                | O2P  | 41.026       |
| A6                 | N6   | GLU134             | OE2  | 36.776       |
| A6                 | N6   | GLU134             | OE1  | 36.396       |
| ARG52              | NH1  | U10                | O1P  | 31.967       |
| C7                 | N4   | SER140             | OC2  | 30.957       |
| ARG137             | NH1  | A4                 | O2P  | 27.637       |
| ARG55              | NH1  | U11                | O1P  | 25.507       |
| ARG137             | NH2  | U3                 | O2P  | 24.318       |
| ARG55              | NH2  | A12                | O1P  | 21.748       |
| THR51              | OG1  | U9                 | O1P  | 20.888       |
| C7                 | N4   | SER140             | OC1  | 18.278       |
| THR51              | N    | U9                 | O2P  | 17.678       |
| A6                 | N6   | SER140             | OC2  | 17.328       |
| ARG52              | NH2  | U10                | O1P  | 16.808       |
| ARG55              | NH1  | A12                | O2P  | 16.218       |
| ARG55              | NH2  | A12                | O2P  | 15.908       |
| LYS60              | NZ   | G13                | N7   | 13.709       |
| SER11              | N    | G8                 | O4'  | 12.919       |
| MET61              | N    | G13                | O2P  | 12.719       |
| ARG55              | NH2  | U11                | O1P  | 12.459       |
| ARG52              | NE   | U10                | O2P  | 12.159       |
| TYR71              | OH   | G8                 | O5'  | 11.879       |
| LYS60              | NZ   | G13                | O2P  | 11.549       |

|        |     |     |    |        |
|--------|-----|-----|----|--------|
| LYS60  | NZ  | G13 | O6 | 10.849 |
| ARG109 | NH1 | C7  | O2 | 10.399 |

**Table S18.** Protein-RNA hydrogen bonds with percentage of persistence higher than 10% for run 18 of the N-NTD:dsTRS complex.

| Donor              |      | Acceptor           |      | %Persistence |
|--------------------|------|--------------------|------|--------------|
| Amino acid residue | Atom | Nucleotide residue | Atom |              |
| SER65              | OG   | C2                 | O2P  | 92.471       |
| SER65              | OG   | U1                 | O5'  | 86.661       |
| GLY20              | N    | C2                 | O1P  | 78.272       |
| LYS62              | NZ   | G13                | O6   | 72.413       |
| A6                 | N6   | GLU134             | OE1  | 67.753       |
| SER11              | N    | G8                 | O4'  | 61.564       |
| ARG67              | NH2  | U10                | O4   | 55.734       |
| ARG52              | NH2  | U11                | O2P  | 50.715       |
| A5                 | N6   | GLU134             | OE2  | 45.525       |
| ARG52              | NH2  | U10                | O2P  | 44.046       |
| ARG52              | NE   | U10                | O2P  | 41.696       |
| ASN8               | ND2  | U9                 | O1P  | 41.566       |
| ARG67              | NH1  | U9                 | O4   | 35.296       |
| SER136             | OG   | C7                 | O2P  | 33.277       |
| ARG137             | NE   | A6                 | O1P  | 32.447       |
| ARG137             | N    | A6                 | O2P  | 30.087       |
| SER11              | N    | G8                 | O5'  | 29.657       |
| TYR69              | OH   | U9                 | O2P  | 28.207       |
| ARG67              | NH1  | U10                | O4   | 25.857       |
| C7                 | N4   | GLY135             | O    | 24.758       |
| TYR71              | OH   | G8                 | O5'  | 22.798       |
| ARG52              | NH2  | U9                 | O1P  | 21.968       |
| C7                 | N4   | GLU134             | OE1  | 21.908       |
| ARG137             | NH2  | A6                 | O1P  | 21.708       |
| TYR132             | OH   | A5                 | O2P  | 20.948       |
| ARG137             | NH2  | A5                 | O1P  | 20.238       |
| ARG137             | NE   | A6                 | O2P  | 19.918       |
| LYS21              | NZ   | U1                 | O5'  | 19.888       |
| HIS19              | NE2  | U3                 | O1P  | 19.878       |
| HIS19              | NE2  | U3                 | O2P  | 17.838       |
| ARG137             | NH2  | A6                 | O2P  | 17.218       |
| ARG52              | NH1  | U10                | O2P  | 15.668       |
| ARG137             | NH2  | A5                 | O2P  | 15.108       |
| ARG52              | NH2  | U10                | O1P  | 14.939       |
| C7                 | O2'  | SER140             | OC1  | 14.319       |
| ARG55              | NH1  | U11                | O1P  | 13.819       |
| A6                 | N6   | GLU134             | OE2  | 13.519       |
| ARG52              | NH1  | U9                 | O2P  | 13.379       |
| ARG52              | NH2  | U10                | O5'  | 13.139       |
| LYS62              | NZ   | G13                | N7   | 12.699       |
| ARG52              | NH1  | U9                 | O1P  | 11.539       |



|       |     |        |     |        |
|-------|-----|--------|-----|--------|
| ARG55 | NH2 | A12    | O1P | 11.409 |
| ARG55 | NH2 | U11    | O1P | 11.279 |
| C7    | O3' | SER140 | OC1 | 10.769 |
| GLY20 | N   | C2     | O2P | 10.349 |
| ARG55 | NE  | A12    | O1P | 10.059 |

**Table S19.** Protein-RNA hydrogen bonds with percentage of persistence higher than 10% for run 19 of the N-NTD:dsTRS complex.

| Donor              |      | Acceptor           |      | %Persistence |
|--------------------|------|--------------------|------|--------------|
| Amino acid residue | Atom | Nucleotide residue | Atom |              |
| TYR69              | OH   | U9                 | O2P  | 59.374       |
| ARG137             | NH2  | A6                 | O2P  | 56.354       |
| TYR71              | OH   | G8                 | O5'  | 56.334       |
| SER11              | N    | G8                 | O4'  | 53.535       |
| A6                 | N6   | GLU134             | OE1  | 43.586       |
| LYS62              | NZ   | G13                | O6   | 43.226       |
| ARG137             | NE   | A6                 | O2P  | 42.416       |
| ARG52              | NH2  | U11                | O2P  | 41.616       |
| SER11              | N    | G8                 | O5'  | 40.796       |
| ARG52              | NH2  | U10                | O1P  | 40.716       |
| ARG52              | NE   | U10                | O2P  | 40.426       |
| HIS19              | NE2  | U3                 | O1P  | 36.456       |
| A5                 | N6   | GLU134             | OE2  | 36.376       |
| HIS19              | NE2  | U3                 | O2P  | 29.877       |
| GLY20              | N    | C2                 | O1P  | 27.647       |
| TYR132             | OH   | U3                 | O2P  | 27.377       |
| GLY20              | N    | C2                 | O2P  | 26.717       |
| A5                 | N6   | GLU134             | OE1  | 25.167       |
| ARG53              | NE   | U9                 | O1P  | 25.097       |
| ARG67              | NH1  | U10                | O4   | 24.988       |
| ARG67              | NH2  | U10                | O4   | 24.598       |
| ARG52              | NH1  | U11                | O2P  | 23.338       |
| ARG53              | NH2  | G8                 | O3'  | 22.058       |
| LYS62              | NZ   | G13                | N7   | 16.408       |
| A6                 | N6   | GLU134             | OE2  | 15.398       |
| ARG137             | NH1  | A5                 | O2P  | 15.048       |
| LYS60              | NZ   | A12                | O2P  | 14.909       |
| TYR132             | OH   | C2                 | O2P  | 14.329       |
| SER65              | OG   | C2                 | O2P  | 13.099       |
| LYS60              | NZ   | A12                | O1P  | 12.779       |
| ARG137             | NH2  | A4                 | O2P  | 12.659       |
| ARG52              | NE   | U10                | O1P  | 11.229       |
| SER65              | OG   | U1                 | O5'  | 11.089       |
| ARG52              | NH1  | U10                | O1P  | 11.069       |
| LYS60              | NZ   | G13                | O2P  | 10.569       |

**Table S20.** Protein-RNA hydrogen bonds with percentage of persistence higher than 10% for run 20 of the N-NTD:dsTRS complex.

| <b>Donor</b>              |             | <b>Acceptor</b>           |             | <b>%Persistence</b> |
|---------------------------|-------------|---------------------------|-------------|---------------------|
| <b>Amino acid residue</b> | <b>Atom</b> | <b>Nucleotide residue</b> | <b>Atom</b> |                     |
| G8                        | N2          | PRO111                    | O           | 98.31               |
| ARG137                    | NH1         | A4                        | O2P         | 94.911              |
| SER11                     | N           | G8                        | O4'         | 84.882              |
| ARG137                    | NH2         | U3                        | O1P         | 78.582              |
| ARG55                     | NH1         | U11                       | O2P         | 66.813              |
| ARG55                     | NH2         | U10                       | O1P         | 65.853              |
| ARG53                     | NH1         | U10                       | O2P         | 60.174              |
| C7                        | O2'         | ALA112                    | O           | 54.205              |
| ARG109                    | NH1         | G8                        | N3          | 53.995              |
| ARG109                    | NH2         | G8                        | N2          | 53.295              |
| ARG137                    | NH1         | U3                        | O1P         | 52.145              |
| ARG55                     | NH1         | U10                       | O1P         | 50.505              |
| ARG137                    | NH1         | U3                        | O5'         | 49.945              |
| ARG53                     | NH1         | U9                        | O1P         | 39.996              |
| ARG55                     | NH1         | U10                       | O5'         | 37.486              |
| ARG53                     | NH2         | U9                        | O1P         | 33.637              |
| GLY4                      | N           | U9                        | O2'         | 31.537              |
| ARG52                     | NH1         | C2                        | O2P         | 31.067              |
| LYS60                     | NZ          | G13                       | N7          | 30.737              |
| LYS60                     | NZ          | A12                       | N7          | 27.197              |
| SER65                     | N           | U1                        | O5'         | 24.268              |
| GLY4                      | N           | U9                        | O3'         | 23.618              |
| ARG67                     | NH2         | C2                        | O1P         | 23.098              |
| ARG53                     | NH1         | U9                        | O2P         | 20.328              |
| ARG55                     | NH2         | U11                       | O2P         | 15.928              |
| ARG52                     | NH2         | C2                        | O2P         | 15.418              |
| SER65                     | N           | C2                        | O2P         | 15.338              |
| ARG109                    | NH2         | G8                        | N3          | 15.168              |
| ARG53                     | NH1         | U9                        | O5'         | 14.229              |
| ARG55                     | NH1         | U10                       | O2P         | 12.899              |
| ARG137                    | NH1         | U3                        | O2P         | 11.879              |
| GLY1                      | N           | U10                       | O2'         | 10.909              |
| ARG55                     | NH2         | U10                       | O2P         | 10.119              |
| C7                        | O3'         | ASN113                    | O           | 10.009              |

**Table S21.** Protein-RNA hydrogen bonds with percentage of persistence higher than 10% for run 21 of the N-NTD:dsTRS complex.

| <b>Donor</b>              |             | <b>Acceptor</b>           |             | <b>%Persistence</b> |
|---------------------------|-------------|---------------------------|-------------|---------------------|
| <b>Amino acid residue</b> | <b>Atom</b> | <b>Nucleotide residue</b> | <b>Atom</b> |                     |
| ARG52                     | NH1         | U10                       | O2P         | 49.675              |

|        |     |        |     |        |
|--------|-----|--------|-----|--------|
| GLY138 | N   | C2     | O1P | 41.006 |
| TYR69  | OH  | U9     | O2P | 38.796 |
| ASN8   | ND2 | U9     | O1P | 36.816 |
| ARG52  | NH2 | U10    | O2P | 34.217 |
| ARG52  | NH2 | U9     | O1P | 33.167 |
| G8     | O2' | ASN8   | OD1 | 32.797 |
| ARG137 | NH1 | C2     | O1P | 31.787 |
| ARG55  | NH1 | U11    | O2P | 31.477 |
| GLY57  | N   | G13    | O2P | 30.967 |
| THR51  | OG1 | U9     | O1P | 29.627 |
| SER11  | N   | G8     | O5' | 27.787 |
| U1     | O5' | GLU134 | OE1 | 26.817 |
| TYR132 | OH  | C2     | O1P | 26.797 |
| ARG137 | NH2 | U3     | O2P | 26.057 |
| G8     | N2  | ASN7   | OD1 | 25.907 |
| THR51  | N   | U9     | O1P | 21.248 |
| ARG52  | NH1 | U10    | O1P | 19.548 |
| G8     | N2  | MET3   | O   | 17.318 |
| U1     | O2' | SER136 | O   | 17.008 |
| ARG55  | NH2 | A12    | O2P | 16.418 |
| ARG137 | NH2 | C2     | O1P | 15.888 |
| ASP58  | N   | A12    | O1P | 15.038 |
| LYS62  | NZ  | U1     | O4  | 14.049 |
| LEU5   | N   | C7     | O2  | 13.909 |
| TYR132 | OH  | C2     | O2P | 13.239 |
| TYR71  | OH  | G8     | O5' | 12.999 |
| G8     | O2' | ASN7   | O   | 12.699 |
| ARG52  | NH1 | U9     | O1P | 12.669 |
| LYS62  | NZ  | G13    | O6  | 11.849 |
| ARG137 | NH2 | U3     | O1P | 10.969 |
| U1     | O5' | SER65  | O   | 10.599 |
| ARG137 | NH1 | U3     | O1P | 10.179 |

**Table S22.** Protein-RNA hydrogen bonds with percentage of persistence higher than 10% for run 22 of the N-NTD:dsTRS complex.

| Donor              |      | Acceptor           |      | %Persistence |
|--------------------|------|--------------------|------|--------------|
| Amino acid residue | Atom | Nucleotide residue | Atom |              |
| LYS62              | NZ   | G13                | O6   | 50.245       |
| C7                 | O2'  | ALA116             | O    | 47.445       |
| SER65              | OG   | C2                 | O2P  | 44.936       |
| SER11              | N    | G8                 | O4'  | 42.196       |
| ALA116             | N    | C7                 | O2   | 40.356       |
| ARG52              | NH1  | U9                 | O1P  | 40.036       |
| G8                 | N2   | PRO111             | O    | 32.907       |
| ASN8               | ND2  | U9                 | O1P  | 32.897       |
| ARG67              | NH2  | C2                 | O1P  | 31.247       |
| LYS60              | NZ   | U10                | O2P  | 30.787       |
| ARG137             | NH2  | A4                 | O2P  | 28.767       |

|        |     |        |     |        |
|--------|-----|--------|-----|--------|
| G8     | O2' | ASN8   | OD1 | 26.877 |
| G8     | N2  | ASN114 | O   | 25.787 |
| G8     | N2  | ASN114 | OD1 | 25.467 |
| ARG67  | NH2 | C2     | O2P | 23.338 |
| ARG137 | NE  | A4     | O2P | 22.998 |
| ARG52  | NH2 | U9     | O1P | 20.988 |
| ARG52  | NH1 | U9     | O2P | 19.938 |
| ASN114 | ND2 | G8     | O2' | 18.718 |
| C7     | O2' | ALA112 | O   | 18.438 |
| ASN114 | N   | U9     | O2' | 17.608 |
| ARG137 | NH2 | U3     | O2P | 17.498 |
| ARG52  | NH2 | U10    | O1P | 17.478 |
| LYS60  | NZ  | U11    | O2P | 15.528 |
| LYS60  | NZ  | U10    | O1P | 15.468 |
| ALA116 | N   | G8     | N2  | 14.709 |
| ASN114 | ND2 | G8     | N3  | 14.419 |
| ARG52  | NE  | U10    | O2P | 14.129 |
| U1     | O5' | ASP63  | O   | 14.029 |
| TYR69  | OH  | G8     | N7  | 13.439 |
| G8     | O2' | PRO111 | O   | 12.699 |
| ARG137 | NH1 | A5     | O2P | 12.589 |
| SER65  | N   | C2     | O2P | 12.099 |
| ARG137 | NH2 | A4     | O1P | 11.649 |
| ARG52  | NH1 | U10    | O2P | 10.929 |
| ARG52  | NH2 | U10    | O2P | 10.619 |
| LYS60  | NZ  | U9     | O1P | 10.159 |

**Table S23.** Protein-RNA hydrogen bonds with percentage of persistence higher than 10% for run 23 of the N-NTD:dsTRS complex.

| Donor              |      | Acceptor           |      | %Persistence |
|--------------------|------|--------------------|------|--------------|
| Amino acid residue | Atom | Nucleotide residue | Atom |              |
| SER11              | N    | G8                 | O4'  | 54.355       |
| LYS62              | NZ   | G13                | O6   | 48.635       |
| ASN114             | ND2  | C7                 | O2P  | 33.217       |
| ARG52              | NH2  | C2                 | O2P  | 31.087       |
| ARG137             | NH1  | U3                 | O1P  | 29.857       |
| C7                 | O2'  | PRO111             | O    | 28.787       |
| SER65              | N    | U1                 | O5'  | 23.648       |
| ARG137             | NH2  | U3                 | O2P  | 21.728       |
| SER11              | N    | G8                 | O2'  | 21.238       |
| ARG137             | NH2  | U3                 | O1P  | 20.988       |
| ASN8               | ND2  | U9                 | O1P  | 18.028       |
| G8                 | O2'  | ASN8               | OD1  | 17.018       |
| LYS60              | NZ   | G13                | O2P  | 16.008       |
| C7                 | O3'  | ALA112             | O    | 14.299       |
| GLY57              | N    | A12                | O2P  | 13.759       |
| C7                 | O3'  | PRO111             | O    | 12.569       |
| TYR71              | OH   | G8                 | O5'  | 12.389       |

|       |   |     |     |        |
|-------|---|-----|-----|--------|
| GLY57 | N | U11 | O1P | 11.369 |
| GLY57 | N | U11 | O2P | 10.819 |

**Table S24.** Protein-RNA hydrogen bonds with percentage of persistence higher than 10% for run 24 of the N-NTD:dsTRS complex.

| Donor              |      | Acceptor           |      | %Persistence |
|--------------------|------|--------------------|------|--------------|
| Amino acid residue | Atom | Nucleotide residue | Atom |              |
| ARG52              | NH2  | U10                | O1P  | 91.581       |
| SER11              | N    | G8                 | O4'  | 90.611       |
| ARG52              | NE   | U10                | O2P  | 82.912       |
| ARG55              | NH1  | U11                | O2P  | 69.443       |
| ARG137             | NH1  | A5                 | O2P  | 69.293       |
| ARG137             | NH2  | A4                 | O1P  | 63.614       |
| SER65              | OG   | C2                 | O2P  | 57.664       |
| A6                 | N6   | GLU134             | OE1  | 54.195       |
| LYS62              | NZ   | G13                | O6   | 44.756       |
| LYS60              | NZ   | A12                | O2P  | 42.686       |
| ARG55              | NH2  | U11                | O2P  | 39.826       |
| ASN8               | ND2  | U9                 | O2P  | 39.646       |
| LYS60              | NZ   | U11                | O1P  | 39.366       |
| ARG137             | NH1  | A4                 | O5'  | 38.486       |
| A6                 | N6   | GLU134             | OE2  | 38.146       |
| ARG137             | NH1  | A4                 | O1P  | 36.986       |
| ARG55              | NH2  | U11                | O1P  | 27.577       |
| ARG67              | NH2  | U9                 | O4   | 25.517       |
| ARG52              | NH1  | U9                 | O1P  | 25.327       |
| ARG137             | NH2  | A5                 | O2P  | 22.408       |
| ASN8               | ND2  | U9                 | O1P  | 21.488       |
| C2                 | N4   | LYS62              | O    | 20.548       |
| LYS62              | NZ   | G13                | N7   | 18.388       |
| ARG55              | NH1  | U10                | O1P  | 18.348       |
| ARG137             | NH2  | A4                 | O2P  | 16.678       |
| U1                 | O5'  | ASP63              | O    | 16.028       |
| A14                | N6   | MET61              | O    | 15.338       |
| ARG137             | NE   | A5                 | O2P  | 14.089       |
| SER65              | N    | C2                 | O2P  | 13.929       |
| GLY139             | N    | A6                 | O1P  | 13.419       |
| ARG109             | NH2  | G8                 | N3   | 12.049       |
| C2                 | N4   | ASP63              | O    | 12.019       |
| ARG52              | NE   | U10                | O1P  | 11.889       |
| LYS62              | NZ   | A12                | N7   | 11.069       |
| ARG67              | NH2  | C2                 | O2P  | 10.939       |
| ARG137             | NH1  | A4                 | O2P  | 10.769       |
| TYR132             | OH   | U3                 | O2P  | 10.509       |

**Table S25.** Protein-RNA hydrogen bonds with percentage of persistence higher than 10% for run 25 of the N-NTD:dsTRS complex.

| Donor              |      | Acceptor           |      | %Persistence |
|--------------------|------|--------------------|------|--------------|
| Amino acid residue | Atom | Nucleotide residue | Atom |              |
| TYR132             | OH   | A4                 | O2P  | 67.043       |
| SER11              | N    | G8                 | O4'  | 41.796       |
| A5                 | N6   | GLU134             | OE1  | 39.956       |
| ARG67              | NH1  | U10                | O4   | 32.547       |
| TYR69              | OH   | U9                 | O2P  | 31.887       |
| A5                 | N6   | GLU134             | OE2  | 30.637       |
| A4                 | N6   | GLU134             | OE1  | 30.497       |
| ARG67              | NH2  | U11                | O4   | 29.777       |
| ARG137             | NH2  | A5                 | O2P  | 29.407       |
| ARG67              | NH2  | U10                | O4   | 27.757       |
| G8                 | N2   | MET3               | O    | 26.987       |
| ARG52              | NH2  | U10                | O1P  | 26.267       |
| ARG55              | NH2  | U10                | O1P  | 25.857       |
| ARG52              | NH1  | U10                | O2P  | 23.388       |
| LYS60              | NZ   | A14                | O2P  | 23.098       |
| A4                 | N6   | GLU134             | OE2  | 23.058       |
| ARG55              | NH1  | U10                | O1P  | 22.818       |
| TYR71              | OH   | G8                 | O5'  | 22.448       |
| ARG52              | NH2  | U9                 | O1P  | 22.358       |
| ARG52              | NE   | U9                 | O1P  | 21.988       |
| ARG52              | NH1  | U9                 | O1P  | 21.898       |
| ARG137             | NH1  | A5                 | O2P  | 21.748       |
| ARG137             | NH2  | A5                 | O1P  | 21.608       |
| LYS60              | NZ   | G13                | O2P  | 21.158       |
| ARG55              | NH2  | U11                | O2P  | 20.478       |
| ARG55              | NH1  | U11                | O2P  | 20.018       |
| G8                 | N2   | ALA2               | O    | 17.898       |
| ARG137             | NH1  | A4                 | O1P  | 17.678       |
| ARG52              | NH1  | U10                | O1P  | 17.248       |
| SER11              | N    | G8                 | N7   | 17.088       |
| A6                 | N6   | GLU134             | OE2  | 16.428       |
| ARG55              | NH2  | U11                | O1P  | 15.848       |
| LYS62              | NZ   | G13                | O6   | 15.848       |
| ARG55              | NE   | U11                | O1P  | 15.178       |
| LYS60              | NZ   | G13                | O1P  | 14.659       |
| ARG55              | NH1  | U10                | O2P  | 14.359       |
| THR51              | N    | U9                 | O1P  | 14.309       |
| THR51              | OG1  | U9                 | O1P  | 13.749       |
| ARG137             | NH2  | A4                 | O2P  | 13.599       |
| ARG55              | NE   | U11                | O2P  | 13.359       |
| ARG52              | NE   | U10                | O2P  | 13.199       |
| ARG67              | NH1  | U9                 | O4   | 13.139       |
| GLY20              | N    | U1                 | O4   | 12.489       |
| LYS60              | NZ   | A12                | O1P  | 12.019       |
| LYS62              | NZ   | A14                | N7   | 11.619       |

|        |     |     |     |        |
|--------|-----|-----|-----|--------|
| ARG137 | NH1 | U3  | O1P | 11.459 |
| ARG55  | NH2 | U10 | O2P | 11.429 |
| ARG137 | NE  | A5  | O1P | 11.269 |
| ASN8   | ND2 | G8  | N3  | 10.629 |
| ARG55  | NH1 | U10 | O5' | 10.579 |
| TYR132 | OH  | C2  | O2P | 10.129 |
| ARG52  | NH2 | U10 | O2P | 10.019 |

**Table S26.** Protein-RNA hydrogen bonds with percentage of persistence higher than 10% for run 1 of the N-NTD:dsNS complex.

| Donor              |      | Acceptor           |      | %Persistence |
|--------------------|------|--------------------|------|--------------|
| Amino acid residue | Atom | Nucleotide residue | Atom |              |
| SER11              | N    | G8                 | O4'  | 80.052       |
| ARG52              | NH1  | C10                | O2P  | 66.783       |
| ALA15              | N    | G8                 | O6   | 65.313       |
| C7                 | N4   | GLU134             | O    | 63.594       |
| ARG52              | NH1  | U9                 | O2P  | 58.534       |
| ARG52              | NH2  | C10                | O2P  | 53.675       |
| LYS62              | NZ   | G12                | O6   | 44.126       |
| C7                 | O2'  | ALA116             | O    | 39.106       |
| GLY57              | N    | G12                | O2P  | 35.286       |
| ARG137             | NH2  | A6                 | O1P  | 29.577       |
| ARG52              | NH2  | C10                | O1P  | 29.367       |
| ASN8               | ND2  | U9                 | O1P  | 28.597       |
| ARG137             | NE   | A6                 | O1P  | 27.877       |
| LYS62              | NZ   | G12                | N7   | 26.697       |
| C1                 | N4   | ASP63              | O    | 24.568       |
| ARG137             | N    | A6                 | O2P  | 24.008       |
| G8                 | O2'  | ASN8               | OD1  | 22.768       |
| C1                 | N4   | LYS62              | O    | 22.198       |
| GLY138             | N    | G5                 | O2P  | 20.618       |
| HIS19              | NE2  | C3                 | O2P  | 20.468       |
| ARG52              | NE   | C10                | O2P  | 20.368       |
| GLY138             | N    | G5                 | O1P  | 20.228       |
| ARG137             | NH2  | G5                 | O1P  | 20.098       |
| A2                 | N6   | ASP63              | O    | 19.428       |
| SER65              | OG   | A2                 | O2P  | 17.948       |
| GLY1               | N    | C10                | O1P  | 15.998       |
| ARG67              | NH2  | A2                 | O2P  | 14.829       |
| ARG137             | NH1  | A6                 | O2P  | 13.939       |
| ARG137             | NH2  | A6                 | O2P  | 13.249       |
| HIS19              | NE2  | A2                 | O1P  | 11.719       |

**Table S27.** Protein-RNA hydrogen bonds with percentage of persistence higher than 10% for run 2 of the N-NTD:dsNS complex.

| Donor              |      | Acceptor           |      | %Persistence |
|--------------------|------|--------------------|------|--------------|
| Amino acid residue | Atom | Nucleotide residue | Atom |              |
| ARG52              | NH2  | C10                | O1P  | 97.35        |
| SER65              | OG   | A2                 | O2P  | 92.141       |
| ARG52              | NE   | C10                | O2P  | 90.011       |
| THR17              | OG1  | A2                 | O1P  | 75.832       |
| ARG67              | NE   | A2                 | O2P  | 65.743       |
| C1                 | N4   | ASP63              | O    | 57.924       |
| ARG67              | NH2  | A2                 | O1P  | 57.474       |
| GLY57              | N    | A11                | O1P  | 53.715       |
| ARG67              | NH2  | C3                 | O2P  | 44.626       |
| ARG137             | NH1  | U4                 | O2P  | 42.476       |
| LYS62              | NZ   | A11                | O2P  | 40.876       |
| G8                 | N2   | ASN8               | OD1  | 34.557       |
| LYS62              | NZ   | G12                | O2P  | 33.557       |
| ARG137             | NH2  | C3                 | O2P  | 30.877       |
| ARG67              | NH2  | A2                 | O5'  | 28.617       |
| GLY4               | N    | U9                 | O2'  | 27.887       |
| ARG137             | NH2  | U4                 | O2P  | 26.877       |
| LYS60              | NZ   | U13                | O2P  | 20.118       |
| ARG67              | NE   | A2                 | O1P  | 19.818       |
| ARG137             | NH1  | G5                 | O2P  | 18.848       |
| ARG137             | NH1  | C3                 | O5'  | 17.648       |
| GLN18              | N    | A2                 | O1P  | 16.838       |
| LYS62              | NZ   | G12                | O6   | 15.048       |
| ARG52              | NE   | C10                | O1P  | 14.859       |
| LYS62              | NZ   | G12                | N7   | 14.419       |
| C7                 | O3'  | GLY139             | O    | 13.549       |
| C10                | O2'  | GLY1               | O    | 10.639       |
| LYS60              | NZ   | G12                | O1P  | 10.189       |

**Table S28.** Protein-RNA hydrogen bonds with percentage of persistence higher than 10% for run 3 of the N-NTD:dsNS complex.

| Donor              |      | Acceptor           |      | %Persistence |
|--------------------|------|--------------------|------|--------------|
| Amino acid residue | Atom | Nucleotide residue | Atom |              |
| C1                 | N4   | LYS62              | O    | 75.152       |
| C7                 | O2'  | ASN8               | OD1  | 52.695       |
| ALA112             | N    | C7                 | O2'  | 50.375       |
| LYS60              | NZ   | U13                | O2P  | 48.035       |
| LYS62              | NZ   | G12                | O6   | 44.036       |
| LYS62              | NZ   | G12                | N7   | 42.216       |
| ARG48              | NH1  | G8                 | O5'  | 41.666       |
| G8                 | N2   | ASN8               | O    | 37.676       |
| ARG52              | NH2  | C10                | O2P  | 35.856       |



|        |     |     |     |        |
|--------|-----|-----|-----|--------|
| ASN8   | ND2 | C7  | O3' | 32.877 |
| ARG55  | NH2 | C10 | O1P | 32.407 |
| ARG52  | NH2 | C10 | O1P | 31.027 |
| SER140 | OG  | U4  | O1P | 29.037 |
| ARG67  | NH2 | A2  | O2P | 28.627 |
| LYS60  | N   | G12 | O2P | 27.587 |
| ARG67  | NH1 | A2  | O2P | 26.297 |
| GLY59  | N   | A11 | O1P | 25.217 |
| SER140 | N   | U4  | O1P | 24.618 |
| ARG52  | NH1 | U9  | O1P | 23.948 |
| LYS60  | NZ  | G12 | O1P | 23.848 |
| GLY139 | N   | C3  | O1P | 23.708 |
| ARG52  | NH1 | C10 | O2P | 20.408 |
| HIS19  | NE2 | A2  | O1P | 20.158 |
| ARG48  | NH1 | U9  | O1P | 18.688 |
| ARG55  | NH1 | C10 | O1P | 17.008 |
| THR51  | OG1 | U9  | O1P | 15.308 |
| ARG52  | NH2 | U9  | O1P | 15.248 |
| ARG67  | NH2 | A2  | O1P | 14.889 |
| TYR132 | OH  | A2  | O2P | 13.599 |
| ASN8   | ND2 | C7  | O2' | 13.289 |
| TYR132 | OH  | A2  | O1P | 12.439 |
| ALA2   | N   | C7  | O1P | 12.159 |
| ARG52  | NE  | C10 | O2P | 11.749 |
| SER65  | OG  | A2  | O2P | 11.579 |
| GLY59  | N   | A11 | O2P | 10.569 |
| SER65  | OG  | C1  | O5' | 10.529 |
| GLY139 | N   | C3  | O2P | 10.169 |

**Table S29.** Protein-RNA hydrogen bonds with percentage of persistence higher than 10% for run 4 of the N-NTD:dsNS complex.

| Donor              |      | Acceptor           |      | %Persistence |
|--------------------|------|--------------------|------|--------------|
| Amino acid residue | Atom | Nucleotide residue | Atom |              |
| SER65              | OG   | A2                 | O2P  | 87.161       |
| ARG52              | NH2  | C10                | O1P  | 85.651       |
| SER11              | N    | G8                 | O4'  | 85.191       |
| C1                 | N4   | LYS62              | O    | 84.532       |
| ARG52              | NE   | C10                | O2P  | 77.712       |
| SER65              | OG   | C1                 | O5'  | 64.964       |
| ARG137             | NE   | G5                 | O2P  | 61.854       |
| ASN8               | N    | U9                 | O1P  | 61.204       |
| ARG137             | NH2  | G5                 | O2P  | 55.274       |
| GLY59              | N    | A11                | O1P  | 46.975       |
| LYS60              | N    | G12                | O2P  | 43.696       |
| LYS62              | NZ   | G12                | O6   | 39.706       |
| G8                 | O2'  | ASN8               | O    | 36.476       |
| ARG52              | NH1  | U9                 | O1P  | 34.137       |
| ASN8               | ND2  | G8                 | O5'  | 32.617       |

|        |     |        |     |        |
|--------|-----|--------|-----|--------|
| SER140 | OG  | G5     | O1P | 32.057 |
| SER140 | N   | G5     | O1P | 30.537 |
| ARG137 | NH1 | U4     | O2P | 26.187 |
| LYS62  | NZ  | G12    | N7  | 25.167 |
| G8     | N2  | PRO111 | O   | 23.588 |
| ASN8   | ND2 | U9     | O2P | 21.268 |
| ARG109 | NH2 | G8     | N3  | 19.318 |
| GLY139 | N   | U4     | O1P | 17.508 |
| TYR132 | OH  | C3     | O2P | 13.129 |
| C7     | O2' | ALA112 | O   | 12.299 |
| LYS60  | NZ  | U13    | O2P | 12.229 |
| LYS62  | NZ  | A11    | N7  | 12.219 |
| GLY138 | N   | U4     | O1P | 10.289 |

**Table S30.** Protein-RNA hydrogen bonds with percentage of persistence higher than 10% for run 5 of the N-NTD:dsNS complex.

| Donor              |      | Acceptor           |      | %Persistence |
|--------------------|------|--------------------|------|--------------|
| Amino acid residue | Atom | Nucleotide residue | Atom |              |
| SER65              | OG   | A2                 | O2P  | 90.501       |
| SER11              | N    | G8                 | O4'  | 85.341       |
| ARG52              | NH1  | C10                | O2P  | 83.422       |
| ARG52              | NH2  | C10                | O2P  | 80.322       |
| GLY20              | N    | A2                 | O1P  | 76.402       |
| C1                 | N4   | ASP63              | O    | 71.983       |
| ARG52              | NH1  | U9                 | O2P  | 55.694       |
| SER65              | OG   | C1                 | O5'  | 49.405       |
| ARG137             | NH2  | A6                 | O1P  | 42.396       |
| A6                 | N6   | GLU134             | OE1  | 37.476       |
| ARG137             | NH2  | C7                 | O2P  | 36.096       |
| A6                 | N6   | GLU134             | OE2  | 35.756       |
| ARG137             | NE   | A6                 | O2P  | 35.056       |
| ASN7               | ND2  | U9                 | O1P  | 25.607       |
| GLY138             | N    | G5                 | O2P  | 22.628       |
| ALA116             | N    | G8                 | N2   | 19.938       |
| ARG137             | NH2  | A6                 | O2P  | 17.718       |
| ARG137             | NE   | A6                 | O1P  | 17.378       |
| ASN7               | ND2  | G8                 | O3'  | 16.648       |
| ARG52              | NH2  | C10                | O5'  | 16.338       |
| ARG53              | NH2  | U9                 | O1P  | 16.178       |
| G8                 | N2   | ASN114             | O    | 15.098       |
| ARG137             | NH2  | A6                 | O5'  | 14.009       |
| LYS62              | NZ   | G14                | N7   | 13.939       |
| C7                 | O2'  | ALA116             | O    | 12.509       |
| ALA2               | N    | C10                | O1P  | 12.079       |
| G8                 | O2'  | PRO111             | O    | 11.719       |
| ALA116             | N    | C7                 | O2   | 11.639       |
| GLY1               | N    | A11                | O2P  | 11.489       |
| ASN7               | N    | U9                 | O1P  | 11.129       |

|        |     |       |     |        |
|--------|-----|-------|-----|--------|
| GLY1   | N   | A11   | O1P | 11.049 |
| G8     | O5' | SER11 | OG  | 11.039 |
| C1     | N4  | LYS62 | O   | 11.009 |
| ARG137 | NH1 | G5    | O1P | 10.269 |

**Table S31.** Protein-RNA hydrogen bonds with percentage of persistence higher than 10% for run 6 of the N-NTD:dsNS complex.

| Donor              |      | Acceptor           |      | %Persistence |
|--------------------|------|--------------------|------|--------------|
| Amino acid residue | Atom | Nucleotide residue | Atom |              |
| C1                 | N4   | LYS62              | O    | 81.532       |
| ASN8               | ND2  | G8                 | N3   | 77.432       |
| GLY4               | N    | C7                 | O2'  | 74.993       |
| ARG67              | NH1  | A2                 | O2P  | 69.213       |
| ARG67              | NH2  | A2                 | O2P  | 53.765       |
| ARG52              | NH1  | C10                | O2P  | 50.635       |
| ARG52              | NH2  | C10                | O2P  | 46.675       |
| GLY57              | N    | G12                | O2P  | 37.316       |
| ARG67              | NH2  | A2                 | O1P  | 37.126       |
| ARG137             | NH2  | U4                 | O2P  | 33.547       |
| LYS62              | NZ   | G12                | O6   | 27.497       |
| ARG52              | NH2  | C10                | O1P  | 23.258       |
| ARG137             | NH1  | U4                 | O2P  | 22.898       |
| ARG52              | NE   | U9                 | O2P  | 20.518       |
| LYS62              | NZ   | G12                | N7   | 18.668       |
| ARG52              | NE   | C10                | O2P  | 17.618       |
| ARG137             | NH1  | C3                 | O2P  | 16.658       |
| ARG52              | NH2  | A11                | O2P  | 15.928       |
| ARG52              | NH1  | A11                | O2P  | 15.648       |
| ARG52              | NH2  | U9                 | O2P  | 14.789       |
| GLY1               | N    | C10                | O2'  | 12.559       |
| GLY57              | N    | A11                | O1P  | 12.439       |
| ARG137             | NH1  | C3                 | O1P  | 11.769       |
| ALA2               | N    | U9                 | O2'  | 11.669       |
| TYR132             | OH   | C3                 | O1P  | 11.439       |
| HIS19              | NE2  | A2                 | O1P  | 10.949       |
| THR17              | OG1  | A2                 | O1P  | 10.909       |
| ARG137             | NH2  | C3                 | O1P  | 10.169       |
| ARG55              | NH2  | A11                | O1P  | 10.059       |

**Table S32.** Protein-RNA hydrogen bonds with percentage of persistence higher than 10% for run 7 of the N-NTD:dsNS complex.

| Donor              |      | Acceptor           |      | %Persistence |
|--------------------|------|--------------------|------|--------------|
| Amino acid residue | Atom | Nucleotide residue | Atom |              |
| SER11              | N    | G8                 | O4'  | 94.851       |
| SER65              | OG   | A2                 | O2P  | 89.031       |

|        |     |        |     |        |
|--------|-----|--------|-----|--------|
| ALA15  | N   | G8     | O6  | 85.081 |
| C1     | N4  | ASP63  | O   | 65.333 |
| ARG52  | NE  | C10    | O2P | 58.954 |
| ARG52  | NH2 | C10    | O2P | 55.604 |
| SER136 | OG  | A6     | O1P | 54.115 |
| ARG52  | NH2 | A11    | O2P | 42.076 |
| GLY57  | N   | A11    | O1P | 38.496 |
| GLY20  | N   | A2     | O2P | 36.296 |
| A6     | N6  | GLU134 | OE2 | 33.337 |
| LYS21  | N   | A2     | O1P | 32.847 |
| SER136 | N   | C7     | O2P | 31.717 |
| A6     | N6  | GLU134 | OE1 | 26.887 |
| SER65  | OG  | C1     | O5' | 26.517 |
| HIS19  | NE2 | C3     | O1P | 26.407 |
| LYS60  | NZ  | U13    | O2P | 23.858 |
| C1     | N4  | LYS62  | O   | 22.278 |
| C7     | O2' | ALA116 | O   | 22.188 |
| LYS60  | NZ  | G12    | O1P | 21.778 |
| LYS62  | NZ  | G12    | N7  | 18.798 |
| LYS21  | NZ  | A2     | O1P | 18.258 |
| ARG137 | N   | A6     | O1P | 15.528 |
| TYR69  | OH  | U9     | O4  | 15.248 |
| ASN8   | ND2 | U9     | O1P | 15.058 |
| LYS62  | NZ  | G14    | N7  | 15.018 |
| ARG67  | NH1 | A2     | O2P | 13.569 |
| HIS19  | NE2 | C3     | O2P | 13.299 |
| LYS62  | NZ  | G12    | O6  | 12.959 |
| ARG109 | NH2 | G8     | O2' | 12.859 |
| GLY20  | N   | A2     | O1P | 12.519 |
| ARG137 | NH2 | G5     | O2P | 11.169 |
| LYS62  | NZ  | G12    | O2P | 11.059 |
| ARG137 | NH2 | U4     | O2P | 10.319 |
| TYR132 | OH  | C3     | O2P | 10.009 |

**Table S33.** Protein-RNA hydrogen bonds with percentage of persistence higher than 10% for run 8 of the N-NTD:dsNS complex.

| Donor              |      | Acceptor           |      | %Persistence |
|--------------------|------|--------------------|------|--------------|
| Amino acid residue | Atom | Nucleotide residue | Atom |              |
| C1                 | N4   | LYS62              | O    | 94.421       |
| ARG67              | NH2  | A2                 | O2P  | 84.162       |
| ARG52              | NH2  | C10                | O2P  | 64.974       |
| LYS62              | NZ   | G12                | O6   | 49.995       |
| ARG52              | NH1  | U9                 | O2P  | 47.625       |
| ARG52              | NH2  | U9                 | O2P  | 39.396       |
| LYS62              | NZ   | G12                | N7   | 39.256       |
| LYS60              | NZ   | U13                | O2P  | 35.936       |
| ARG137             | NH2  | G5                 | O6   | 32.387       |
| GLY138             | N    | C3                 | O1P  | 32.077       |

|        |     |      |     |        |
|--------|-----|------|-----|--------|
| TYR132 | OH  | A2   | O1P | 30.667 |
| GLY57  | N   | A11  | O1P | 29.957 |
| ARG137 | NE  | U4   | O2P | 29.657 |
| ARG52  | NE  | C10  | O2P | 28.397 |
| ARG52  | NH2 | U9   | O5' | 28.317 |
| ARG137 | NH1 | G5   | N7  | 28.047 |
| LYS60  | NZ  | G12  | O1P | 25.647 |
| TYR71  | OH  | G8   | O5' | 23.838 |
| ASN8   | ND2 | C7   | O2' | 23.358 |
| ARG137 | NH1 | C3   | O2P | 22.248 |
| SER65  | OG  | C1   | O5' | 21.838 |
| ARG137 | NH2 | U4   | O2P | 21.828 |
| ARG137 | NH2 | G5   | O2P | 20.568 |
| ARG137 | NH2 | A2   | O1P | 19.948 |
| G8     | N2  | ASN7 | O   | 18.928 |
| LYS60  | NZ  | G12  | O2P | 18.888 |
| ARG137 | NH1 | A2   | O5' | 16.138 |
| ARG52  | NH2 | U9   | O1P | 15.088 |
| LYS62  | NZ  | U13  | O4  | 14.099 |
| ARG52  | NH2 | C10  | O1P | 13.889 |
| ARG137 | NH2 | U4   | O5' | 11.729 |

**Table S34.** Protein-RNA hydrogen bonds with percentage of persistence higher than 10% for run 9 of the N-NTD:dsNS complex.

| Donor              |      | Acceptor           |      | %Persistence |
|--------------------|------|--------------------|------|--------------|
| Amino acid residue | Atom | Nucleotide residue | Atom |              |
| C1                 | N4   | LYS62              | O    | 77.592       |
| G8                 | N2   | ASN8               | O    | 67.913       |
| TYR132             | OH   | A2                 | O1P  | 65.993       |
| GLY57              | N    | G12                | O2P  | 53.935       |
| ARG52              | NH2  | C10                | O2P  | 53.765       |
| LYS62              | NZ   | G12                | O6   | 49.075       |
| ARG52              | NH1  | U9                 | O1P  | 43.576       |
| ARG52              | NH2  | U9                 | O5'  | 40.466       |
| SER65              | N    | C1                 | O5'  | 38.166       |
| ARG67              | NH2  | A2                 | O2P  | 37.606       |
| G8                 | O2'  | ASN8               | OD1  | 32.927       |
| SER65              | OG   | A2                 | O2P  | 32.407       |
| ARG67              | NH1  | A2                 | O2P  | 31.167       |
| LYS62              | NZ   | G12                | N7   | 30.567       |
| ARG48              | NH2  | U9                 | O1P  | 30.207       |
| ARG137             | NH2  | C3                 | O1P  | 28.887       |
| ARG52              | NE   | C10                | O1P  | 24.328       |
| LYS60              | NZ   | U13                | O2P  | 22.848       |
| ARG137             | NH1  | C3                 | O1P  | 22.838       |
| ARG52              | NH2  | C10                | O1P  | 20.548       |
| THR51              | N    | U9                 | O2P  | 19.478       |
| SER65              | OG   | C1                 | O5'  | 16.548       |

|        |     |     |     |        |
|--------|-----|-----|-----|--------|
| ARG137 | NH2 | C3  | O2P | 15.628 |
| ARG137 | NH2 | A2  | O1P | 12.159 |
| ARG52  | NH2 | U9  | O1P | 11.999 |
| ARG52  | N   | U9  | O1P | 11.639 |
| ARG137 | NH1 | A2  | O1P | 11.369 |
| ARG137 | NH1 | C3  | O2P | 11.009 |
| LYS60  | NZ  | G12 | O1P | 10.539 |

**Table S35.** Protein-RNA hydrogen bonds with percentage of persistence higher than 10% for run 10 of the N-NTD:dsNS complex.

| Donor              |      | Acceptor           |      | %Persistence |
|--------------------|------|--------------------|------|--------------|
| Amino acid residue | Atom | Nucleotide residue | Atom |              |
| ARG52              | NE   | C10                | O2P  | 59.434       |
| C1                 | N4   | LYS62              | O    | 51.655       |
| ARG52              | NH2  | A11                | O2P  | 51.415       |
| LYS62              | NZ   | G12                | O6   | 44.436       |
| ARG137             | NH2  | A6                 | O2P  | 40.586       |
| ARG137             | NH1  | G5                 | O2P  | 34.097       |
| ARG67              | NH2  | A2                 | O2P  | 32.607       |
| ARG137             | NE   | A6                 | O2P  | 32.007       |
| ALA15              | N    | G8                 | O6   | 30.957       |
| LYS62              | NZ   | G12                | N7   | 30.847       |
| ARG52              | NH2  | C10                | O1P  | 30.037       |
| C7                 | N4   | GLU134             | O    | 29.597       |
| TYR69              | OH   | U9                 | O2P  | 28.787       |
| TYR71              | OH   | G8                 | O5'  | 28.197       |
| SER11              | N    | G8                 | O4'  | 27.007       |
| ARG52              | NH2  | C10                | O2P  | 25.327       |
| LYS60              | NZ   | G12                | O2P  | 24.708       |
| C1                 | N4   | MET61              | O    | 23.698       |
| ARG67              | NH1  | A2                 | O2P  | 22.938       |
| C7                 | O2'  | PRO111             | O    | 21.648       |
| SER11              | N    | G8                 | O5'  | 21.168       |
| GLY57              | N    | A11                | O1P  | 20.968       |
| SER11              | N    | G8                 | O2'  | 20.908       |
| TYR69              | OH   | U9                 | O4   | 18.098       |
| ARG137             | NH2  | G5                 | O2P  | 17.918       |
| C7                 | O3'  | ALA112             | O    | 17.388       |
| SER65              | OG   | A2                 | O2P  | 17.278       |
| ARG137             | NE   | G5                 | O2P  | 17.138       |
| LYS62              | NZ   | U13                | O4   | 14.229       |
| HIS19              | NE2  | U4                 | O2P  | 13.739       |
| A2                 | N6   | LYS62              | O    | 13.639       |
| ASP58              | N    | A11                | O1P  | 13.509       |
| ARG109             | NH1  | G8                 | N2   | 12.599       |
| ARG52              | NH1  | A11                | O2P  | 11.409       |
| C1                 | O5'  | ASP63              | OD2  | 10.829       |
| ARG109             | NH2  | G8                 | N3   | 10.779       |

**Table S36.** Protein-RNA hydrogen bonds with percentage of persistence higher than 10% for run 11 of the N-NTD:dsNS complex.

| Donor              |      | Acceptor           |      | %Persistence |
|--------------------|------|--------------------|------|--------------|
| Amino acid residue | Atom | Nucleotide residue | Atom |              |
| SER11              | N    | G8                 | O4'  | 84.352       |
| ARG137             | NH1  | G5                 | O2P  | 59.954       |
| GLY57              | N    | G12                | O2P  | 57.064       |
| ARG137             | NH1  | U4                 | O2P  | 55.964       |
| SER65              | OG   | A2                 | O2P  | 55.254       |
| ARG52              | NH1  | C10                | O2P  | 53.945       |
| C1                 | N4   | LYS62              | O    | 51.805       |
| ARG52              | NH2  | C10                | O2P  | 47.335       |
| ARG52              | NH1  | U9                 | O1P  | 47.105       |
| LYS62              | NZ   | G12                | O6   | 45.005       |
| A6                 | N6   | GLU134             | OE2  | 44.966       |
| ARG137             | NH2  | U4                 | O2P  | 41.006       |
| ARG67              | NH2  | U9                 | O4   | 37.746       |
| C1                 | N4   | ASP63              | O    | 37.196       |
| GLY20              | N    | A2                 | O1P  | 33.237       |
| ARG52              | NH2  | C10                | O1P  | 30.407       |
| SER65              | OG   | C1                 | O5'  | 25.917       |
| ARG137             | NH1  | U4                 | O5'  | 24.278       |
| LYS62              | NZ   | G12                | N7   | 23.878       |
| ARG137             | NH2  | C3                 | O1P  | 22.468       |
| LYS60              | NZ   | U13                | O2P  | 19.898       |
| A6                 | N6   | GLU134             | OE1  | 19.738       |
| ARG137             | NH1  | C3                 | O1P  | 19.578       |
| ARG52              | NE   | U9                 | O1P  | 18.948       |
| ARG137             | NH1  | C3                 | O5'  | 18.388       |
| HIS19              | NE2  | A2                 | O1P  | 17.738       |
| ARG137             | NH2  | U4                 | O1P  | 17.058       |
| ARG52              | NH2  | U9                 | O1P  | 15.328       |
| LYS60              | NZ   | G12                | O1P  | 15.128       |
| C7                 | O3'  | ASN114             | OD1  | 11.779       |
| ARG52              | NH1  | U9                 | O2P  | 11.379       |
| SER11              | OG   | G8                 | O5'  | 11.029       |
| ARG137             | NH2  | C3                 | O2P  | 10.489       |
| SER65              | N    | C1                 | O5'  | 10.339       |

**Table S37.** Protein-RNA hydrogen bonds with percentage of persistence higher than 10% for run 12 of the N-NTD:dsNS complex.

| Donor              |      | Acceptor           |      | %Persistence |
|--------------------|------|--------------------|------|--------------|
| Amino acid residue | Atom | Nucleotide residue | Atom |              |
| SER11              | N    | G8                 | O4'  | 90.121       |

|        |     |       |     |        |
|--------|-----|-------|-----|--------|
| SER65  | OG  | A2    | O2P | 86.841 |
| ARG67  | NE  | A2    | O2P | 72.663 |
| C1     | N4  | ASP63 | O   | 69.323 |
| ARG67  | NH2 | C3    | O2P | 65.713 |
| ARG67  | NH2 | A2    | O5' | 62.534 |
| GLY138 | N   | G5    | O2P | 60.444 |
| ARG137 | NH2 | C7    | O2P | 60.184 |
| ARG137 | NH1 | A6    | O2P | 59.494 |
| ARG137 | NH1 | C7    | O2P | 53.185 |
| THR17  | OG1 | A2    | O1P | 50.225 |
| GLN18  | N   | A2    | O1P | 44.686 |
| ARG52  | NH2 | U9    | O1P | 43.566 |
| LYS60  | NZ  | G12   | O2P | 36.716 |
| LYS60  | NZ  | A11   | O1P | 35.616 |
| ARG52  | NH2 | C10   | O2P | 33.627 |
| LYS62  | NZ  | G12   | O6  | 33.317 |
| LYS62  | NZ  | G12   | N7  | 32.647 |
| GLY57  | N   | A11   | O1P | 28.327 |
| ARG52  | NH1 | U9    | O1P | 27.307 |
| ARG67  | NH2 | A2    | O2P | 25.587 |
| ARG52  | NH2 | C10   | O1P | 23.158 |
| C1     | N4  | LYS62 | O   | 20.938 |
| ARG52  | NE  | U9    | O1P | 20.088 |
| ARG52  | NH1 | C10   | O2P | 18.368 |
| GLY139 | N   | G5    | O1P | 16.468 |
| ALA116 | N   | G8    | N2  | 15.638 |
| ARG52  | NH1 | C10   | O1P | 15.428 |
| GLY139 | N   | U4    | O1P | 13.639 |
| SER65  | OG  | C1    | O5' | 13.279 |
| ARG52  | NE  | C10   | O2P | 12.309 |
| LYS60  | NZ  | U13   | O2P | 11.779 |
| ARG52  | NE  | U9    | O2P | 10.259 |
| ARG137 | NH2 | A6    | O2P | 10.029 |

**Table S38.** Protein-RNA hydrogen bonds with percentage of persistence higher than 10% for run 13 of the N-NTD:dsNS complex.

| Donor              |      | Acceptor           |      | %Persistence |
|--------------------|------|--------------------|------|--------------|
| Amino acid residue | Atom | Nucleotide residue | Atom |              |
| SER11              | N    | G8                 | O4'  | 94.141       |
| SER65              | OG   | A2                 | O2P  | 90.081       |
| C1                 | N4   | LYS62              | O    | 79.142       |
| ARG52              | NH2  | C10                | O2P  | 78.582       |
| ASN8               | ND2  | U9                 | O1P  | 77.602       |
| ARG55              | NH2  | U9                 | O1P  | 68.813       |
| ALA15              | N    | G8                 | O6   | 59.944       |
| ARG137             | NH2  | U4                 | O2P  | 45.035       |
| ARG52              | NH2  | A11                | O2P  | 42.596       |
| ASN8               | N    | U9                 | O1P  | 39.386       |



|        |     |        |     |        |
|--------|-----|--------|-----|--------|
| A6     | N6  | GLU134 | OE1 | 39.266 |
| ARG52  | NE  | C10    | O2P | 38.106 |
| ARG55  | NE  | C10    | O1P | 37.796 |
| SER65  | OG  | C1     | O5' | 35.796 |
| GLY138 | N   | G5     | O1P | 35.566 |
| G8     | O2' | ASN7   | OD1 | 34.527 |
| C7     | N4  | GLU134 | OE2 | 33.887 |
| ARG137 | NE  | G5     | O2P | 33.797 |
| ARG137 | NH2 | C3     | O1P | 32.777 |
| LYS62  | NZ  | G12    | O6  | 30.677 |
| ARG137 | N   | G5     | O1P | 30.557 |
| ARG67  | NH2 | U4     | O4  | 29.047 |
| ARG137 | NE  | U4     | O2P | 24.238 |
| LYS60  | NZ  | G12    | O1P | 23.598 |
| ARG52  | NE  | U9     | O2P | 23.488 |
| ARG137 | NH2 | G5     | O2P | 21.958 |
| LYS62  | NZ  | U13    | O4  | 20.248 |
| LYS62  | NZ  | G12    | N7  | 20.148 |
| ARG52  | NH2 | U9     | O5' | 17.938 |
| ARG52  | NH1 | A11    | O2P | 17.488 |
| ARG137 | NH1 | C3     | O1P | 16.348 |
| ASN8   | N   | G8     | O3' | 16.258 |
| LYS60  | NZ  | G12    | O2P | 15.518 |
| TYR132 | OH  | C3     | O2P | 15.328 |
| HIS19  | NE2 | C3     | O1P | 15.208 |
| ARG137 | NH1 | U4     | O2P | 14.689 |
| C1     | N4  | ASP63  | O   | 14.029 |
| SER136 | OG  | G5     | O1P | 13.599 |
| G8     | O5' | ASN8   | O   | 13.299 |
| LYS60  | NZ  | U13    | O2P | 13.269 |
| ARG52  | NH2 | C10    | O1P | 13.039 |
| LYS62  | NZ  | G12    | O2P | 13.009 |
| ARG137 | N   | G5     | O2P | 12.949 |
| ARG52  | NH2 | U9     | O2P | 12.559 |
| A6     | N6  | GLU134 | OE2 | 12.129 |
| SER136 | OG  | G5     | O2P | 10.989 |
| GLY20  | N   | A2     | O1P | 10.769 |
| ARG55  | NH1 | U9     | O1P | 10.259 |

**Table S39.** Protein-RNA hydrogen bonds with percentage of persistence higher than 10% for run 14 of the N-NTD:dsNS complex.

| Donor              |      | Acceptor           |      | %Persistence |
|--------------------|------|--------------------|------|--------------|
| Amino acid residue | Atom | Nucleotide residue | Atom |              |
| C1                 | N4   | LYS62              | O    | 85.271       |
| THR51              | OG1  | U9                 | O1P  | 65.843       |
| TYR132             | OH   | A2                 | O1P  | 61.974       |
| ARG67              | NH2  | A2                 | O2P  | 61.804       |
| GLY57              | N    | G12                | O2P  | 56.314       |

|        |     |      |     |        |
|--------|-----|------|-----|--------|
| ARG137 | NH1 | G5   | O2P | 46.915 |
| ARG137 | NH2 | G5   | O2P | 46.875 |
| LYS62  | NZ  | U13  | O4  | 44.666 |
| ARG48  | NH1 | G8   | O5' | 34.477 |
| THR51  | N   | U9   | O2P | 33.817 |
| ARG137 | NH1 | U4   | O2P | 32.597 |
| ARG55  | NH2 | C10  | O1P | 31.437 |
| ARG48  | NH1 | U9   | O1P | 31.087 |
| THR51  | N   | U9   | O1P | 30.937 |
| ARG55  | NH1 | C10  | O2P | 29.287 |
| ARG52  | NH2 | A11  | O2P | 27.697 |
| ARG52  | NE  | C10  | O2P | 27.427 |
| ASN8   | ND2 | C7   | O2' | 26.007 |
| ARG52  | NH2 | C10  | O1P | 25.537 |
| ARG137 | NH2 | U4   | O2P | 23.198 |
| ARG52  | NH2 | C10  | O2P | 22.958 |
| LYS62  | NZ  | G12  | O6  | 22.758 |
| ARG52  | NE  | C10  | O1P | 22.028 |
| ARG52  | NH1 | C10  | O1P | 21.588 |
| ARG48  | NH2 | U9   | O1P | 20.328 |
| LYS62  | NZ  | G12  | N7  | 17.198 |
| HIS19  | NE2 | A2   | O1P | 16.858 |
| ARG52  | NH2 | C10  | O5' | 16.528 |
| G8     | N2  | ASN8 | O   | 16.348 |
| C7     | O2' | ASN8 | OD1 | 14.249 |
| GLY1   | N   | A6   | N3  | 13.079 |
| GLY139 | N   | A6   | O2P | 13.069 |
| C7     | O3' | ALA2 | O   | 12.889 |

**Table S40.** Protein-RNA hydrogen bonds with percentage of persistence higher than 10% for run 15 of the N-NTD:dsNS complex.

| Donor              |      | Acceptor           |      | %Persistence |
|--------------------|------|--------------------|------|--------------|
| Amino acid Residue | Atom | Nucleotide residue | Atom |              |
| ARG52              | NH1  | U9                 | O2P  | 91.581       |
| ARG52              | NH1  | U9                 | O2P  | 91.581       |
| C7                 | O2'  | ALA116             | O    | 91.461       |
| C7                 | O2'  | ALA116             | O    | 91.461       |
| ARG52              | NH2  | C10                | O2P  | 89.651       |
| ARG52              | NH2  | C10                | O2P  | 89.651       |
| ASN8               | ND2  | U9                 | O1P  | 88.301       |
| ASN8               | ND2  | U9                 | O1P  | 88.301       |
| ARG53              | N    | U9                 | O2P  | 82.602       |
| ARG53              | N    | U9                 | O2P  | 82.602       |
| ARG52              | NH1  | C10                | O2P  | 80.812       |
| ARG52              | NH1  | C10                | O2P  | 80.812       |
| G8                 | O2'  | ASN8               | OD1  | 60.344       |
| G8                 | O2'  | ASN8               | OD1  | 60.344       |
| ALA116             | N    | C7                 | O2   | 54.385       |

|        |     |       |     |        |
|--------|-----|-------|-----|--------|
| ALA116 | N   | C7    | O2  | 54.385 |
| ARG137 | NH2 | A6    | O2P | 50.195 |
| ARG137 | NH2 | A6    | O2P | 50.195 |
| GLY56  | N   | C10   | O1P | 45.425 |
| GLY56  | N   | C10   | O1P | 45.425 |
| ARG55  | NH2 | G12   | O2P | 43.026 |
| ARG55  | NH2 | G12   | O2P | 43.026 |
| ARG55  | NE  | A11   | O2P | 39.736 |
| ARG55  | NE  | A11   | O2P | 39.736 |
| ARG53  | NH1 | U9    | O1P | 37.546 |
| ARG53  | NH1 | U9    | O1P | 37.546 |
| C1     | O5' | GLN18 | O   | 34.197 |
| C1     | O5' | GLN18 | O   | 34.197 |
| ARG53  | NE  | U9    | O1P | 33.367 |
| ARG53  | NE  | U9    | O1P | 33.367 |
| ARG55  | NH2 | A11   | O2P | 30.387 |
| ARG55  | NH2 | A11   | O2P | 30.387 |
| ARG109 | NH2 | G8    | N3  | 29.577 |
| ARG109 | NH2 | G8    | N3  | 29.577 |
| SER65  | OG  | A2    | O1P | 27.427 |
| SER65  | OG  | A2    | O1P | 27.427 |
| ARG137 | NE  | A6    | O2P | 26.677 |
| ARG137 | NE  | A6    | O2P | 26.677 |
| GLY57  | N   | C10   | O1P | 26.017 |
| GLY57  | N   | C10   | O1P | 26.017 |
| ARG137 | NH2 | G5    | O1P | 24.388 |
| ARG137 | NH2 | G5    | O1P | 24.388 |
| GLY4   | N   | U9    | O2' | 22.428 |
| GLY4   | N   | U9    | O2' | 22.428 |
| ARG67  | NH2 | C3    | O2P | 18.848 |
| ARG67  | NH2 | C3    | O2P | 18.848 |
| ARG55  | NH1 | A11   | O2P | 18.828 |
| ARG55  | NH1 | A11   | O2P | 18.828 |
| GLY20  | N   | C1    | O4' | 18.308 |
| GLY20  | N   | C1    | O4' | 18.308 |
| ARG137 | NH1 | A6    | O2P | 18.048 |
| ARG137 | NH1 | A6    | O2P | 18.048 |
| ARG55  | NH1 | G12   | O2P | 17.798 |
| ARG55  | NH1 | G12   | O2P | 17.798 |
| ARG53  | NH2 | U9    | O1P | 17.678 |
| ARG53  | NH2 | U9    | O1P | 17.678 |
| ARG67  | NH2 | A2    | O2P | 16.618 |
| ARG67  | NH2 | A2    | O2P | 16.618 |
| ALA116 | N   | G8    | N2  | 16.078 |
| ALA116 | N   | G8    | N2  | 16.078 |
| ARG55  | NH2 | A11   | O1P | 15.898 |
| ARG55  | NH2 | A11   | O1P | 15.898 |
| SER65  | OG  | A2    | O2P | 15.688 |
| SER65  | OG  | A2    | O2P | 15.688 |
| ARG53  | NH2 | G8    | O3' | 15.648 |
| ARG53  | NH2 | G8    | O3' | 15.648 |

|        |     |       |     |        |
|--------|-----|-------|-----|--------|
| ARG67  | NE  | A2    | O2P | 14.859 |
| ARG67  | NE  | A2    | O2P | 14.859 |
| G8     | O5' | THR51 | O   | 13.269 |
| G8     | O5' | THR51 | O   | 13.269 |
| SER65  | N   | C1    | O4' | 13.249 |
| SER65  | N   | C1    | O4' | 13.249 |
| ARG137 | NH1 | G5    | O2P | 12.739 |
| ARG137 | NH1 | G5    | O2P | 12.739 |
| MET3   | N   | U9    | O2' | 11.389 |
| MET3   | N   | U9    | O2' | 11.389 |
| LYS62  | NZ  | G14   | O6  | 11.079 |
| LYS62  | NZ  | G14   | O6  | 11.079 |
| ARG55  | NH2 | A11   | O5' | 10.919 |
| ARG55  | NH2 | A11   | O5' | 10.919 |
| SER65  | N   | A2    | O2P | 10.809 |
| SER65  | N   | A2    | O2P | 10.809 |
| LYS21  | NZ  | C1    | N3  | 10.759 |
| LYS21  | NZ  | C1    | N3  | 10.759 |
| GLY1   | N   | A11   | O1P | 10.669 |
| GLY1   | N   | A11   | O1P | 10.669 |

**Table S41.** Protein-RNA hydrogen bonds with percentage of persistence higher than 10% for run 16 of the N-NTD:dsNS complex.

| Donor              |      | Acceptor           |      | %Persistence |
|--------------------|------|--------------------|------|--------------|
| Amino acid residue | Atom | Nucleotide residue | Atom |              |
| SER11              | N    | G8                 | O4'  | 81.732       |
| ARG53              | NH2  | C10                | O2P  | 54.775       |
| ARG137             | NH1  | U4                 | O2P  | 53.725       |
| ARG53              | NH2  | U9                 | O1P  | 49.395       |
| SER65              | N    | C1                 | O5'  | 47.995       |
| ARG137             | NH2  | C3                 | O1P  | 40.626       |
| C7                 | N4   | SER140             | OC1  | 36.076       |
| ARG137             | NH1  | C3                 | O5'  | 33.497       |
| ARG137             | NH2  | C3                 | O2P  | 32.997       |
| ARG55              | NH2  | G12                | O2P  | 29.737       |
| ASP58              | N    | G14                | N7   | 28.777       |
| ARG137             | NH2  | U4                 | O2P  | 28.397       |
| C1                 | N4   | LYS62              | O    | 26.667       |
| ARG137             | NH1  | C3                 | O1P  | 26.637       |
| SER11              | OG   | G8                 | O5'  | 26.347       |
| SER140             | OG   | C7                 | N4   | 25.727       |
| A6                 | N6   | SER140             | OC2  | 24.278       |
| ARG52              | NH1  | G12                | O6   | 23.868       |
| ARG55              | NH2  | U13                | O2P  | 22.728       |
| ARG52              | NH2  | G12                | N7   | 22.538       |
| GLY57              | N    | U13                | O4   | 22.468       |
| LYS60              | NZ   | U13                | O2P  | 22.428       |
| ARG53              | NH1  | C10                | O2P  | 21.958       |

|        |     |        |     |        |
|--------|-----|--------|-----|--------|
| ARG52  | NH2 | C10    | O2P | 21.528 |
| ARG137 | NH1 | C3     | O2P | 21.158 |
| ARG109 | NH1 | G8     | N3  | 20.918 |
| ARG55  | NE  | G12    | O2P | 20.818 |
| LYS60  | NZ  | G12    | O1P | 19.168 |
| ARG137 | NE  | U4     | O2P | 17.498 |
| ARG53  | NH1 | U9     | O1P | 15.188 |
| GLY57  | N   | A11    | O1P | 15.018 |
| MET3   | N   | C10    | O1P | 14.939 |
| SER65  | OG  | A2     | O2P | 13.849 |
| C7     | O3' | ASN113 | O   | 13.759 |
| ARG53  | NE  | C10    | O2P | 13.439 |
| ARG55  | NH2 | G12    | O5' | 12.899 |
| LYS62  | NZ  | G12    | N7  | 11.509 |
| LYS62  | NZ  | G12    | O6  | 10.489 |
| ARG52  | NH1 | C10    | O2P | 10.319 |
| G14    | O2' | ASP58  | OD2 | 10.129 |

**Table S42.** Protein-RNA hydrogen bonds with percentage of persistence higher than 10% for run 17 of the N-NTD:dsNS complex.

| Donor              |      | Acceptor           |      | %Persistence |
|--------------------|------|--------------------|------|--------------|
| Amino acid residue | Atom | Nucleotide residue | Atom |              |
| G8                 | N2   | PRO111             | O    | 97.34        |
| SER65              | OG   | A2                 | O2P  | 82.622       |
| ARG137             | NH1  | U4                 | O2P  | 79.712       |
| ARG109             | NH1  | G8                 | N3   | 78.762       |
| ARG52              | NH2  | C10                | O2P  | 77.772       |
| SER11              | N    | G8                 | O4'  | 65.673       |
| ASN8               | ND2  | U9                 | O1P  | 65.143       |
| SER65              | OG   | C1                 | O5'  | 63.294       |
| C1                 | N4   | LYS62              | O    | 60.894       |
| GLY57              | N    | G12                | O2P  | 60.054       |
| ARG52              | NH1  | C10                | O2P  | 55.254       |
| ARG109             | NH2  | G8                 | N2   | 54.205       |
| LYS62              | NZ   | G12                | O6   | 51.615       |
| ARG137             | NH2  | C3                 | O1P  | 46.275       |
| ARG52              | NH2  | U9                 | O1P  | 46.015       |
| ARG137             | NH1  | C3                 | O5'  | 45.555       |
| C7                 | O2'  | ALA112             | O    | 44.966       |
| ARG137             | NH2  | C3                 | O2P  | 40.306       |
| G8                 | O2'  | ASN8               | OD1  | 36.596       |
| HIS19              | NE2  | C3                 | O2P  | 30.307       |
| ARG137             | NH1  | C3                 | O2P  | 29.527       |
| ARG137             | NH1  | C3                 | O1P  | 28.217       |
| ARG52              | NH2  | U9                 | O2P  | 26.247       |
| C1                 | N4   | ASP63              | O    | 25.577       |
| ARG109             | NH2  | G8                 | N3   | 25.277       |
| ARG55              | NH1  | A11                | O2P  | 22.828       |

|        |     |     |     |        |
|--------|-----|-----|-----|--------|
| ARG55  | NH2 | C10 | O1P | 22.258 |
| TYR71  | OH  | G8  | O5' | 21.258 |
| LYS62  | NZ  | G12 | N7  | 19.948 |
| ARG52  | NE  | U9  | O1P | 18.228 |
| ARG55  | NH1 | C10 | O1P | 15.788 |
| SER11  | N   | G8  | O5' | 14.829 |
| TYR69  | OH  | U9  | O2P | 14.709 |
| ARG55  | NH1 | C10 | O5' | 14.509 |
| SER140 | N   | G5  | O1P | 13.659 |
| ARG52  | NH1 | U9  | O2P | 12.209 |
| HIS19  | NE2 | A2  | O3' | 11.559 |
| SER140 | OG  | G5  | O1P | 10.809 |
| LYS62  | NZ  | U13 | O4  | 10.629 |

**Table S43.** Protein-RNA hydrogen bonds with percentage of persistence higher than 10% for run 18 of the N-NTD:dsNS complex.

| Donor              |      | Acceptor           |      | %Persistence |
|--------------------|------|--------------------|------|--------------|
| Amino acid residue | Atom | Nucleotide residue | Atom |              |
| ARG52              | NE   | C10                | O2P  | 78.612       |
| ARG52              | NH2  | A11                | O2P  | 76.252       |
| SER65              | OG   | A2                 | O2P  | 76.152       |
| TYR132             | OH   | C3                 | O2P  | 73.163       |
| SER11              | N    | G8                 | O4'  | 66.063       |
| ARG109             | NH2  | G8                 | N3   | 55.014       |
| G8                 | N2   | PRO111             | O    | 53.575       |
| ARG52              | NH2  | C10                | O2P  | 44.926       |
| G8                 | N2   | ALA112             | O    | 41.006       |
| C1                 | N4   | LYS62              | O    | 38.826       |
| ARG137             | NE   | A6                 | O2P  | 38.556       |
| ARG67              | NH1  | A2                 | O2P  | 35.286       |
| ARG137             | NH1  | G5                 | O2P  | 31.697       |
| C1                 | N4   | ASP63              | O    | 31.647       |
| ASN113             | ND2  | U9                 | O2   | 30.457       |
| A6                 | N6   | GLU134             | OE1  | 28.527       |
| C7                 | O2'  | ALA112             | O    | 24.938       |
| ARG67              | NH2  | A2                 | O2P  | 23.898       |
| ARG137             | NH2  | A6                 | O2P  | 21.548       |
| LYS62              | NZ   | G12                | O6   | 21.368       |
| GLY57              | N    | A11                | O1P  | 20.888       |
| HIS19              | NE2  | C3                 | O2P  | 19.948       |
| LYS62              | NZ   | G12                | N7   | 18.438       |
| ARG52              | NH1  | A11                | O2P  | 17.968       |
| LYS60              | NZ   | G12                | O2P  | 17.888       |
| ARG109             | NH1  | G8                 | N2   | 16.308       |
| LYS62              | NZ   | U13                | O4   | 16.128       |
| SER65              | OG   | C1                 | O5'  | 15.988       |
| ARG52              | NH2  | C10                | O5'  | 15.678       |
| SER140             | OG   | C3                 | O1P  | 15.318       |

|        |     |        |     |        |
|--------|-----|--------|-----|--------|
| C7     | O2' | ASN113 | O   | 14.229 |
| C7     | O3' | ASN113 | O   | 13.809 |
| A6     | N6  | GLU134 | OE2 | 13.059 |
| ARG53  | N   | U9     | O1P | 11.899 |
| TYR71  | OH  | G8     | O5' | 11.769 |
| ARG137 | NH2 | G5     | O2P | 11.299 |
| ARG137 | NH1 | G5     | O1P | 10.919 |
| ARG53  | NE  | U9     | O1P | 10.879 |
| SER11  | OG  | G8     | O5' | 10.859 |
| GLY138 | N   | G5     | O1P | 10.359 |

**Table S44.** Protein-RNA hydrogen bonds with percentage of persistence higher than 10% for run 19 of the N-NTD:dsNS complex.

| Donor              |      | Acceptor           |      | %Persistence |
|--------------------|------|--------------------|------|--------------|
| Amino acid residue | Atom | Nucleotide residue | Atom |              |
| TYR132             | OH   | A2                 | O1P  | 76.752       |
| C1                 | O5'  | GLU134             | OE2  | 72.473       |
| ARG52              | NH1  | C10                | O2P  | 53.155       |
| ARG52              | NH2  | A11                | O2P  | 51.675       |
| TYR69              | OH   | U9                 | O2P  | 50.255       |
| ARG137             | NH1  | G5                 | O6   | 48.125       |
| GLY4               | N    | C7                 | O2'  | 44.836       |
| ARG137             | NH2  | G5                 | N7   | 39.486       |
| ARG52              | NH1  | A11                | O2P  | 38.716       |
| GLY135             | N    | A2                 | O1P  | 35.696       |
| THR51              | N    | U9                 | O1P  | 32.567       |
| SER11              | N    | G8                 | O5'  | 30.147       |
| LYS62              | NZ   | G14                | O6   | 28.587       |
| THR51              | OG1  | U9                 | O1P  | 27.747       |
| ARG137             | NH2  | G5                 | O6   | 26.887       |
| G8                 | N2   | GLY1               | O    | 25.927       |
| ARG52              | NH2  | C10                | O2P  | 20.238       |
| TYR69              | OH   | U9                 | O1P  | 19.758       |
| G8                 | N2   | MET3               | O    | 19.108       |
| ARG52              | N    | U9                 | O1P  | 17.948       |
| LYS60              | NZ   | G12                | O2P  | 17.948       |
| ARG52              | NH2  | C10                | O1P  | 17.498       |
| TYR71              | OH   | G8                 | O5'  | 17.138       |
| ARG52              | NE   | C10                | O2P  | 16.828       |
| ARG52              | NH1  | U9                 | O1P  | 15.878       |
| ARG55              | NH1  | G12                | O2P  | 15.438       |
| ARG109             | NH2  | G8                 | N7   | 14.989       |
| G8                 | N2   | ALA2               | O    | 14.899       |
| ARG67              | NH1  | U9                 | O2P  | 14.739       |
| ARG137             | NE   | G5                 | O2P  | 13.109       |
| C1                 | N4   | LYS62              | O    | 12.789       |
| ASN8               | ND2  | G8                 | N3   | 12.689       |
| TYR132             | OH   | A2                 | O2P  | 12.689       |

|        |     |     |     |        |
|--------|-----|-----|-----|--------|
| GLY4   | N   | C7  | O2  | 12.619 |
| MET3   | N   | U9  | O2' | 12.009 |
| SER11  | N   | G8  | O4' | 11.649 |
| ARG137 | NH2 | U9  | O4  | 11.589 |
| ARG52  | NH2 | C10 | O5' | 10.949 |
| ARG52  | NH1 | C10 | O1P | 10.919 |
| LYS60  | NZ  | G12 | O1P | 10.479 |
| ARG137 | NH1 | U4  | O4  | 10.409 |
| ARG55  | NH2 | G12 | O2P | 10.379 |
| ALA2   | N   | U9  | O2' | 10.339 |
| ARG55  | NH2 | U13 | O2P | 10.089 |

**Table S45.** Protein-RNA hydrogen bonds with percentage of persistence higher than 10% for run 20 of the N-NTD:dsNS complex.

| Donor              |      | Acceptor           |      | %Persistence |
|--------------------|------|--------------------|------|--------------|
| Amino acid residue | Atom | Nucleotide residue | Atom |              |
| ARG52              | NH2  | C10                | O1P  | 88.831       |
| SER65              | OG   | A2                 | O2P  | 81.802       |
| ARG52              | NE   | C10                | O2P  | 78.032       |
| ARG55              | NH1  | A11                | O2P  | 66.743       |
| G8                 | N2   | ALA112             | O    | 63.204       |
| ARG55              | NH1  | C10                | O1P  | 57.404       |
| ASN113             | ND2  | C10                | O4'  | 55.464       |
| C1                 | N4   | ASP63              | O    | 55.424       |
| ASN113             | ND2  | U9                 | O2   | 54.895       |
| ASN8               | ND2  | U9                 | O1P  | 54.775       |
| ARG55              | NH2  | A11                | O1P  | 54.015       |
| ALA115             | N    | C7                 | O2'  | 50.875       |
| ARG67              | NE   | A2                 | O2P  | 49.375       |
| SER11              | N    | G8                 | O4'  | 47.975       |
| ARG67              | NH2  | C3                 | O2P  | 46.015       |
| ARG67              | NH2  | A2                 | O5'  | 36.316       |
| ARG67              | NH2  | A2                 | O2P  | 35.066       |
| LYS60              | NZ   | G12                | O2P  | 33.277       |
| LYS62              | NZ   | G12                | O6   | 32.757       |
| C1                 | N4   | LYS62              | O    | 31.927       |
| ARG55              | NH2  | A11                | O2P  | 31.167       |
| LYS62              | NZ   | G12                | N7   | 31.117       |
| C7                 | O3'  | ASN113             | O    | 29.147       |
| ARG52              | NH1  | U9                 | O1P  | 26.737       |
| SER65              | OG   | C1                 | O5'  | 25.917       |
| SER11              | N    | G8                 | O5'  | 24.298       |
| G8                 | O2'  | ASN8               | OD1  | 21.378       |
| ARG55              | NH2  | C10                | O1P  | 17.498       |
| ARG109             | NH2  | G8                 | N3   | 16.208       |
| THR17              | OG1  | A2                 | O1P  | 15.918       |
| LYS60              | NZ   | G12                | O1P  | 15.218       |
| ARG55              | NH1  | A11                | O1P  | 12.719       |



|        |     |        |     |        |
|--------|-----|--------|-----|--------|
| LYS60  | NZ  | U13    | O2P | 11.939 |
| ASN114 | N   | G8     | N2  | 11.179 |
| U9     | O2' | ASN113 | OD1 | 10.729 |
| TYR71  | OH  | G8     | O5' | 10.349 |

**Table S46.** Protein-RNA hydrogen bonds with percentage of persistence higher than 10% for run 21 of the N-NTD:dsNS complex.

| Donor              |      | Acceptor           |      | %Persistence |
|--------------------|------|--------------------|------|--------------|
| Amino acid residue | Atom | Nucleotide residue | Atom |              |
| GLY4               | N    | U9                 | O2'  | 64.064       |
| C1                 | O5'  | GLU134             | OE1  | 55.134       |
| ARG52              | NH2  | G12                | N7   | 54.915       |
| ARG52              | NH1  | G12                | O6   | 54.275       |
| ARG109             | NH2  | G8                 | O2'  | 39.316       |
| ARG109             | NH1  | G8                 | O2'  | 38.976       |
| ARG53              | NH2  | A11                | O2P  | 34.387       |
| ARG53              | NH2  | C10                | O1P  | 33.097       |
| ARG109             | NH2  | G8                 | O3'  | 32.647       |
| C1                 | O5'  | GLU134             | OE2  | 32.137       |
| ARG137             | NH1  | A2                 | O1P  | 31.657       |
| C10                | O2'  | GLY1               | O    | 29.727       |
| ARG137             | NH1  | C3                 | O2P  | 29.297       |
| LYS62              | NZ   | G14                | N7   | 28.667       |
| ASN8               | ND2  | C10                | O1P  | 28.547       |
| ARG109             | NH2  | U9                 | O1P  | 28.547       |
| ARG67              | NH2  | C1                 | O5'  | 25.867       |
| ARG55              | NH2  | G12                | O1P  | 21.828       |
| ALA116             | N    | G8                 | O5'  | 21.818       |
| ARG55              | NH1  | U13                | O2P  | 20.368       |
| ARG109             | NH1  | G8                 | O3'  | 19.888       |
| ARG137             | NH2  | C3                 | O2P  | 19.288       |
| ARG67              | NH2  | C1                 | O4'  | 19.028       |
| G8                 | O2'  | PRO111             | O    | 18.628       |
| ARG55              | NH1  | G12                | O5'  | 15.438       |
| GLY1               | N    | A11                | O1P  | 14.509       |
| ARG53              | NH1  | C10                | O1P  | 13.299       |
| ARG137             | NH2  | C3                 | O1P  | 12.809       |
| ALA116             | N    | G8                 | O4'  | 12.619       |
| ASN8               | ND2  | U9                 | O3'  | 12.349       |
| ARG53              | NE   | A11                | O1P  | 11.749       |
| ARG52              | NH2  | G12                | O6   | 11.469       |
| ARG55              | NH1  | G12                | O1P  | 11.319       |

**Table S47.** Protein-RNA hydrogen bonds with percentage of persistence higher than 10% for run 22 of the N-NTD:dsNS complex.

| Donor              |      | Acceptor           |      | %Persistence |
|--------------------|------|--------------------|------|--------------|
| Amino acid residue | Atom | Nucleotide residue | Atom |              |
| SER11              | N    | G8                 | O4'  | 95.21        |
| ARG137             | NH1  | C3                 | O2P  | 89.761       |
| G8                 | N2   | PRO111             | O    | 72.873       |
| ARG52              | NH1  | C10                | O2P  | 69.073       |
| C1                 | N4   | LYS62              | O    | 68.413       |
| ARG52              | NH2  | C10                | O2P  | 65.023       |
| ASN8               | ND2  | U9                 | O1P  | 62.944       |
| ALA116             | N    | G8                 | O6   | 55.934       |
| ARG137             | NH2  | A2                 | O1P  | 48.615       |
| ARG137             | NH1  | A2                 | O1P  | 44.976       |
| ARG52              | NH2  | U9                 | O1P  | 41.226       |
| LYS60              | NZ   | A11                | O1P  | 33.247       |
| ARG67              | NH2  | A2                 | O2P  | 31.587       |
| ARG137             | NH1  | A2                 | O5'  | 30.007       |
| G8                 | O2'  | PRO111             | O    | 29.657       |
| ARG137             | NH2  | A2                 | O2P  | 28.747       |
| LYS62              | NZ   | G12                | O6   | 27.487       |
| LYS60              | NZ   | A11                | O2P  | 24.818       |
| LYS62              | NZ   | U13                | O4   | 23.478       |
| GLY139             | N    | G5                 | O2P  | 23.418       |
| C1                 | O5'  | ASP63              | O    | 22.408       |
| SER65              | N    | C1                 | O5'  | 19.758       |
| LYS62              | NZ   | G12                | N7   | 17.238       |
| ALA115             | N    | C7                 | O2'  | 15.408       |
| C7                 | O3'  | ASN113             | O    | 15.118       |
| ASN114             | N    | G8                 | N2   | 14.609       |
| C7                 | O2'  | ASN113             | O    | 14.409       |
| ASN8               | ND2  | G8                 | O3'  | 13.799       |
| GLY1               | N    | C10                | O1P  | 11.769       |
| GLY139             | N    | U4                 | O1P  | 11.409       |
| ASN8               | ND2  | G8                 | O5'  | 11.079       |
| ARG137             | NH1  | A2                 | O2P  | 10.899       |
| GLY138             | N    | U4                 | O2P  | 10.219       |

**Table S48.** Protein-RNA hydrogen bonds with percentage of persistence higher than 10% for run 23 of the N-NTD:dsNS complex.

| Donor              |      | Acceptor           |      | %Persistence |
|--------------------|------|--------------------|------|--------------|
| Amino acid residue | Atom | Nucleotide residue | Atom |              |
| G8                 | N2   | ASN8               | OD1  | 75.812       |
| C10                | N4   | TYR69              | OH   | 75.362       |
| TYR69              | OH   | U9                 | O2P  | 71.933       |
| ARG52              | NH2  | A11                | O1P  | 71.273       |

|        |     |        |     |        |
|--------|-----|--------|-----|--------|
| GLY4   | N   | U9     | O2  | 67.373 |
| ARG137 | NH2 | G5     | O2P | 59.624 |
| TYR71  | OH  | G8     | O5' | 53.325 |
| GLY138 | N   | C3     | O2P | 51.675 |
| SER11  | N   | G8     | N7  | 47.645 |
| ARG48  | NH1 | G8     | O5' | 47.445 |
| ARG137 | NE  | U4     | O2P | 45.095 |
| LYS60  | NZ  | G12    | O2P | 42.006 |
| U9     | O2' | ALA2   | O   | 39.826 |
| ARG137 | NE  | G5     | O2P | 38.326 |
| C7     | O2' | GLY4   | O   | 35.136 |
| C1     | O5' | GLY130 | O   | 26.087 |
| ARG55  | NH2 | C10    | O1P | 23.328 |
| ARG52  | NH1 | C10    | O1P | 22.938 |
| ARG137 | NH2 | U4     | O2P | 22.538 |
| ARG52  | NE  | A11    | O1P | 20.118 |
| GLY139 | N   | A2     | O1P | 19.608 |
| ARG109 | NH2 | G8     | O6  | 19.448 |
| GLY138 | N   | U4     | O2P | 19.388 |
| ARG52  | NE  | A11    | O2P | 19.048 |
| ARG53  | N   | C10    | O2P | 18.818 |
| LYS60  | NZ  | A11    | O1P | 17.508 |
| ARG52  | NH1 | A11    | O2P | 17.038 |
| ARG109 | NH2 | C7     | N4  | 16.718 |
| ARG53  | NE  | C10    | O1P | 15.108 |
| GLY138 | N   | U4     | O1P | 13.869 |
| ARG55  | NH1 | C10    | O1P | 13.409 |
| LYS60  | NZ  | G12    | O1P | 12.189 |
| C1     | O5' | PHE131 | O   | 11.189 |
| SER140 | OG  | A2     | O1P | 10.789 |
| SER140 | N   | A2     | O1P | 10.669 |
| ARG53  | NE  | U9     | O1P | 10.569 |
| ARG53  | NH2 | U9     | O1P | 10.129 |

**Table S49.** Protein-RNA hydrogen bonds with percentage of persistence higher than 10% for run 24 of the N-NTD:dsNS complex.

| Donor              |      | Acceptor           |      | %Persistence |
|--------------------|------|--------------------|------|--------------|
| Amino acid residue | Atom | Nucleotide residue | Atom |              |
| C1                 | N4   | LYS62              | O    | 92.081       |
| ARG67              | NH2  | A2                 | O2P  | 85.931       |
| ARG48              | NH1  | U9                 | O2P  | 80.262       |
| TYR71              | OH   | G8                 | O5'  | 70.093       |
| ARG67              | NH1  | A2                 | O2P  | 63.084       |
| SER65              | N    | C1                 | O5'  | 62.294       |
| ARG52              | NH2  | A11                | O2P  | 58.334       |
| LYS62              | NZ   | G12                | N7   | 44.626       |
| ARG52              | NH1  | A11                | O2P  | 42.696       |
| LYS62              | NZ   | G12                | O6   | 40.986       |

|        |     |      |     |        |
|--------|-----|------|-----|--------|
| LYS60  | NZ  | G12  | O1P | 40.606 |
| ARG52  | NH1 | C10  | O2P | 27.947 |
| C7     | O3' | LEU5 | O   | 26.477 |
| LYS60  | NZ  | U13  | O2P | 25.807 |
| LEU5   | N   | C7   | O1P | 24.118 |
| ARG52  | NH1 | C10  | O1P | 23.208 |
| LYS62  | NZ  | U13  | O4  | 22.538 |
| ARG48  | NH2 | U9   | O1P | 21.428 |
| ARG137 | NH1 | C3   | O1P | 21.408 |
| SER11  | N   | G8   | N7  | 20.958 |
| TYR69  | OH  | U9   | O4  | 19.518 |
| ARG137 | NH1 | U4   | O2P | 19.388 |
| ARG137 | NH2 | C3   | O1P | 18.128 |
| ARG52  | NH2 | A11  | N7  | 17.498 |
| ARG137 | NH2 | U4   | O2P | 15.308 |
| ASN8   | ND2 | G8   | O2' | 15.058 |
| LYS60  | NZ  | G12  | O2P | 14.219 |
| ARG52  | NH2 | A11  | O1P | 12.489 |
| ARG137 | NE  | C3   | O1P | 11.559 |
| ARG137 | NH2 | C3   | O2P | 10.329 |
| LEU5   | N   | C7   | O3' | 10.239 |

**Table S50.** Protein-RNA hydrogen bonds with percentage of persistence higher than 10% for run 25 of the N-NTD:dsNS complex.

| Donor              |      | Acceptor           |      | %Persistence |
|--------------------|------|--------------------|------|--------------|
| Amino acid residue | Atom | Nucleotide residue | Atom |              |
| ARG137             | NH2  | C3                 | O1P  | 62.784       |
| G8                 | N2   | PRO111             | O    | 56.434       |
| ARG137             | NH2  | U4                 | O2P  | 55.394       |
| ARG109             | NH2  | G8                 | N3   | 47.505       |
| ASN8               | ND2  | U9                 | O1P  | 46.525       |
| ARG137             | NH1  | C3                 | O1P  | 46.165       |
| SER65              | OG   | A2                 | O2P  | 45.435       |
| ARG52              | NH1  | U9                 | O2P  | 45.155       |
| ARG67              | NH2  | A2                 | O2P  | 34.107       |
| C1                 | N4   | MET61              | O    | 33.597       |
| ARG52              | NH1  | C10                | O2P  | 33.027       |
| ARG137             | NH1  | U4                 | O2P  | 30.437       |
| C7                 | O2'  | ALA112             | O    | 30.327       |
| LYS62              | NZ   | G12                | O6   | 25.967       |
| ARG52              | NH2  | C10                | O2P  | 25.237       |
| ARG109             | NH1  | G8                 | N2   | 24.838       |
| C1                 | N4   | LYS62              | O    | 24.578       |
| ARG52              | NH1  | U9                 | O1P  | 24.388       |
| TYR69              | OH   | G8                 | O6   | 24.098       |
| ARG137             | NE   | U4                 | O1P  | 23.738       |
| ARG52              | NH2  | C10                | O1P  | 23.168       |
| SER65              | OG   | A2                 | O1P  | 22.858       |

|        |     |        |     |        |
|--------|-----|--------|-----|--------|
| SER65  | N   | A2     | O2P | 21.338 |
| LYS60  | NZ  | G12    | O2P | 20.268 |
| C7     | O2' | PRO111 | O   | 19.308 |
| C1     | N4  | ASP63  | O   | 19.068 |
| U9     | O2' | GLY1   | O   | 18.958 |
| ARG67  | NH1 | A2     | O2P | 18.708 |
| ARG52  | NE  | C10    | O2P | 18.658 |
| LYS62  | NZ  | G12    | N7  | 18.168 |
| ARG137 | NE  | U4     | O2P | 18.018 |
| C1     | O5' | ASP63  | O   | 17.768 |
| SER11  | N   | G8     | O4' | 16.948 |
| GLY1   | N   | C10    | O1P | 16.118 |
| G8     | O2' | ASN8   | OD1 | 15.058 |
| GLY57  | N   | A11    | O2P | 14.589 |
| ARG67  | NH2 | A2     | O1P | 14.099 |
| SER140 | N   | G5     | O1P | 13.819 |
| LYS60  | NZ  | U13    | O2P | 13.209 |
| SER65  | OG  | C1     | O5' | 12.529 |
| LYS60  | NZ  | G14    | N7  | 12.159 |
| ARG137 | NH1 | C3     | O5' | 11.939 |
| TYR69  | OH  | G8     | N7  | 10.979 |
| ARG67  | NE  | A2     | O2P | 10.179 |

## REFERENCES

1. Bunker, D.L., B. Garrett, T. Kleindienst, and G.S. Long. 1974. Discrete simulation methods in combustion kinetics. *Combust. Flame.* 23:373–379.
2. Gillespie, D.T. 1976. A general method for numerically simulating the stochastic time evolution of coupled chemical reactions. *J. Comput. Phys.* 22:403–434.
3. Grossoehme, N.E., L. Li, S.C. Keane, P. Liu, C.E. Dann, J.L. Leibowitz, and D.P. Giedroc. 2009. Coronavirus N Protein N-Terminal Domain (NTD) Specifically Binds the Transcriptional Regulatory Sequence (TRS) and Melts TRS-cTRS RNA Duplexes. *J. Mol. Biol.* 394:544–557.
4. Keane, S.C., P. Lius, J.L. Leibowitzs, and D.P. Giedroc. 2012. Functional Transcriptional Regulatory Sequence (TRS) RNA binding and helix destabilizing determinants of Murine Hepatitis Virus (MHV) Nucleocapsid (N) protein. *J. Biol.*

- Chem.* 287:7063–7073.
5. Larkin, M.A., G. Blackshields, N.P. Brown, R. Chenna, P.A. Mcgettigan, H. McWilliam, F. Valentin, I.M. Wallace, A. Wilm, R. Lopez, J.D. Thompson, T.J. Gibson, and D.G. Higgins. 2007. Clustal W and Clustal X version 2.0. *Bioinformatics.* 23:2947–2948.
  6. Baker, N.A., D. Sept, S. Joseph, M.J. Holst, and J.A. McCammon. 2001. Electrostatics of nanosystems: Application to microtubules and the ribosome. *Proc. Natl. Acad. Sci. U. S. A.* 98:10037–10041.
  7. Dolinsky, T.J., P. Czodrowski, H. Li, J.E. Nielsen, J.H. Jensen, G. Klebe, and N.A. Baker. 2007. PDB2PQR: expanding and upgrading automated preparation of biomolecular structures for molecular simulations. *Nucleic Acids Res.* 35:W522-5.
  8. Olsson, M.H.M., C.R. SØndergaard, M. Rostkowski, and J.H. Jensen. 2011. PROPKA3: Consistent treatment of internal and surface residues in empirical p K a predictions. *J. Chem. Theory Comput.* 7:525–537.
  9. Delano, W.L. 2002. The PyMOL Molecular Graphics System. DeLano Scientific, San Carlos, CA, USA. .
